# Supplementary material for: Catalytic asymmetric synthesis of highly substituted pyrrolizidines
Source: Royal Society of Chemistry journal article supplement (doi:10.1039/c2sc21617e), 2012-11-14
Supplement: c2sc21617e.pdf [file c2sc21617e.pdf]

**Catalytic Asymmetric Synthesis of Highly Substituted Pyrrolizidines**

Andrew D. Lim, Julian A. Codelli, Sarah E. Reisman\*

*The Warren and Katharine Schlinger Laboratory of Chemistry and Chemical Engineering*

*Division of Chemistry and Chemical Engineering, California Institute of Technology, Pasadena, California 91125*

*reisman@caltech.edu*

**Supporting Information 1 (Experimental Procedures):**

## Table of Contents

|                                                                   |         |
|-------------------------------------------------------------------|---------|
| 1. Materials and methods                                          | S3      |
| 2. General procedure for the synthesis of $\alpha$ -iminoesters   | S4      |
| 3. General procedure for the double (3+2) cycloaddition reactions | S4      |
| 4. Optimization of reaction parameters                            | S4-S6   |
| 5. Scale-up procedure                                             | S6-S6   |
| 6. Characterization data                                          | S6-S28  |
| 7. Endo stereochemical assignment for Table 3 compounds           | S28-S29 |
| 8. SFC/HPLC traces of racemic and enantioenriched products        | S29-S60 |

**1. Materials and Methods.** Unless otherwise stated, reactions were performed under a nitrogen atmosphere using freshly dried solvents. Tetrahydrofuran (THF), methylene chloride ( $\text{CH}_2\text{Cl}_2$ ), acetonitrile (MeCN), dimethylformamide (DMF), and toluene (PhMe) were dried by passing through activated alumina columns. Triethylamine ( $\text{Et}_3\text{N}$ ) was distilled over calcium hydride prior to use. Unless otherwise stated, chemicals and reagents were used as received. All reactions were monitored by thin-layer chromatography using EMD/Merck silica gel 60 F254 pre-coated plates (0.25 mm) and were visualized by UV, *p*-anisaldehyde, or  $\text{KMnO}_4$  staining. Flash column chromatography was performed either as described by Still et al.<sup>1</sup> using silica gel (partical size 0.032-0.063) purchased from Silicycle or using pre-packaged RediSep<sup>®</sup>Rf columns on a CombiFlash Rf system (Teledyne ISCO Inc.). Optical rotations were measured on a Jasco P-2000 polarimeter using a 100 mm path-length cell at 589 nm.  $^1\text{H}$  and  $^{13}\text{C}$  NMR spectra were recorded on a Varian Inova 500 (at 500 MHz and 126 MHz, respectively), or a Varian Inova 600 (at 600 MHz and 150 MHz, respectively), and are reported relative to internal  $\text{CHCl}_3$  ( $^1\text{H}$ ,  $\delta = 7.26$ ),  $\text{MeCN-}d_2$  ( $^1\text{H}$ ,  $\delta = 1.94$ ), or acetone- $d_5$  ( $^1\text{H}$ ,  $\delta = 2.05$ ), and  $\text{CDCl}_3$  ( $^{13}\text{C}$ ,  $\delta = 77.0$ ),  $\text{CD}_3\text{CN}$  ( $^{13}\text{C}$ ,  $\delta = 118.26$ ),  $\text{DMSO-}d_6$  ( $^{13}\text{C}$ ,  $\delta = 39.52$ ). Data for  $^1\text{H}$  NMR spectra are reported as follows: chemical shift ( $\delta$  ppm) (multiplicity, coupling constant (Hz), integration). Multiplicity and qualifier abbreviations are as follows: s = singlet, d = doublet, t = triplet, q = quartet, m = multiplet, br = broad, app = apparent. IR spectra were recorded on a Perkin Elmer Paragon 1000 spectrometer and are reported in frequency of absorption ( $\text{cm}^{-1}$ ). HRMS were acquired using an Agilent 6200 Series TOF with an Agilent G1978A Multimode source in electrospray ionization (ESI), atmospheric pressure chemical ionization (APCI), or mixed (MM) ionization mode. Analytical SFC was performed with a Mettler SFC supercritical  $\text{CO}_2$  analytical chromatography system with Chiralcel AD-H, OD-H, AS-H, OB-H, and OJ-H columns (4.6 mm x 25 cm) with visualization at 254 nm. Analytical chiral HPLC was performed with an Agilent 1100 Series HPLC utilizing a Chiralpak AD column (4.6 mm x 25 cm) obtained from Daicel Chemical Industries, Ltd. with visualization at 254 nm. Melting points were determined using a Büchi B-545 capillary melting point apparatus and the values reported are uncorrected.

**2. General procedure for the synthesis of  $\alpha$ -iminoesters.** The  $\alpha$ -iminoesters were prepared according to the procedure reported by Longmire et al. (Longmire, J. M.; Wang, B.; Zhang, X. *J. Am. Chem. Soc.* **2002**, *124*, 13400–13401). To a suspension of the glycine methyl ester hydrochloride (1.1 equiv) and magnesium sulfate (2.0 equiv) in methylene chloride was added triethylamine (1.1 equiv). This solution was stirred at room temperature for 1 h before the aldehyde (1.0 equiv) was added. After stirred at room temperature overnight, magnesium sulfate was filtered off and washed with methylene chloride. The filtrate was washed with distilled water 5 times and then brine, dried over magnesium sulfate, filtered and concentrated to afford the  $\alpha$ -iminoesters. The crude iminoesters could be used directly for the cycloaddition reactions. The reactions reported above were performed on the scale of 1.0–4.0 g of aldehydes at 0.5 M concentration. **NOTE:** Formation of  $\alpha$ -iminoester **8** was allowed to proceed for 1.5 h rather than overnight in order to avoid decomposition.

**3. General procedure for the double (3+2) cycloaddition reactions.** Silver(I) acetate (1.0 equiv) and (*S*)-QUINAP (1.0 equiv) were added to a vial. Tetrahydrofuran was then introduced, and this solution was stirred at room temperature for 1 h to make a stock solution of 0.009 M silver(I)/(*S*)-QUINAP catalyst. Silver(I) acetate/(*S*)-QUINAP catalyst solution (0.03 equiv) followed by the dipolarophile (*t*-Bu Acrylate; 1.5 equiv) and Hünig's base (0.1 equiv) were added to the  $\alpha$ -iminoester (1.0 equiv) at -45 °C in the glovebox. The final concentration of the  $\alpha$ -iminoester was 0.3 M. After stirring for 24 hours, the reaction was allowed to warm to room temperature and taken out of the glovebox. Dipolarophile (5 equiv) and then cinnamaldehyde (1 equiv) were added. After stirring for 24 hours, the reaction was quenched with a tetrahydrofuran solution of acetic acid (1.1 equiv) and concentrated directly. The reactions were performed on a scale of 20–80 mg of the iminoester.

#### **4. Optimization of reaction parameters.**

**Table S1.** Optimization of the catalytic asymmetric (1,3)-dipolar cycloaddition reaction between glycinate imine **9** and *t*-butylacrylate (**8**).



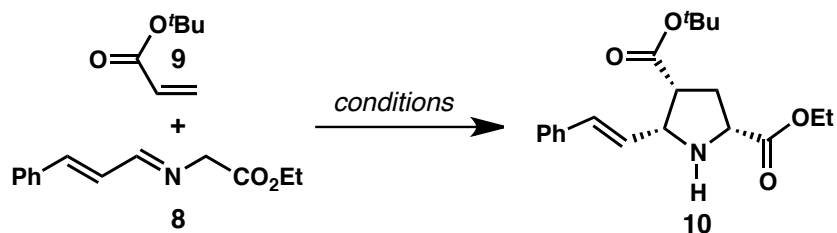

| entry          | catalyst/ligand/additive               | solvent           | temp<br>(°C) | yield <sup>e</sup><br>(%) | ee <sup>f</sup><br>(%) |
|----------------|----------------------------------------|-------------------|--------------|---------------------------|------------------------|
| 1 <sup>a</sup> | CuI, <b>13</b> , DBU                   | CHCl <sub>3</sub> | 0 °C         | 50                        | 96                     |
| 2 <sup>b</sup> | AgOAc, <b>14</b>                       | Et <sub>2</sub> O | 0 °C         | 53                        | –63                    |
| 3 <sup>c</sup> | AgClO <sub>4</sub> , <b>15</b> , DABCO | PhMe              | 0 °C         | 59                        | 46                     |
| 4 <sup>d</sup> | AgOAc, <b>16</b> , DIPEA               | THF               | –45 °C       | 62                        | <b>90</b>              |
| 5 <sup>d</sup> | AgOAc, <b>16</b> , DIPEA               | DCM               | –45 °C       | 36                        | 78                     |
| 6 <sup>d</sup> | AgOAc, <b>16</b> , DIPEA               | CHCl <sub>3</sub> | –45 °C       | 5                         | --                     |
| 7 <sup>d</sup> | AgOAc, <b>16</b> , DIPEA               | PhMe              | –45 °C       | 60                        | 90                     |
| 8 <sup>d</sup> | AgOAc, <b>16</b> , DIPEA               | Et <sub>2</sub> O | –45 °C       | 53                        | 90                     |
| 9 <sup>d</sup> | AgOAc, <b>16</b>                       | THF               | –45 °C       | 56                        | 91                     |

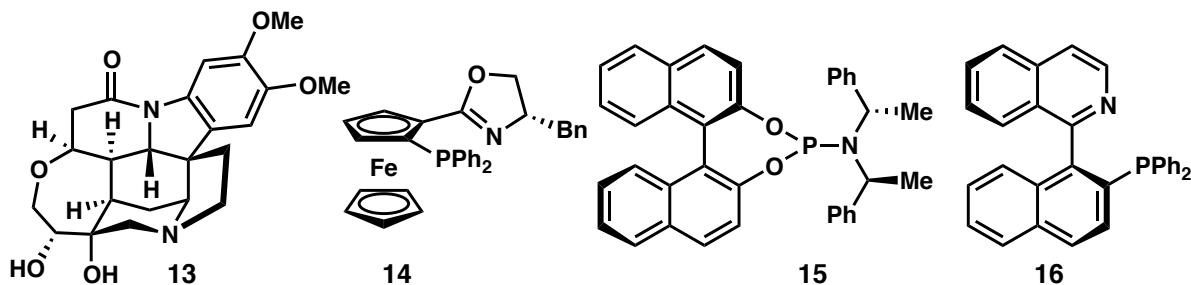

<sup>a</sup>10 mol % each CuI, **13**, and DBU, 1.5 equiv *t*-butyl acrylate. <sup>b</sup>3 mol % AgOAc, 3.3 mol % **14**, 2.0 equiv *t*-butyl acrylate. <sup>c</sup>5 mol % each AgClO<sub>4</sub>, **15**, and DABCO, 1.5 equiv *t*-butyl acrylate. <sup>d</sup>3 mol % each AgOAc and **16**, 10 mol % DIPEA, 1.5 equiv *t*-butyl acrylate. <sup>e</sup>Isolated yield. <sup>f</sup>Determined by HPLC analysis of the corresponding methyl carbamate derivative (**S1**) using chiral stationary phase. Characterization data for pyrrolidine **10** and methyl carbamate **S1** have been reported previously.<sup>2</sup>

**Table S2.** Optimization of the catalytic, asymmetric double (1,3)-dipolar cycloaddition reaction.

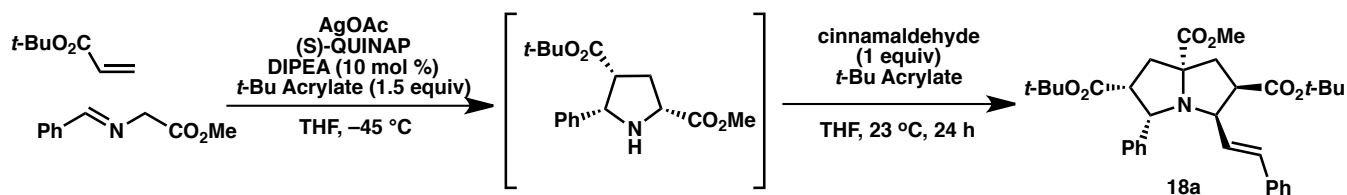

| entry | catalyst loading | additive   | time for first (1,3)-dipolar cycloaddition | equiv <i>t</i> -Bu-Acrylate in second (1,3)-dipolar cycloaddition | yield <sup>a</sup> | ee <sup>b</sup> |
|-------|------------------|------------|--------------------------------------------|-------------------------------------------------------------------|--------------------|-----------------|
|       | (mol %)          |            | (h)                                        |                                                                   | (%)                | (%)             |
| 1     | 3 mol %          | none       | 24                                         | 1.5                                                               | 74                 | 91              |
| 2     | 3 mol %          | none       | 24                                         | 5                                                                 | 90                 | 91              |
| 3     | 1 mol %          | none       | 24                                         | 5                                                                 | 64                 | 86              |
| 4     | 1 mol %          | mol sieves | 24                                         | 5                                                                 | 82                 | 88              |
| 5     | 1 mol %          | none       | 48                                         | 5                                                                 | 88                 | 90              |

<sup>a</sup>Isolated yield. <sup>b</sup>Determined by SFC analysis using chiral stationary phase

**5. Scale-up procedure for the double (3+2) cycloaddition reactions.** 18.8 mg silver (I) acetate (0.113 mmol) and 49.4 mg (*R*)-QUINAP (0.112 mmol) were added to a vial. Tetrahydrofuran (12.5 mL) was then introduced, and this solution was stirred at room temperature for 1 h to make a stock solution of 0.009 M silver(I)/(*R*)-QUINAP catalyst. Silver(I) acetate/(*R*)-QUINAP catalyst solution (10 mL, 0.09 mmol) followed by the 0.66 ml *tert*-butyl acrylate (4.5 mmol) and 52  $\mu$ l Hünig's base (0.30 mmol) were added to 532 mg of  $\alpha$ -iminoester **17a** (3.00 mmol) at -45 °C. The final concentration of the  $\alpha$ -iminoester was 0.3 M. After stirring for 24 hours, the reaction was allowed to warm to room temperature. 2.2 ml *t*-Bu Acrylate (15 mmol) and then 380  $\mu$ l cinnamaldehyde (3.0 mmol) were added. After stirring for 24 hours, the reaction was quenched with 2 mL of a tetrahydrofuran solution of acetic acid (10:1 v/v) and concentrated directly. The crude reaction mixture was purified by silica gel column chromatography (5→20% ethyl acetate in hexanes) to obtain 1.46 g pyrrolizidine **18a** in 89% yield and 87% ee.

## 6. Characterization data.

(2*R*,3*R*,5*R*,6*R*)-2,6-di-*tert*-butyl 7*a*-ethyl 3,5-di(*E*-styryl)hexahydro-1*H*-pyrrolizine-2,6,7*a*-tricarboxylate (**12**)

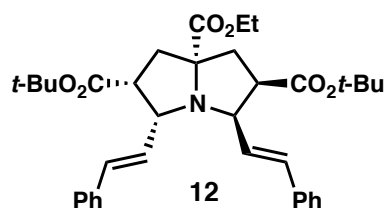

According to the general procedure pyrrolizidine **12** was obtained as a light yellow foam after silica gel column chromatography (5→20% ethyl acetate in

hexanes) in 73% yield and 90% ee. The enantiomeric excess was determined by chiral SFC analysis (OJ-H, 2.5 mL/min, 4% IPA in CO<sub>2</sub>,  $\lambda$  = 254 nm):  $t_R$  (major) = 5.2 min,  $t_R$  (minor) = 6.6 min.  $[\alpha]_D^{25} = -109.5$  (c = 1.01, CHCl<sub>3</sub>); <sup>1</sup>H NMR (CDCl<sub>3</sub>, 500 MHz)  $\delta$  7.40 – 7.36 (m, 2H), 7.35 – 7.23 (m, 7H), 7.19 – 7.15 (m, 1H), 6.63 (d,  $J$  = 15.5 Hz, 1H), 6.53 (d,  $J$  = 15.5 Hz, 1H), 6.20 (dd,  $J$  = 15.6, 7.7 Hz, 1H), 6.06 (dd,  $J$  = 15.5, 10.6 Hz, 1H), 4.30 (dd,  $J$  = 10.6, 7.6 Hz, 1H), 4.27 – 4.16 (m, 3H), 3.45 (ddd,  $J$  = 13.3, 7.6, 6.0 Hz, 1H), 3.08 (dt,  $J$  = 10.3, 7.7 Hz, 1H), 2.78 (dd,  $J$  = 13.5, 10.3 Hz, 1H), 2.49 (dd,  $J$  = 13.1, 6.0 Hz, 1H), 2.17 (dd,  $J$  = 13.5, 7.8 Hz, 1H), 2.11 (t,  $J$  = 13.0 Hz, 1H), 1.31 (t,  $J$  = 7.1 Hz, 3H), 1.30 (s, 9H), 1.28 (s, 9H); <sup>13</sup>C NMR (CDCl<sub>3</sub>, 126 MHz)  $\delta$  176.2, 170.5, 170.1, 137.1, 136.4, 136.2, 131.2, 128.6, 128.3, 128.2, 127.9, 127.1, 126.7, 126.4, 125.2, 80.8, 80.8, 75.5, 67.1, 64.4, 61.2, 50.8, 49.6, 37.4, 36.6, 28.1, 28.0, 14.3; FTIR (NaCl, thin film) 2978, 2932, 1727, 1495, 1477, 1449, 1392, 1367, 1257, 1152, 1029, 968, 848, 754 cm<sup>-1</sup>; HRMS (MM) calc'd for [M+H]<sup>+</sup> 588.3320, found 588.3284.

**(2*R*,3*S*,5*R*,6*R*,7*aR*)-2,6-di-*tert*-butyl 7*a*-methyl 3-phenyl-5-((*E*)-styryl)hexahydro-1*H*-pyrrolizine-2,6,7*a*-tricarboxylate (18*a*)**

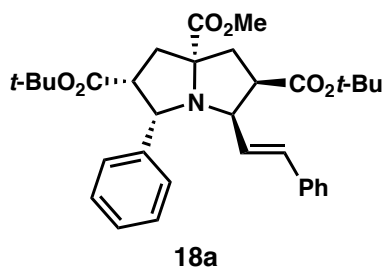

According to the general procedure pyrrolizidine **18a** was obtained as a white foam after silica gel column chromatography (5→20% ethyl acetate in hexanes) in 90% yield and 91% ee. The enantiomeric excess was determined by chiral SFC analysis (OD, 2.5 mL/min, 10% IPA in CO<sub>2</sub>,  $\lambda$  = 254 nm):  $t_R$  (major) = 6.1 min,  $t_R$  (minor) = 7.2 min.  $[\alpha]_D^{25} = -103.3$  (c = 0.74, CHCl<sub>3</sub>); <sup>1</sup>H

NMR (CDCl<sub>3</sub>, 500 MHz)  $\delta$  7.39 (d,  $J$  = 7.3 Hz, 2H), 7.30 – 7.24 (m, 6H), 7.21–7.10 (m, 2H), 6.30 (d,  $J$  = 15.6 Hz, 1H), 6.02 (dd,  $J$  = 15.6, 10.3 Hz, 1H), 4.78 (d,  $J$  = 8.3 Hz, 1H), 4.19 (dd,  $J$  = 10.3, 7.7 Hz, 1H), 3.79 (s, 3H), 3.61 (ddd,  $J$  = 12.1, 7.5, 6.5 Hz, 1H), 3.39 (td,  $J$  = 7.9, 3.8 Hz, 1H), 2.99 (dd,  $J$  = 13.2, 3.8 Hz, 1H), 2.37 (dd,  $J$  = 13.1, 6.5 Hz, 1H), 2.29 (dd,  $J$  = 19.1, 6.4 Hz, 1H), 2.12 (dd,  $J$  = 13.3, 7.7 Hz, 1H), 1.26 (s, 9H), 0.96 (s, 9H); <sup>13</sup>C NMR (CDCl<sub>3</sub>, 126 MHz)  $\delta$  177.1, 171.0, 170.9, 141.1, 136.4, 135.3, 128.5, 127.9, 127.8, 127.7, 126.7, 126.5, 126.3, 80.7, 80.2, 76.8, 65.2, 65.0, 52.9, 52.2, 51.3, 39.1, 39.0, 28.0, 27.4; FTIR (NaCl, thin film) 2977, 1726, 1493,

1453, 1391, 1367, 1293, 1255, 1204, 1151, 1094, 968, 845, 746  $\text{cm}^{-1}$ ; HRMS (MM) calc'd for  $[\text{M}+\text{H}]^+$  548.3007, found 548.3040.

**(2*R*,3*R*,5*S*,6*R*,7*aR*)-2,6-di-*tert*-butyl 7*a*-methyl 3-((*E*)-styryl)-5-(*o*-tolyl)hexahydro-1*H*-pyrrolizine-2,6,7*a*-tricarboxylate (18b)**

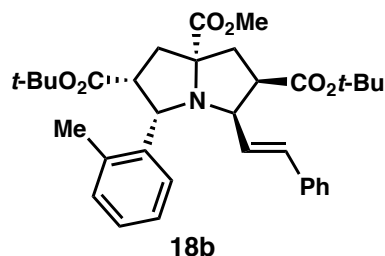

According to the general procedure pyrrolizidine **18b** was obtained as a white foam after silica gel column chromatography (5→20% ethyl acetate in hexanes) in 91% yield and 89% ee. The enantiomeric excess was determined by chiral SFC analysis (OD, 2.5 mL/min, 7% IPA in  $\text{CO}_2$ ,  $\lambda$  =

254 nm):  $t_R$  (major) = 10.0 min,  $t_R$  (minor) = 11.5 min.  $[\alpha]_D^{25} = -84.443$  ( $c$  = 0.95,  $\text{CHCl}_3$ );  $^1\text{H}$  NMR ( $\text{CDCl}_3$ , 500 MHz)  $\delta$  8.03 (d,  $J$  = 7.7 Hz, 1H), 7.32 – 7.15 (m, 6H), 7.10 (t,  $J$  = 7.4 Hz, 1H), 7.01 (d,  $J$  = 7.4 Hz, 1H), 6.22 (d,  $J$  = 15.6 Hz, 1H), 5.99 (dd,  $J$  = 15.6, 10.4 Hz, 1H), 4.93 (d,  $J$  = 8.2 Hz, 1H), 4.10 (dd,  $J$  = 10.2, 7.6 Hz, 1H), 3.82 (s, 3H), 3.65 (ddd,  $J$  = 13.5, 7.4, 0.8 Hz, 1H), 3.50 (t,  $J$  = 8.0 Hz, 1H), 3.05 (d,  $J$  = 13.1 Hz, 1H), 2.40 (dd,  $J$  = 13.5, 6.0 Hz, 1H), 2.35 (t,  $J$  = 12.8 Hz, 1H), 2.09 (dd,  $J$  = 13.1, 7.7 Hz, 1H), 1.28 (s, 9H), 0.90 (s, 9H);  $^{13}\text{C}$  NMR ( $\text{CDCl}_3$ , 126 MHz)  $\delta$  177.37, 171.20, 170.72, 138.66, 136.50, 135.55, 135.03, 129.21, 128.41, 127.58, 126.78, 126.48, 126.35, 125.89, 80.61, 79.95, 77.25, 77.00, 76.75, 76.22, 64.01, 61.95, 52.14, 51.32, 50.98, 39.80, 39.23, 27.99, 27.47, 27.21, 19.14; FTIR (NaCl, thin film) 2976, 1727, 1479, 1458, 1392, 1367, 1294, 1256, 1199, 1151, 1097, 1034, 967, 844, 749  $\text{cm}^{-1}$ ; HRMS (MM) calc'd for  $[\text{M}+\text{H}]^+$  562.3163, found 574.3159.

**(2*R*,3*R*,5*S*,6*R*,7*aR*)-2,6-di-*tert*-butyl 7*a*-methyl 3-((*E*)-styryl)-5-(*m*-tolyl)hexahydro-1*H*-pyrrolizine-2,6,7*a*-tricarboxylate (18c)**

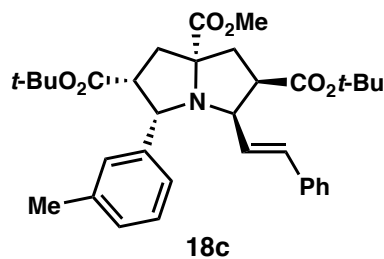

According to the general procedure using 6 mol%  $\text{AgOAc}$ /QUINAP, pyrrolizidine **18c** was obtained as a white foam after silica gel column chromatography (5→20% ethyl acetate in hexanes) in 76% yield and 88% ee. The enantiomeric excess was determined by chiral SFC analysis (OD, 2.5

mL/min, 7% IPA in CO<sub>2</sub>,  $\lambda$  = 254 nm):  $t_R$  (major) = 9.8 min,  $t_R$  (minor) = 11.4 min.  $[\alpha]_D^{25}$  = -236.413 (c = 0.93, CHCl<sub>3</sub>); <sup>1</sup>H NMR (CDCl<sub>3</sub>, 500 MHz)  $\delta$  7.34 – 7.09 (m, 7H), 6.98 (d,  $J$  = 7.4 Hz, 2H), 6.35 (d,  $J$  = 15.6 Hz, 1H), 6.05 (dd,  $J$  = 15.6, 10.3 Hz, 1H), 4.76 (d,  $J$  = 8.3 Hz, 1H), 4.22 (dd,  $J$  = 10.3, 7.7 Hz, 1H), 3.81 (s, 3H), 3.61 (ddd,  $J$  = 12.2, 7.5, 6.5 Hz, 1H), 3.38 (td,  $J$  = 7.9, 4.3 Hz, 1H), 3.00 (dd,  $J$  = 13.3, 4.3 Hz, 1H), 2.39 (dd,  $J$  = 13.1, 6.4 Hz, 1H), 2.30 (s, 3H), 2.14 (dd,  $J$  = 13.3, 7.8 Hz, 1H), 1.29 (s, 9H), 0.99 (s, 9H); <sup>13</sup>C NMR (CDCl<sub>3</sub>, 126 MHz)  $\delta$  177.1, 171.0, 170.9, 141.0, 137.0, 136.5, 135.3, 128.6, 128.5, 127.8, 127.7, 127.4, 126.5, 126.3, 125.0, 80.7, 80.1, 76.6, 65.2, 65.2, 52.8, 52.2, 51.1, 39.0, 38.9, 28.0, 27.4, 21.5; FTIR (NaCl, thin film) 2978, 2930, 1732, 1606, 1456, 1367, 1256, 1152, 1099, 1038, 969, 846, 740 cm<sup>-1</sup>; HRMS (MM) calc'd for [M+H]<sup>+</sup> 562.3163, found 562.3163.

**(2*R*,3*R*,5*S*,6*R*,7*aR*)-2,6-di-*tert*-butyl 7*a*-methyl 3-((*E*)-styryl)-5-(*p*-tolyl)hexahydro-1*H*-pyrrolizine-2,6,7*a*-tricarboxylate (18d)**

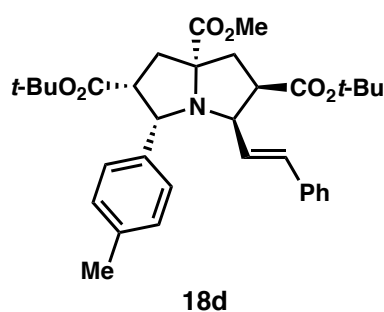

According to the general procedure using 6 mol% AgOAc/QUINAP, pyrrolizidine **18d** was obtained as a white foam after silica gel column chromatography (5→20% ethyl acetate in hexanes) in 92% yield and 90% ee. The enantiomeric excess was determined by chiral SFC analysis (AD, 2.5 mL/min, 7% IPA in CO<sub>2</sub>,  $\lambda$  = 254 nm):  $t_R$  (minor) = 10.2 min,  $t_R$  (major) =

11.3 min.  $[\alpha]_D^{25}$  = -178.7 (c = 0.85, CHCl<sub>3</sub>); <sup>1</sup>H NMR (CDCl<sub>3</sub>, 500 MHz)  $\delta$  7.34 – 7.19 (m, 7H), 7.05 (d,  $J$  = 7.8 Hz, 2H), 6.35 (d,  $J$  = 15.6 Hz, 1H), 6.04 (dd,  $J$  = 15.6, 10.3 Hz, 1H), 4.21 (dd,  $J$  = 10.2, 7.7 Hz, 1H), 3.81 (d,  $J$  = 0.7 Hz, 1H), 3.62 (dt,  $J$  = 13.2, 6.9 Hz, 1H), 3.38 (td,  $J$  = 8.1, 4.0 Hz, 1H), 3.00 (dd,  $J$  = 13.3, 4.0 Hz, 1H), 2.38 (dd,  $J$  = 13.2, 6.4 Hz, 1H), 2.30 (s, 1H), 2.13 (dd,  $J$  = 13.3, 7.6 Hz, 1H), 1.28 (s, 1H), 1.00 (s, 1H); <sup>13</sup>C NMR (CDCl<sub>3</sub>, 126 MHz)  $\delta$  177.1, 171.0, 170.9, 138.0, 136.5, 136.1, 135.2, 128.4, 128.4, 127.8, 127.7, 126.5, 126.4, 80.7, 80.1, 76.6, 65.1, 64.9, 52.9, 52.2, 51.2, 39.0, 28.0, 27.4, 21.0; FTIR (NaCl, thin film) 2977, 1727, 1512, 1495, 1477, 1457, 1367, 1151, 968, 848, 748 cm<sup>-1</sup>; HRMS (MM) calc'd for [M+H]<sup>+</sup> 562.3163, found 562.3170.

**(2*R*,3*S*,5*R*,6*R*,7*aR*)-2,6-di-*tert*-butyl 7*a*-methyl 3-(3,5-dimethylphenyl)-5-((*E*)-styryl)hexahydro-1*H*-pyrrolizine-2,6,7*a*-tricarboxylate (18e)**

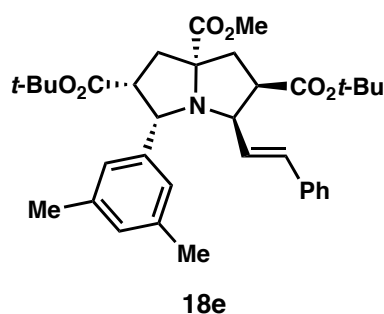

According to the general procedure using 6 mol% AgOAc/QUINAP, pyrrolizidine **18e** was obtained as a white foam after silica gel column chromatography (5→20% ethyl acetate in hexanes) in 78% yield and 88% ee.

The enantiomeric excess was determined by chiral SFC analysis (AD, 2.5 mL/min, 5% IPA in CO<sub>2</sub>, λ = 254 nm): *t<sub>R</sub>* (minor) = 9.0 min, *t<sub>R</sub>* (major) = 10.5

min.  $[\alpha]_D^{25} = -120.032$  (c = 0.86, CHCl<sub>3</sub>); <sup>1</sup>H NMR (CDCl<sub>3</sub>, 500 MHz) δ 7.33 – 7.22 (m, 6H), 6.97 (s, 1H), 6.80 (s, 1H), 6.38 (d, *J* = 15.6 Hz, 1H), 6.06 (dd, *J* = 15.6, 10.3 Hz, 1H), 4.72 (d, *J* = 8.3 Hz, 1H), 4.22 (dd, *J* = 10.3, 7.7 Hz, 1H), 3.82 (s, 1H), 3.61 (ddd, *J* = 12.3, 7.5, 6.5 Hz, 1H), 3.35 (td, *J* = 7.9, 4.8 Hz, 1H), 2.99 (dd, *J* = 13.3, 4.8 Hz, 1H), 2.39 (dd, *J* = 13.1, 6.4 Hz, 1H), 2.33 – 2.26 (m, 1H), 2.26 (s, 1H), 2.13 (dd, *J* = 13.3, 7.8 Hz, 1H), 1.29 (s, 9H), 1.00 (s, 9H).; <sup>13</sup>C NMR (CDCl<sub>3</sub>, 126 MHz) δ 177.09, 170.91, 170.86, 140.95, 136.89, 136.49, 135.28, 128.44, 128.29, 127.65, 126.53, 126.30, 125.68, 80.68, 80.02, 76.62, 65.34, 65.28, 52.66, 52.16, 51.04, 38.98, 38.69, 28.03, 27.38, 21.35; FTIR (NaCl, thin film) 2977, 1728, 1603, 1456, 1391, 1366, 1152, 968, 847, 747 cm<sup>-1</sup>; HRMS (MM) calc'd for [M+H]<sup>+</sup> 576.3320, found 576.3318.

**(2*R*,3*S*,5*R*,6*R*,7*aR*)-2,6-di-*tert*-butyl 7*a*-methyl 3-(4-fluorophenyl)-5-((*E*)-styryl)hexahydro-1*H*-pyrrolizine-2,6,7*a*-tricarboxylate (18f)**

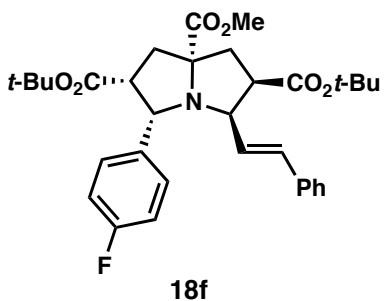

According to the general procedure pyrrolizidine **18f** was obtained as a white foam after silica gel column chromatography (5→20% ethyl acetate in hexanes) in 87% yield and 93% ee. The enantiomeric excess was determined by chiral SFC analysis (OJ, 2.5 mL/min, 4% IPA in CO<sub>2</sub>, λ = 254 nm): *t<sub>R</sub>*

(minor) = 7.8 min, *t<sub>R</sub>* (major) = 9.7 min.  $[\alpha]_D^{25} = -40.596$  (c = 0.79, CHCl<sub>3</sub>);

<sup>1</sup>H NMR (CDCl<sub>3</sub>, 500 MHz) δ 7.41 – 7.36 (m, 2H), 7.30 – 7.26 (m, 2H), 7.24 – 7.20 (m, 3H), 6.93 (t, *J* = 8.8 Hz, 2H), 6.29 (d, *J* = 15.6 Hz, 1H), 6.00 (dd, *J* = 15.6, 10.4 Hz, 1H), 4.76 (d, *J* = 8.2 Hz, 1H), 4.15 (dd, *J* = 10.3, 7.7

Hz, 1H), 3.79 (s, 3H), 3.59 (ddd,  $J = 12.2, 7.5, 6.5$  Hz, 1H), 3.36 (td,  $J = 7.8, 3.4$  Hz, 1H), 2.36 (dd,  $J = 13.1, 6.5$  Hz, 1H), 2.32 – 2.25 (m, 1H), 2.11 (dd,  $J = 13.3, 7.7$  Hz, 1H), 1.27 (s, 9H), 0.99 (s, 9H);  $^{13}\text{C}$  NMR ( $\text{CDCl}_3$ , 126 MHz)  $\delta$  177.0, 170.9, 170.8, 162.9, 160.9, 136.7, 136.7, 136.3, 135.3, 129.5, 129.4, 128.5, 127.8, 126.5, 126.1, 114.6, 114.4, 80.7, 80.3, 76.6, 64.7, 64.4, 53.0, 52.2, 51.3, 39.2, 39.0, 28.0, 27.5; FTIR (NaCl, thin film) 3435, 2978, 2931, 1726, 1603, 1507, 1457, 1392, 1367, 1153, 846,  $754\text{ cm}^{-1}$ ; HRMS (MM) calc'd for  $[\text{M}+\text{H}]^+$  566.2912, found 566.2909.

**(2*R*,3*S*,5*R*,6*R*,7*aR*)-2,6-di-*tert*-butyl 7*a*-methyl 3-(4-chlorophenyl)-5-((*E*)-styryl)hexahydro-1*H*-pyrrolizine-2,6,7*a*-tricarboxylate (18g)**

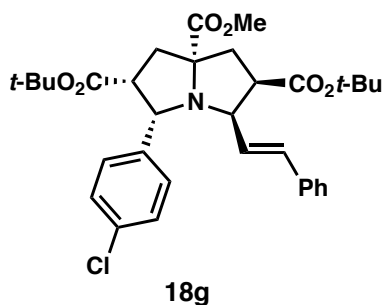

According to the general procedure pyrrolizidine **18g** was obtained as a yellow oil after silica gel column chromatography (5→20% ethyl acetate in hexanes) in 91% yield and 95% ee. The enantiomeric excess was determined by chiral SFC analysis (OJ, 2.5 mL/min, 2% IPA in  $\text{CO}_2$ ,  $\lambda = 254\text{ nm}$ ):  $t_R$  (major) = 6.2 min,  $t_R$  (minor) = 8.1 min.  $[\alpha]_D^{25} = -476.013$  ( $c = 0.98$ ,  $\text{CHCl}_3$ );

$^1\text{H}$  NMR ( $\text{CDCl}_3$ , 500 MHz)  $\delta$  7.39 (d,  $J = 8.4$  Hz, 2H), 7.30 – 7.17 (m, 7H), 6.30 (d,  $J = 15.6$  Hz, 1H), 6.01 (dd,  $J = 15.6, 10.4$  Hz, 1H), 4.77 (d,  $J = 8.2$  Hz, 1H), 4.16 (dd,  $J = 10.2, 7.7$  Hz, 1H), 3.78 (s, 3H), 3.62 (dt,  $J = 12.3, 6.9$  Hz, 1H), 3.38 (td,  $J = 7.9, 2.9$  Hz, 1H), 2.99 (dd,  $J = 13.2, 2.7$  Hz, 1H), 2.40 – 2.26 (m, 1H), 2.12 (dd,  $J = 13.3, 7.7$  Hz, 1H), 1.27 (s, 9H), 1.00 (s, 9H);  $^{13}\text{C}$  NMR ( $\text{CDCl}_3$ , 126 MHz)  $\delta$  176.8, 170.7, 170.5, 139.5, 136.1, 135.2, 132.2, 129.2, 128.4, 127.7, 127.7, 126.3, 126.0, 80.6, 80.2, 76.5, 64.5, 64.3, 52.9, 52.1, 51.2, 39.2, 38.9, 27.9, 27.3; FTIR (NaCl, thin film) 3431, 2977, 2932, 1727, 1489, 1456, 1292, 1151, 1088, 1014, 847,  $750\text{ cm}^{-1}$ ; HRMS (MM) calc'd for  $[\text{M}+\text{H}]^+$  582.2617, found 582.2611

**(2*R*,3*S*,5*R*,6*R*,7*aR*)-2,6-di-*tert*-butyl 7*a*-methyl 3-(4-bromophenyl)-5-((*E*)-styryl)hexahydro-1*H*-pyrrolizine-2,6,7*a*-tricarboxylate (18h)**

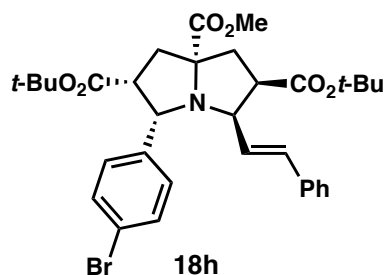

According to the general procedure pyrrolizidine **18h** was obtained as a white foam after silica gel column chromatography (5→20% ethyl acetate in hexanes) in 89% yield and 92% ee. The enantiomeric excess was determined by chiral SFC analysis (OJ, 2.5 mL/min, 3% IPA in CO<sub>2</sub>, λ = 254 nm): *t<sub>R</sub>* (major) = 6.1 min, *t<sub>R</sub>* (minor) = 8.0 min. [ $\alpha$ ]<sub>D</sub><sup>25</sup> = -59.159 (c = 0.70, CHCl<sub>3</sub>);

<sup>1</sup>H NMR (CDCl<sub>3</sub>, 500 MHz) δ 7.41 – 7.36 (m, 2H), 7.35 – 7.27 (m, 4H), 7.27 – 7.22 (m, 3H), 6.31 (d, *J* = 15.6 Hz, 1H), 6.00 (dd, *J* = 15.6, 10.4 Hz, 1H), 4.75 (d, *J* = 8.2 Hz, 1H), 4.16 (dd, *J* = 10.4, 7.6 Hz, 1H), 3.80 (s, 3H), 3.62 (ddd, *J* = 12.3, 7.4, 6.5 Hz, 1H), 3.38 (td, *J* = 7.8, 3.1 Hz, 1H), 2.99 (dd, *J* = 13.2, 3.1 Hz, 1H), 2.38 (dd, *J* = 13.2, 6.4 Hz, 1H), 2.35 – 2.25 (m, 1H), 2.11 (dd, *J* = 13.3, 7.7 Hz, 1H), 1.28 (s, 9H), 1.01 (s, 9H); <sup>13</sup>C NMR (CDCl<sub>3</sub>, 126 MHz) 177.0, 170.9, 170.7, 140.2, 136.2, 135.4, 130.8, 129.8, 128.5, 127.8, 126.5, 126.1, 120.4, 80.8, 80.4, 76.6, 64.7, 64.5, 53.0, 52.2, 51.3, 39.4, 39.0, 28.0, 27.4; FTIR (NaCl, thin film) 3447, 2978, 2932, 1728, 1586, 1456, 1393, 1368, 1257, 1151, 1011, 845, 739 cm<sup>-1</sup>; HRMS (MM) calc'd for [M+H]<sup>+</sup> 626.2112, found 626.2096.

**(2*R*,3*S*,5*R*,6*R*,7*aR*)-2,6-di-*tert*-butyl 7*a*-methyl 3-(4-nitrophenyl)-5-((*E*)-styryl)hexahydro-1*H*-pyrrolizine-2,6,7*a*-tricarboxylate (**18i**)**

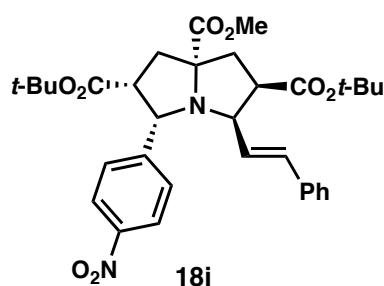

According to the general procedure pyrrolizidine **18i** was obtained as a yellow foam after silica gel column chromatography (5→20% ethyl acetate in hexanes) in 70% yield and 96% ee. The enantiomeric excess was determined by chiral SFC analysis (OJ, 2.5 mL/min, 2% IPA in CO<sub>2</sub>, λ = 254 nm): *t<sub>R</sub>* (major) = 3.8 min, *t<sub>R</sub>* (minor) = 5.2 min. [ $\alpha$ ]<sub>D</sub><sup>25</sup> = -101.586 (c = 0.77, CHCl<sub>3</sub>);

<sup>1</sup>H NMR (CDCl<sub>3</sub>, 500 MHz) δ 8.13 (d, *J* = 8.8 Hz, 2H), 7.66 (d, *J* = 8.6 Hz, 2H), 7.31 – 7.19 (m, 5H), 6.27 (d, *J* = 15.6 Hz, 1H), 6.00 (dd, *J* = 15.6, 10.4 Hz, 1H), 4.88 (d, *J* = 8.2 Hz, 1H), 4.16 (dd, *J* = 10.4, 7.6 Hz, 1H), 3.81 (s, 3H), 3.65 (ddd, *J* = 12.2, 7.4, 6.8 Hz, 1H), 3.47 (td, *J* = 7.9, 2.6 Hz, 1H), 3.03 (dd, *J* = 13.2, 2.6 Hz, 1H), 2.38 (dd, *J* = 14.5, 8.0 Hz, 1H), 2.37 – 2.29 (m, 1H), 2.16 (dd, *J* = 13.3, 7.7 Hz, 1H), 1.28 (s, 9H), 0.98 (s, 9H); <sup>13</sup>C NMR



(CDCl<sub>3</sub>, 126 MHz)  $\delta$  176.7, 170.5, 170.5, 149.2, 146.9, 135.9, 135.7, 128.8, 128.5, 128.0, 126.4, 125.6, 123.0, 80.9, 80.7, 76.7, 64.6, 64.4, 53.1, 52.3, 51.3, 39.6, 39.0, 28.0, 27.4; FTIR (NaCl, thin film) 2978, 1727, 1598, 1522, 1457, 1392, 1367, 1346, 1294, 1249, 1199, 1151, 850, 745 cm<sup>-1</sup>; HRMS (MM) calc'd for [M+H]<sup>+</sup> 593.2857, found 593.2854.

**(2*R*,3*S*,5*R*,6*R*,7*aR*)-2,6-di-*tert*-butyl 7*a*-methyl 3-(4-cyanophenyl)-5-((*E*)-styryl)hexahydro-1*H*-pyrrolizine-2,6,7*a*-tricarboxylate (18j)**

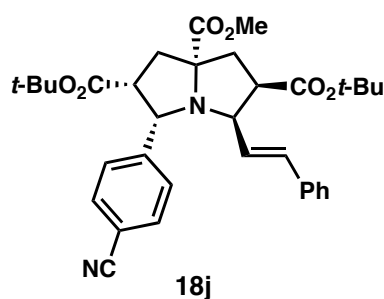

According to the general procedure pyrrolizidine **18j** was obtained as a yellow foam after silica gel column chromatography (5→20% ethyl acetate in hexanes) in 80% yield and 96% ee. The enantiomeric excess was determined by chiral SFC analysis (OJ, 2.5 mL/min, 4% IPA in CO<sub>2</sub>,  $\lambda$  = 254 nm):  $t_R$  (major) = 5.7 min,  $t_R$  (minor) = 7.1 min.  $[\alpha]_D^{25} = -57.101$  (c = 0.70, CHCl<sub>3</sub>);

<sup>1</sup>H NMR (CDCl<sub>3</sub>, 500 MHz)  $\delta$  7.62 – 7.53 (m, 4H), 7.31 – 7.19 (m, 5H), 6.27 (d,  $J$  = 15.6 Hz, 1H), 5.99 (dd,  $J$  = 15.6, 10.4 Hz, 1H), 4.84 (d,  $J$  = 8.2 Hz, 1H), 4.14 (dt,  $J$  = 7.1, 5.9 Hz, 1H), 3.79 (s, 3H), 3.67 – 3.57 (m, 1H), 3.44 (td,  $J$  = 7.9, 2.7 Hz, 1H), 3.01 (dd,  $J$  = 13.2, 2.6 Hz, 1H), 2.38 (dd,  $J$  = 13.2, 6.6 Hz, 1H), 2.35 ? 2.28 (m, 1H), 2.14 (dd,  $J$  = 13.3, 7.8 Hz, 1H), 1.28 (s, 9H), 0.97 (s, 9H); <sup>13</sup>C NMR (CDCl<sub>3</sub>, 126 MHz)  $\delta$  176.8, 170.6, 170.6, 147.2, 136.0, 135.7, 131.7, 128.8, 128.6, 128.0, 126.5, 125.8, 119.2, 110.4, 80.9, 80.9, 80.6, 76.8, 64.7, 64.6, 53.0, 52.3, 51.4, 39.6, 39.1, 28.0, 27.5; FTIR (NaCl, thin film) 3453, 2978, 2931, 1732, 1608, 1456, 1393, 1368, 1257, 1151, 844, 738 cm<sup>-1</sup>; HRMS (MM) calc'd for [M+H]<sup>+</sup> 573.2959, found 573.2924.

**(2*R*,3*S*,5*R*,6*R*,7*aR*)-2,6-di-*tert*-butyl 7*a*-methyl 3-(4-methoxyphenyl)-5-((*E*)-styryl)hexahydro-1*H*-pyrrolizine-2,6,7*a*-tricarboxylate (18k)**

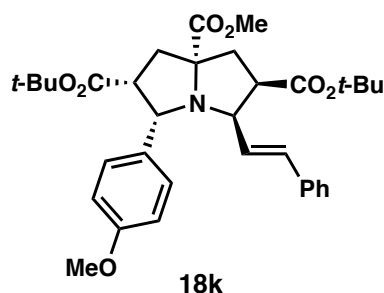

According to the general procedure using 6 mol% AgOAc/QUINAP in 0.1M THF, pyrrolizidine **18k** was obtained as a yellow foam after silica gel column chromatography (5→20% ethyl acetate in hexanes) in 86% yield and 90% ee.

The enantiomeric excess was determined by chiral SFC analysis (AD, 2.5 mL/min, 7% IPA in CO<sub>2</sub>,  $\lambda$  = 254 nm):  $t_R$  (minor) = 9.8 min,  $t_R$  (major) = 10.5 min.  $[\alpha]_D^{25}$  = -201.710 (c = 0.94, CHCl<sub>3</sub>); <sup>1</sup>H NMR (CDCl<sub>3</sub>, 500 MHz)  $\delta$  7.36 – 7.20 (m, 7H), 6.80 (d,  $J$  = 8.7 Hz, 2H), 6.34 (d,  $J$  = 15.6 Hz, 1H), 6.04 (dd,  $J$  = 15.6, 10.3 Hz, 1H), 4.75 (d,  $J$  = 8.3 Hz, 1H), 4.19 (dd,  $J$  = 10.3, 7.7 Hz, 1H), 3.80 (s, 3H), 3.77 (s, 3H), 3.65 – 3.56 (m, 1H), 3.36 (td,  $J$  = 7.9, 4.0 Hz, 1H), 2.99 (dd,  $J$  = 13.3, 4.0 Hz, 1H), 2.38 (dd,  $J$  = 13.1, 6.4 Hz, 1H), 2.34 – 2.26 (m, 1H), 2.13 (dd,  $J$  = 13.3, 7.8 Hz, 1H), 1.28 (s, 9H), 1.01 (s, 9H); <sup>13</sup>C NMR (CDCl<sub>3</sub>, 126 MHz)  $\delta$  177.1, 171.0, 170.9, 158.5, 136.4, 135.1, 133.2, 128.9, 128.4, 127.7, 126.5, 126.3, 113.2, 80.6, 80.1, 76.5, 65.0, 64.6, 55.3, 52.9, 52.2, 51.2, 38.9, 38.9, 28.0, 27.5; FTIR (NaCl, thin film) 2977, 1726, 1603, 1511, 1367, 1248, 1151, 1034, 845, 752 cm<sup>-1</sup>; HRMS (MM) calc'd for [M+H]<sup>+</sup> 578.3112, found 578.3119.

**(2*R*,3*R*,5*S*,6*R*,7*aR*)-2,6-di-*tert*-butyl 7*a*-methoxy 3-((*E*)-styryl)-5-(*o*-tolyl)hexahydro-1*H*-pyrrolizine-2,6,7*a*-tricarboxylate (**18l**)**

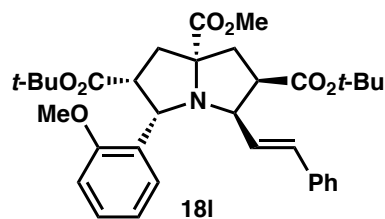

According to the general procedure pyrrolizidine **18l** was obtained as a white foam after silica gel column chromatography (5→20% ethyl acetate in hexanes) in 72% yield and 90% ee. The enantiomeric excess was determined by chiral SFC analysis (OD, 2.5 mL/min, 15% IPA in CO<sub>2</sub>,  $\lambda$  = 254 nm):  $t_R$

(major) = 4.0 min,  $t_R$  (minor) = 4.6 min.  $[\alpha]_D^{25}$  = -188.252 (c = 1.0, CHCl<sub>3</sub>); <sup>1</sup>H NMR (CDCl<sub>3</sub>, 500 MHz)  $\delta$  7.89 (dd,  $J$  = 7.5, 1.2 Hz, 1H), 7.30 – 7.23 (m, 3H), 7.23 – 7.12 (m, 3H), 6.95 (t,  $J$  = 7.3 Hz, 1H), 6.71 (d,  $J$  = 8.0 Hz, 1H), 6.23 (d,  $J$  = 15.6 Hz, 1H), 6.02 (dd,  $J$  = 15.6, 10.4 Hz, 1H), 5.01 (d,  $J$  = 7.8 Hz, 1H), 4.14 (dd,  $J$  = 10.3, 7.6 Hz, 1H), 3.79 (s, 3H), 3.63 (s, 3H), 3.55 (td,  $J$  = 7.7, 1.5 Hz, 1H), 3.01 (d,  $J$  = 12.8 Hz, 1H), 2.35 (dd,  $J$  = 9.4, 4.0 Hz, 2H), 2.10 (dd,  $J$  = 13.1, 7.7 Hz, 1H), 1.28 (s, 9H), 0.93 (s, 9H); <sup>13</sup>C NMR (CDCl<sub>3</sub>, 126 MHz)  $\delta$  177.5, 171.8, 170.7, 157.0, 136.7, 134.8, 129.2, 129.0, 128.3, 127.4, 127.4, 127.0, 126.5, 120.3, 109.3, 80.6, 79.6, 76.2, 64.4, 59.6, 55.0, 52.1, 51.5, 51.3, 39.7, 39.3, 36.6, 28.0, 27.3, 24.6; FTIR (NaCl, thin film) 2977, 2949, 1723, 1600, 1489, 1458, 1437, 1391, 1367, 1294, 1242, 1152, 1106, 1031, 968, 848, 756 cm<sup>-1</sup>; HRMS (MM) calc'd for [M+H]<sup>+</sup> 578.3112, found 578.3137.

**(2*R*,3*S*,5*R*,6*R*,7*aR*)-2,6-di-*tert*-butyl 7*a*-methyl 3-(2-chlorophenyl)-5-((*E*)-styryl)hexahydro-1*H*-pyrrolizine-2,6,7*a*-tricarboxylate (18*m*)**

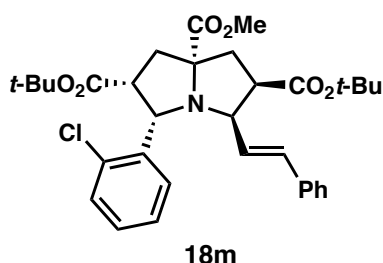

According to the general procedure pyrrolizidine **18m** was obtained as a white foam after silica gel column chromatography (5→20% ethyl acetate in hexanes) in 87% yield and 94% ee. The enantiomeric excess was determined by chiral SFC analysis (OJ, 2.5 mL/min, 2% IPA in CO<sub>2</sub>, λ = 254 nm): *t<sub>R</sub>* (minor) = 5.3 min, *t<sub>R</sub>* (major) = 6.2 min. [ $\alpha$ ]<sub>D</sub><sup>25</sup> = -76.881 (c = 0.75, CHCl<sub>3</sub>);

<sup>1</sup>H NMR (CDCl<sub>3</sub>, 500 MHz) δ 8.08 (dd, *J* = 7.7, 1.6 Hz, 1H), 7.29 – 7.18 (m, 7H), 7.14 (td, *J* = 7.6, 1.7 Hz, 1H), 6.23 (d, *J* = 15.6 Hz, 1H), 5.99 (dd, *J* = 15.6, 10.4 Hz, 1H), 5.11 (d, *J* = 8.1 Hz, 1H), 4.09 (dd, *J* = 10.6, 7.8 Hz, 1H), 3.80 (s, 3H), 3.67 (td, *J* = 7.8, 1.5 Hz, 1H), 3.62 (dt, *J* = 11.8, 7.1 Hz, 1H), 3.04 (d, *J* = 13.0 Hz, 1H), 2.40 (dd, *J* = 13.0, 6.7 Hz, 1H), 2.38 – 2.32 (m, 1H), 2.12 (dd, *J* = 13.2, 7.7 Hz, 1H), 1.29 (s, 9H), 0.94 (s, 9H); <sup>13</sup>C NMR (CDCl<sub>3</sub>, 126 MHz) 177.2, 171.2, 170.6, 138.4, 136.5, 135.4, 133.5, 130.5, 128.4, 128.3, 127.9, 127.6, 126.6, 126.5, 126.2, 80.7, 80.0, 76.4, 64.1, 62.3, 52.2, 51.4, 50.8, 39.7, 39.1, 28.0, 27.3; FTIR (NaCl, thin film) 3444, 2978, 1728, 1456, 1393, 1367, 1256, 1205, 1152, 1034, 969, 844, 752 cm<sup>-1</sup>; HRMS (MM) calc'd for [M+H]<sup>+</sup> 582.2617, found 582.2617.

**(2*R*,3*S*,5*R*,6*R*,7*aR*)-2,6-di-*tert*-butyl 7*a*-methyl 3-(2-bromophenyl)-5-((*E*)-styryl)hexahydro-1*H*-pyrrolizine-2,6,7*a*-tricarboxylate (18*n*)**

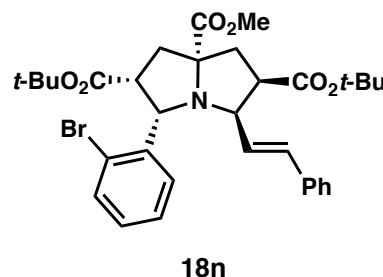

According to the general procedure pyrrolizidine **18n** was obtained as a white foam after silica gel column chromatography (5→20% ethyl acetate in hexanes) in 89% yield and 93% ee. The enantiomeric excess was determined by chiral SFC analysis (OJ, 2.5 mL/min, 3% IPA in CO<sub>2</sub>, λ = 254 nm): *t<sub>R</sub>* (minor) = 4.4 min, *t<sub>R</sub>* (major) = 5.0 min. [ $\alpha$ ]<sub>D</sub><sup>25</sup> = -85.978 (c = 0.88, CHCl<sub>3</sub>);

<sup>1</sup>H NMR (CDCl<sub>3</sub>, 500 MHz) δ 8.09 (dd, *J* = 7.7, 1.6 Hz, 1H), 7.41 (dd, *J* = 7.9, 1.0 Hz, 1H), 7.35 – 7.15 (m, 6H),

7.07 (td,  $J = 7.6, 1.7$  Hz, 1H), 6.23 (d,  $J = 15.6$  Hz, 1H), 5.98 (dd,  $J = 15.6, 10.4$  Hz, 1H), 5.07 (d,  $J = 8.1$  Hz, 1H), 4.08 (dd,  $J = 10.3, 7.5$  Hz, 1H), 3.81 (s, 3H), 3.70 (td,  $J = 7.9, 1.2$  Hz, 1H), 3.61 (dt,  $J = 11.7, 7.2$  Hz, 1H), 3.04 (d,  $J = 13.1$  Hz, 1H), 2.42 – 2.32 (m, 2H), 2.12 (dd,  $J = 13.2, 7.7$  Hz, 1H), 1.29 (s, 9H), 0.94 (s, 9H);  $^{13}\text{C}$  NMR ( $\text{CDCl}_3$ , 126 MHz)  $\delta$  177.2, 171.2, 170.6, 139.9, 136.5, 135.5, 131.7, 130.9, 128.3, 128.3, 127.6, 127.3, 126.5, 126.2, 123.9, 80.7, 80.0, 76.5, 64.7, 64.0, 52.2, 51.4, 50.7, 39.7, 39.2, 28.0, 27.3; FTIR (NaCl, thin film) 2977, 1727, 1457, 1392, 1367, 1293, 1257, 1203, 1151, 1094, 1022, 968, 843, 751  $\text{cm}^{-1}$ ; HRMS (MM) calc'd for  $[\text{M}+\text{H}]^+$  626.2112, found 628.2134.

**(2R,3S,5R,6R,7aR)-2,6-di-*tert*-butyl 7a-methyl 3-(3-bromophenyl)-5-((*E*)-styryl)hexahydro-1H-pyrrolizine-2,6,7a-tricarboxylate (18o)**

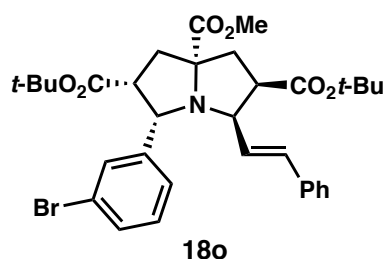

According to the general procedure pyrrolizidine **18o** was obtained as a white foam after silica gel column chromatography (5→20% ethyl acetate in hexanes) in 82% yield and 92% ee. The enantiomeric excess was determined by chiral SFC analysis (OJ, 2.5 mL/min, 2% IPA in  $\text{CO}_2$ ,  $\lambda = 254$  nm):  $t_R$

(minor) = 6.9 min,  $t_R$  (major) = 8.0 min.  $[\alpha]_D^{25} = -102.419$  ( $c = 0.67$ ,  $\text{CHCl}_3$ );  $^1\text{H}$  NMR ( $\text{CDCl}_3$ , 500 MHz)  $\delta$  7.63 (s, 1H), 7.38 – 7.20 (m, 6H), 7.13 (t,  $J = 7.8$  Hz, 2H), 6.33 (d,  $J = 15.6$  Hz, 1H), 6.01 (dd,  $J = 15.6, 10.4$  Hz, 1H), 4.77 (d,  $J = 8.3$  Hz, 1H), 4.18 (dd,  $J = 10.3, 7.7$  Hz, 1H), 3.82 (s, 3H), 3.61 (ddd,  $J = 12.4, 7.4, 6.6$  Hz, 1H), 3.40 (td,  $J = 7.9, 3.3$  Hz, 1H), 2.99 (dd,  $J = 13.2, 3.3$  Hz, 1H), 2.40 (dd,  $J = 13.1, 6.4$  Hz, 1H), 2.31 (t,  $J = 12.8$  Hz, 1H), 2.12 (dd,  $J = 13.3, 7.7$  Hz, 1H), 1.29 (s, 9H), 1.02 (s, 9H);  $^{13}\text{C}$  NMR ( $\text{CDCl}_3$ , 126 MHz)  $\delta$  176.9, 170.7, 170.6, 143.8, 136.2, 135.5, 131.0, 129.8, 129.5, 128.5, 127.8, 126.5, 125.9, 122.1, 80.8, 80.5, 76.7, 64.7, 64.5, 53.0, 52.2, 51.2, 39.3, 39.0, 28.0, 27.4; FTIR (NaCl, thin film) 2978, 1728, 1594, 1569, 1456, 1393, 1367, 1293, 1257, 1204, 1151, 969, 845, 746  $\text{cm}^{-1}$ ; HRMS (MM) calc'd for  $[\text{M}+\text{H}]^+$  626.2112, found 626.2127.

**(2R,3S,5R,6R,7aR)-2,6-di-*tert*-butyl 7a-methyl 3-(naphthalen-2-yl)-5-((*E*)-styryl)hexahydro-1H-pyrrolizine-2,6,7a-tricarboxylate (18p)**

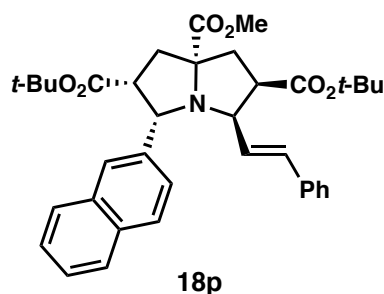

According to the general procedure using 6 mol% AgOAc/QUINAP in 0.1M THF, pyrrolizidine **18p** was obtained as a yellow foam after silica gel column chromatography (5→20% ethyl acetate in hexanes) in 93% yield and 92% ee. The enantiomeric excess was determined by chiral SFC analysis (AD, 2.5 mL/min, 7% IPA in CO<sub>2</sub>, λ = 254 nm): *t<sub>R</sub>* (major) = 6.0 min, *t<sub>R</sub>* (minor) = 9.8

min. [ $\alpha$ ]<sub>D</sub><sup>25</sup> = -387.655 (c = 0.93, CHCl<sub>3</sub>); <sup>1</sup>H NMR (CDCl<sub>3</sub>, 500 MHz) δ 7.97 (s, 1H), 7.85 – 7.77 (m, 2H), 7.74 (d, *J* = 8.5 Hz, 1H), 7.52 (dd, *J* = 8.5, 1.6 Hz, 1H), 7.47 – 7.40 (m, 2H), 7.30 – 7.19 (m, 4H), 6.29 (d, *J* = 15.6 Hz, 1H), 6.09 (dd, *J* = 15.6, 10.3 Hz, 1H), 4.99 (d, *J* = 8.2 Hz, 1H), 4.27 (dd, *J* = 10.3, 7.6 Hz, 1H), 3.86 (s, 3H), 3.74 – 3.65 (m, 1H), 3.50 (td, *J* = 7.8, 3.4 Hz, 1H), 3.08 (dd, *J* = 13.2, 3.3 Hz, 1H), 2.45 (dd, *J* = 13.1, 6.4 Hz, 1H), 2.38 (t, *J* = 12.7 Hz, 1H), 2.19 (dd, *J* = 13.2, 7.7 Hz, 1H), 1.30 (s, 9H), 0.82 (s, 9H); <sup>13</sup>C NMR (CDCl<sub>3</sub>, 126 MHz) δ 177.11, 170.96, 170.71, 138.60, 136.30, 135.25, 133.30, 132.77, 128.40, 127.91, 127.66, 127.39, 127.18, 126.46, 126.41, 126.25, 125.47, 125.11, 80.68, 80.12, 76.64, 65.26, 64.83, 53.11, 52.19, 51.25, 39.26, 39.05, 27.99, 27.22; FTIR (NaCl, thin film) 2977, 1727, 1457, 1391, 1368, 1256, 1199, 1151, 845, 751 cm<sup>-1</sup>; HRMS (MM) calc'd for [M+H]<sup>+</sup> 598.3163, found 598.3155.

**(2R,3S,5R,6R)-di-tert-butyl 3-(naphthalen-1-yl)-5-((E)-styryl)hexahydro-1H-pyrrolizine-2,6-dicarboxylate (18q)**

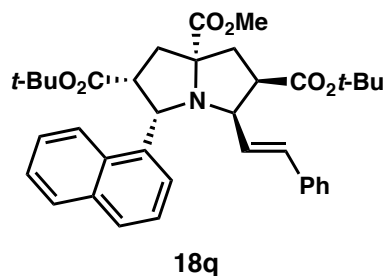

According to the general procedure using 6 mol% AgOAc/QUINAP, pyrrolizidine **18q** was obtained as a white foam after silica gel column chromatography (5→20% ethyl acetate in hexanes) in 84% yield and 93% ee. The enantiomeric excess was determined by chiral SFC analysis (AD, 2.5 mL/min, 7% IPA in CO<sub>2</sub>, λ = 254 nm): *t<sub>R</sub>* (minor) = 8.4 min, *t<sub>R</sub>* (major) = 9.8

min. [ $\alpha$ ]<sub>D</sub><sup>25</sup> = -188.706 (c = 0.82, CHCl<sub>3</sub>); <sup>1</sup>H NMR (CDCl<sub>3</sub>, 500 MHz) δ 8.30 (d, *J* = 7.1 Hz, 1H), 7.88 (d, *J* = 8.3 Hz, 1H), 7.83 (dd, *J* = 8.1, 1.2 Hz, 1H), 7.72 (d, *J* = 8.1 Hz, 1H), 7.54 – 7.47 (m, 1H), 7.38 (dddd, *J* = 22.6, 8.2, 6.8, 1.3 Hz, 2H), 7.20 – 7.13 (m, 3H), 7.01 – 6.98 (m, 2H), 6.17 (d, *J* = 15.6 Hz, 1H), 6.00 (dd, *J* = 15.6, 10.3 Hz,

1H), 5.56 (d,  $J = 8.4$  Hz, 1H), 4.19 (dd,  $J = 10.2, 7.5$  Hz, 1H), 3.84 (s, 3H), 3.77 (td,  $J = 8.0, 1.8$  Hz, 1H), 3.70 (dt,  $J = 11.2, 7.4$  Hz, 1H), 3.11 (dd,  $J = 13.0, 1.5$  Hz, 1H), 2.45 (dd,  $J = 9.3, 3.3$  Hz, 2H), 2.19 (dd,  $J = 13.1, 7.7$  Hz, 1H), 1.28 (s, 9H), 0.53 (s, 9H);  $^{13}\text{C}$  NMR ( $\text{CDCl}_3$ , 126 MHz)  $\delta$  177.3, 171.1, 170.9, 136.4, 136.3, 135.3, 133.4, 131.7, 128.3, 128.3, 127.5, 127.2, 126.6, 126.4, 125.9, 125.3, 124.8, 123.3, 80.7, 79.6, 76.3, 64.4, 61.5, 52.3, 52.2, 51.5, 40.0, 39.2, 28.0, 26.9; FTIR (NaCl, thin film) 2977, 1727, 1596, 1457, 1391, 1367, 1152, 968, 775, 752  $\text{cm}^{-1}$ ; HRMS (MM) calc'd for  $[\text{M}+\text{H}]^+$  598.3163, found 598.3156.

**(2*R*,3*S*,5*R*,6*R*,7*aR*)-2,6-di-*tert*-butyl 7*a*-methyl 3-(pyridin-3-yl)-5-((*E*)-styryl)hexahydro-1*H*-pyrrolizine-2,6,7*a*-tricarboxylate (18r)**

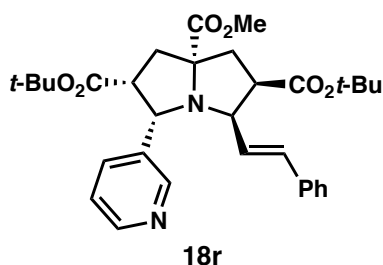

According to the general procedure pyrrolizidine **18r** was obtained as a yellow foam after silica gel column chromatography (5→20% ethyl acetate in hexanes) in 90% yield and 90% ee. The enantiomeric excess was determined by chiral SFC analysis (OJ, 2.5 mL/min, 20% IPA in  $\text{CO}_2$ ,  $\lambda = 254$  nm):  $t_R$  (major) = 2.7 min,  $t_R$  (minor) = 3.7 min.  $[\alpha]_D^{25} = -218.400$  ( $c = 0.79$ ,  $\text{CHCl}_3$ );

$^1\text{H}$  NMR ( $\text{CDCl}_3$ , 500 MHz)  $\delta$  8.53 (s, 1H), 8.43 (d,  $J = 4.7$  Hz, 1H), 7.92 (d,  $J = 7.8$  Hz, 1H), 7.32 – 7.18 (m, 6H), 6.31 (d,  $J = 15.6$  Hz, 1H), 6.01 (dd,  $J = 15.6, 10.4$  Hz, 1H), 4.83 (d,  $J = 8.3$  Hz, 1H), 4.15 (dd,  $J = 10.2, 7.7$  Hz, 1H), 3.80 (s, 3H), 3.59 (dt,  $J = 12.1, 7.0$  Hz, 1H), 3.44 (td,  $J = 8.0, 3.4$  Hz, 1H), 3.01 (dd,  $J = 13.2, 3.4$  Hz, 1H), 2.40 (dd,  $J = 13.2, 6.5$  Hz, 1H), 2.31 (t,  $J = 12.7$  Hz, 1H), 2.15 (dd,  $J = 13.3, 7.7$  Hz, 1H), 1.27 (s, 9H), 0.98 (s, 9H);  $^{13}\text{C}$  NMR ( $\text{CDCl}_3$ , 126 MHz)  $\delta$  176.78, 170.62, 149.35, 147.87, 136.89, 136.00, 135.63, 128.50, 127.89, 126.46, 125.69, 123.19, 80.83, 80.61, 76.63, 64.78, 62.65, 52.75, 52.28, 51.26, 39.26, 38.90, 27.98, 27.40; FTIR (NaCl, thin film) 2978, 1730, 1586, 1457, 1420, 1369, 1256, 1152, 1026, 844, 737  $\text{cm}^{-1}$ ; HRMS (MM) calc'd for  $[\text{M}+\text{H}]^+$  549.2954, found 549.2954.

**(2*R*,3*S*,5*R*,6*R*,7*aR*)-2,6-di-*tert*-butyl 7*a*-methyl 3-(pyridin-2-yl)-5-((*E*)-styryl)hexahydro-1*H*-pyrrolizine-2,6,7*a*-tricarboxylate (18s)**

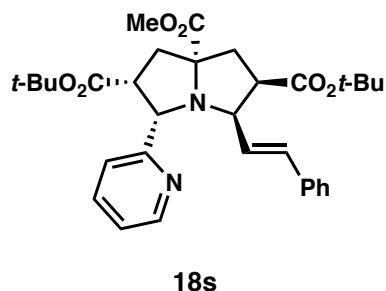

According to the general procedure pyrrolizidine **18s** was obtained as a white foam after silica gel column chromatography (5→20% ethyl acetate in hexanes) in 33% yield and 44% ee. The enantiomeric excess was determined by chiral SFC analysis (AD, 2.5 mL/min, 20% IPA in CO<sub>2</sub>, λ = 254 nm): *t<sub>R</sub>* (major) = 2.2 min, *t<sub>R</sub>* (minor) = 3.9 min. [ $\alpha$ ]<sub>D</sub><sup>25</sup> = -68.157 (c = 0.92, CHCl<sub>3</sub>);

<sup>1</sup>H NMR (500 MHz, CDCl<sub>3</sub>) δ 8.41 (d, *J* = 4.1 Hz, 1H), 7.72 (d, *J* = 7.8 Hz, 2H), 7.67 – 7.55 (m, 2H), 7.26 – 7.19 (m, 2H), 7.08 (dd, *J* = 6.5, 5.1 Hz, 2H), 6.45 (dd, *J* = 22.7, 15.6 Hz, 1H), 6.04 (dt, *J* = 28.1, 14.0 Hz, 1H), 4.83 (d, *J* = 7.9 Hz, 1H), 4.26 (dt, *J* = 22.8, 11.4 Hz, 1H), 3.75 (d, *J* = 8.7 Hz, 2H), 3.68 – 3.59 (m, 1H), 3.51 (td, *J* = 8.0, 5.5 Hz, 1H), 3.08 (dd, *J* = 13.3, 5.4 Hz, 1H), 2.38 – 2.35 (m, 1H), 2.34 (d, *J* = 3.1 Hz, 1H), 2.22 (dt, *J* = 15.5, 7.8 Hz, 1H), 1.31 – 1.20 (m, 8H), 1.06 (s, 7H); <sup>13</sup>C NMR (126 MHz, CDCl<sub>3</sub>) δ 177.04, 170.94, 170.47, 161.47, 136.22, 135.97, 128.47, 127.85, 126.66, 125.49, 122.60, 121.63, 80.80, 80.20, 76.64, 66.44, 66.06, 52.27, 52.18, 50.80, 39.08, 38.87, 28.06, 27.54; FTIR (NaCl, thin film) 2976, 1726, 1589, 1457, 1434, 1366, 1256, 1151, 968, 847, 751 cm<sup>-1</sup>; HRMS (MM) calc'd for [M+H]<sup>+</sup> 549.2959, found 549.2908.

**(2R,3S,5R,6R,7aR)-2-tert-butyl 6,7a-dimethyl 3-phenyl-5-((E)-styryl)hexahydro-1H-pyrrolizine-2,6,7a-tricarboxylate (19a)**

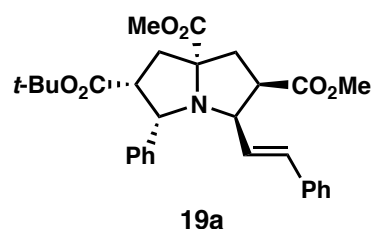

According to the general procedure using 1.1 equivalents of *t*-Bu acrylate in the first (1,3)-dipolar cycloaddition and methyl acrylate as the dipolarophile in the second (1,3)-dipolar cycloaddition, pyrrolizidine **19a** was obtained as a white foam after silica gel column chromatography (5→20% ethyl acetate in

hexanes) in 92% yield and 90% ee. The enantiomeric excess was determined by chiral SFC analysis (AD, 2.5 mL/min, 10% IPA in CO<sub>2</sub>, λ = 254 nm): *t<sub>R</sub>* (major) = 7.6 min, *t<sub>R</sub>* (minor) = 9.4 min. [ $\alpha$ ]<sub>D</sub><sup>25</sup> = -96.513 (c = 0.94, CHCl<sub>3</sub>); <sup>1</sup>H NMR (CDCl<sub>3</sub>, 500 MHz) δ 7.42 – 7.38 (m, 2H), 7.32 – 7.21 (m, 6H), 7.19 – 7.15 (m, 2H), 6.34 (d, *J* = 15.6 Hz, 1H), 6.03 (dd, *J* = 15.6, 10.3 Hz, 1H), 4.83 (d, *J* = 8.4 Hz, 1H), 4.28 (dd, *J* = 10.2, 7.8 Hz, 1H), 3.82 (s, 3H), 3.70 (ddd, *J* = 11.9, 7.7, 6.8 Hz, 1H), 3.56 (s, 3H), 3.44 (td, *J* = 7.8, 4.5 Hz, 1H), 3.03 (dd, *J* = 13.3, 4.5 Hz,

1H), 2.45 (dd,  $J = 13.2, 6.6$  Hz, 1H), 2.37 (dd,  $J = 13.2, 11.9$  Hz, 1H), 2.19 (dd,  $J = 13.3, 7.8$  Hz, 1H), 0.98 (s, 9H);  $^{13}\text{C}$  NMR ( $\text{CDCl}_3$ , 126 MHz)  $\delta$  176.8, 172.4, 170.8, 140.9, 136.4, 135.3, 128.5, 127.9, 127.8, 127.8, 126.8, 126.6, 125.8, 80.3, 76.8, 65.3, 52.6, 52.3, 51.8, 50.5, 39.1, 38.7, 27.4; FTIR (NaCl, thin film) 3450, 2978, 1730, 1493, 1451, 1367, 1152, 970, 844, 747  $\text{cm}^{-1}$ ; HRMS (MM) calc'd for  $[\text{M}+\text{H}]^+$  506.2537, found 506.2523.

**(2R,3S,5R,6R,7aS)-2-tert-butyl 7a-methyl 3-phenyl-6-(phenylsulfonyl)-5-((E)-styryl)hexahydro-1H-pyrrolizine-2,7a-dicarboxylate (19b)**

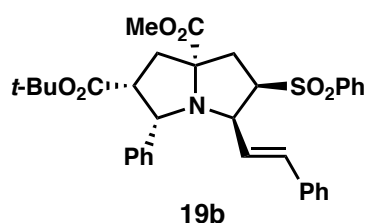

According to the general procedure using 1.1 equivalents of *t*-Bu acrylate in the first (1,3)-dipolar cycloaddition and vinyl sulphone as the dipolarophile in the second (1,3)-dipolar cycloaddition, pyrrolizidine **19b** was obtained as a white foam after silica gel column chromatography (5→20% ethyl acetate in hexanes)

in 64% yield and 90% ee. The enantiomeric excess was determined by chiral SFC analysis (AD, 2.5 mL/min, 10% IPA in  $\text{CO}_2$ ,  $\lambda = 254$  nm):  $t_R$  (minor) = 3.9 min,  $t_R$  (major) = 4.6 min;  $[\alpha]_{\text{D}}^{25} = -10.465$  ( $c = 0.87$ ,  $\text{CHCl}_3$ );  $^1\text{H}$  NMR ( $\text{CDCl}_3$ , 500 MHz)  $\delta$  7.77 (dd,  $J = 8.3, 1.1$  Hz, 2H), 7.55 (t,  $J = 7.5$  Hz, 2H), 7.42 – 7.10 (m, 11H), 6.28 (dd,  $J = 15.6, 10.6$  Hz, 1H), 5.96 (d,  $J = 15.6$  Hz, 1H), 4.87 (d,  $J = 8.6$  Hz, 1H), 4.41 – 4.29 (m, 1H), 3.98 (dd,  $J = 10.5, 7.0$  Hz, 1H), 3.80 (s, 3H), 3.43 (ddd,  $J = 16.7, 10.2, 6.2$  Hz, 1H), 3.07 (dd,  $J = 13.2, 3.8$  Hz, 1H), 2.69 (dd,  $J = 13.0, 6.4$  Hz, 1H), 2.56 (t,  $J = 12.5$  Hz, 1H), 2.14 (dd,  $J = 13.3, 7.8$  Hz, 1H), 0.95 (s, 9H);  $^{13}\text{C}$  NMR ( $\text{CDCl}_3$ , 126 MHz)  $\delta$  175.8, 170.8, 140.4, 138.9, 136.1, 135.6, 133.6, 128.8, 128.4, 128.4, 127.8, 127.8, 126.8, 126.7, 124.0, 80.3, 75.8, 68.0, 64.6, 64.0, 52.4, 52.1, 38.9, 36.9, 27.3, 27.3; FTIR (NaCl, thin film) 2979, 1726, 1446, 1367, 1305, 1248, 1148, 1085, 749, 722  $\text{cm}^{-1}$ ; HRMS (MM) calc'd for  $[\text{M}+\text{H}]^+$  588.2414, found 588.2407.

**(2R,3S,5R,6R,7S,7aS)-2-tert-butyl 7a-methyl 6-formyl-3,7-diphenyl-5-((E)-styryl)hexahydro-1H-pyrrolizine-2,7a-dicarboxylate (19c)**

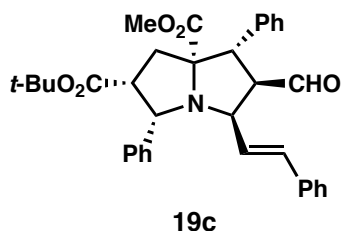

According to the general procedure using 1.1 equivalents of *t*-Bu acrylate in the first (1,3)-dipolar cycloaddition and cinnamaldehyde as the dipolarophile in the



second (1,3)-dipolar cycloaddition, pyrrolizidine **19c** was obtained as a white foam after silica gel column chromatography (5→20% ethyl acetate in hexanes) in 90% yield and 90% ee. The enantiomeric excess was determined by chiral SFC analysis (OB-H, 2.5 mL/min, 10% IPA in CO<sub>2</sub>,  $\lambda$  = 254 nm):  $t_R$ (minor) = 3.7 min,  $t_R$ (major) = 4.9 min;  $[\alpha]_D^{25}$  = -39.981 (c = 0.96, CHCl<sub>3</sub>); <sup>1</sup>H NMR (CDCl<sub>3</sub>, 500 MHz)  $\delta$  9.64 (d,  $J$  = 1.8 Hz, 1H), 7.37 – 7.11 (m, 14H), 6.44 (d,  $J$  = 15.5 Hz, 1H), 6.14 (dd,  $J$  = 15.5, 10.7 Hz, 1H), 4.87 (d,  $J$  = 7.9 Hz, 1H), 4.79 (dd,  $J$  = 10.7, 8.1 Hz, 1H), 4.55 (ddd,  $J$  = 12.0, 8.1, 1.7 Hz, 1H), 3.86 (d,  $J$  = 12.1 Hz, 1H), 3.47 (td,  $J$  = 7.9, 4.5 Hz, 1H), 3.30 (s, 3H), 3.04 (dd,  $J$  = 13.5, 4.6 Hz, 1H), 2.40 (dd,  $J$  = 13.6, 7.9 Hz, 1H), 1.33 – 1.23 (m, 1H), 1.01 (s, 9H); <sup>13</sup>C NMR (CDCl<sub>3</sub>, 126 MHz)  $\delta$  199.9, 174.1, 170.5, 140.4, 136.1, 136.0, 135.9, 128.5, 128.5, 128.1, 127.9, 127.6, 127.4, 126.8, 126.7, 125.8, 81.8, 80.4, 64.6, 63.1, 60.1, 54.2, 52.7, 51.4, 37.3, 27.4; FTIR (NaCl, thin film) 2978, 1728, 1495, 1452, 1391, 1367, 1204, 1152, 1073, 747 cm<sup>-1</sup>; HRMS (MM) calc'd for [M+H]<sup>+</sup> 552.2744, found 552.2712.

**(2R,3R,5S,6R,7aS)-6-tert-butyl 2,7a-dimethyl 2-methyl-5-phenyl-3-((E)-styryl)hexahydro-1H-pyrrolizidine-2,6,7a-tricarboxylate (19d)**

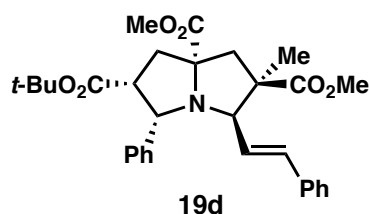

According to the general procedure using 1.1 equivalents of *t*-Bu acrylate in the first (1,3)-dipolar cycloaddition and methyl methacrylate as the dipolarophile in the second (1,3)-dipolar cycloaddition, pyrrolizidine **19d** was obtained as a white foam after silica gel column chromatography (5→20% ethyl acetate in

hexanes) in 91% yield and 90% ee. The enantiomeric excess was determined by chiral SFC analysis (OB-H, 2.5 mL/min, 10% IPA in CO<sub>2</sub>,  $\lambda$  = 254 nm):  $t_R$ (major) = 2.8 min,  $t_R$ (minor) = 3.3 min;  $[\alpha]_D^{25}$  = -67.966 (c = 0.97, CHCl<sub>3</sub>); <sup>1</sup>H NMR (CDCl<sub>3</sub>, 500 MHz)  $\delta$  7.45 (dd,  $J$  = 8.1, 1.0 Hz, 1H), 7.26 – 7.17 (m, 6H), 7.13 – 7.07 (m, 3H), 6.39 (d,  $J$  = 15.6 Hz, 1H), 5.99 (dd,  $J$  = 15.6, 9.7 Hz, 1H), 5.02 (d,  $J$  = 9.0 Hz, 1H), 3.90 (d,  $J$  = 9.3 Hz, 1H), 3.84 (s, 3H), 3.64 (s, 3H), 3.56 (ddd,  $J$  = 9.0, 7.8, 6.3 Hz, 1H), 3.02 (dd,  $J$  = 13.2, 6.3 Hz, 1H), 2.78 (d,  $J$  = 13.8 Hz, 1H), 2.36 – 2.28 (m, 2H), 1.38 (s, 3H), 0.99 (s, 9H); <sup>13</sup>C NMR (CDCl<sub>3</sub>, 126 MHz)  $\delta$  176.8, 176.8, 170.9, 142.1, 136.7, 134.6, 128.3, 128.2, 127.7, 127.5, 126.7, 126.4, 125.1, 80.2, 76.9, 75.0, 65.4, 56.1, 56.1, 52.3, 51.9, 50.4,

48.0, 39.0, 27.4, 23.1; FTIR (NaCl, thin film) 2950, 1727, 1493, 1433, 1450, 1367, 1253, 1152, 1121, 969, 746  $\text{cm}^{-1}$ ; HRMS (MM) calc'd for  $[\text{M}+\text{H}]^+$  520.2694, found 520.2644.

**(2*R*,3*S*,5*R*,6*R*,7*R*,7*aS*)-2-*tert*-butyl 7*a*-methyl 6-nitro-3,7-diphenyl-5-((*E*)-styryl)hexahydro-1*H*-pyrrolizine-2,7*a*-dicarboxylate (**19e**)**

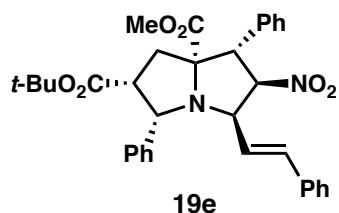

According to the general procedure using 1.1 equivalents of *t*-Bu acrylate in the first (1,3)-dipolar cycloaddition and crotonaldehyde as the dipolarophile in the second (1,3)-dipolar cycloaddition, pyrrolizidine **19e** was obtained as a yellow foam after silica gel column chromatography (5→20% ethyl acetate in hexanes)

in 89% yield and 90% ee. The enantiomeric excess was determined by chiral SFC analysis (OJ, 2.5 mL/min, 10% IPA in  $\text{CO}_2$ ,  $\lambda = 254 \text{ nm}$ ):  $t_{\text{R}}$  (minor) = 6.0 min,  $t_{\text{R}}$  (major) = 7.4 min;  $[\alpha]_{\text{D}}^{25} = -27.059$  ( $c = 0.98$ ,  $\text{CHCl}_3$ );  $^1\text{H}$  NMR ( $\text{CDCl}_3$ , 500 MHz)  $\delta$  7.40 – 7.15 (m, 15H), 6.48 (d,  $J = 15.5 \text{ Hz}$ , 1H), 6.22 – 6.11 (m, 1H), 5.05 (d,  $J = 8.1 \text{ Hz}$ , 1H), 4.94 (dd,  $J = 10.1, 8.0 \text{ Hz}$ , 1H), 4.23 (d,  $J = 11.1 \text{ Hz}$ , 1H), 3.59 (td,  $J = 7.9, 4.9 \text{ Hz}$ , 1H), 3.38 (s, 3H), 3.12 (dd,  $J = 13.6, 4.9 \text{ Hz}$ , 1H), 2.48 (dd,  $J = 13.7, 7.9 \text{ Hz}$ , 1H), 1.02 (s, 9H);  $^{13}\text{C}$  NMR ( $\text{CDCl}_3$ , 126 MHz)  $\delta$  173.2, 170.2, 139.9, 138.2, 135.6, 133.7, 128.8, 128.4, 128.3, 128.3, 127.9, 127.5, 127.1, 127.0, 126.8, 122.0, 92.1, 80.6, 80.5, 65.3, 64.8, 57.2, 51.6, 51.5, 37.1, 27.4; FTIR (NaCl, thin film) 2949, 1730, 1550, 1452, 1205, 1152, 1074, 911, 734  $\text{cm}^{-1}$ ; HRMS (MM) calc'd for  $[\text{M}+\text{H}]^+$  569.2646, found 569.2632.

**(2*R*,3*S*,5*R*,6*R*,7*R*,7*aS*)-2-*tert*-butyl 7*a*-methyl 6-formyl-7-methyl-3-phenyl-5-((*E*)-styryl)hexahydro-1*H*-pyrrolizine-2,7*a*-dicarboxylate (**19f**)**

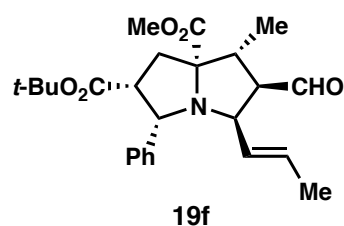

According to the general procedure using 1.1 equivalents of *t*-Bu acrylate in the first (1,3)-dipolar cycloaddition and crotonaldehyde as the dipolarophile in the second (1,3)-dipolar cycloaddition, pyrrolizidine **19f** was obtained as a white foam after silica gel column chromatography (5→20% ethyl acetate in hexanes)

in 59% yield (3:1 mixture of diastereomers) and 90% ee. The enantiomeric excess was determined by chiral SFC

analysis (AD, 2.5 mL/min, 5% IPA in CO<sub>2</sub>,  $\lambda$  = 254 nm):  $t_R$  (major) = 5.9 min,  $t_R$  (minor) = 6.7 min;  $[\alpha]_D^{25}$  = -39.981 (c = 0.96, CHCl<sub>3</sub>); <sup>1</sup>H NMR (CDCl<sub>3</sub>, 500 MHz)  $\delta$  9.56 (d,  $J$  = 1.6 Hz, 1H), 7.30 – 7.20 (m, 5H), 5.50 (dq,  $J$  = 14.8, 6.5 Hz, 1H), 5.27 (ddd,  $J$  = 15.0, 10.9, 1.6 Hz, 1H), 4.70 (d,  $J$  = 7.9 Hz, 1H), 4.36 (dd,  $J$  = 10.8, 8.2 Hz, 1H), 3.78 (s, 3H), 3.48 (ddd,  $J$  = 11.7, 8.2, 1.5 Hz, 1H), 3.33 – 3.26 (m, 1H), 3.00 (dd,  $J$  = 13.6, 5.3 Hz, 1H), 2.44 (tt,  $J$  = 13.6, 6.8 Hz, 1H), 2.04 (dd,  $J$  = 13.6, 7.9 Hz, 1H), 1.61 (dd,  $J$  = 6.5, 1.5 Hz, 3H), 1.03 (s, 9H); <sup>13</sup>C NMR (CDCl<sub>3</sub>, 126 MHz)  $\delta$  201.2, 175.3, 170.6, 141.0, 132.6, 128.3, 127.8, 127.8, 127.6, 127.6, 127.4, 126.7, 80.3, 80.3, 77.3, 77.0, 76.8, 64.4, 63.3, 62.3, 52.6, 51.7, 43.3, 36.8, 27.5, 17.7, 13.7; FTIR (NaCl, thin film) 2976, 2932, 1732, 1453, 1367, 1367, 974, 745 cm<sup>-1</sup>; HRMS (MM) calc'd for [M+H]<sup>+</sup> 428.2431, found 428.2431.

**(2*S*,3*R*,5*S*,6*S*,7*aS*)-2,6-bis(*tert*-butoxycarbonyl)-3-phenyl-5-((*E*)-styryl)hexahydro-1*H*-pyrrolizine-7*a*-carboxylic acid (**20**)**

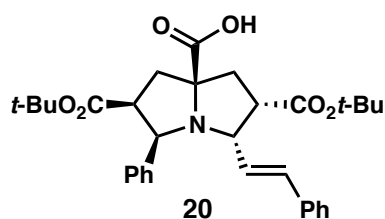

20 mg of pyrrolizidine **18a** was dissolved in 0.4 ml THF. 4.4 mg of LiOH was dissolved in 0.4 ml of H<sub>2</sub>O and then transferred to the organic solution. The reaction was allowed to stir for 14 h and then quenched with 1 ml of 10% NaH<sub>2</sub>PO<sub>4</sub> and extracted with 1 ml DCM 3 times. The organic solution was

then dried with MgSO<sub>4</sub>, filtered, and concentrated. The crude mixture was then purified (5→20% ethyl acetate in hexanes) to afford 14 mg of **21** in 74% yield. <sup>1</sup>H NMR (500 MHz, CDCl<sub>3</sub>)  $\delta$  7.32 – 7.22 (m, 6H), 7.12 (dd,  $J$  = 7.6, 1.7 Hz, 4H), 6.32 (d,  $J$  = 15.5 Hz, 1H), 5.98 (dd,  $J$  = 15.5, 10.5 Hz, 1H), 4.87 (d,  $J$  = 7.7 Hz, 1H), 4.29 (dd,  $J$  = 10.4, 7.8 Hz, 1H), 3.45 (tdd,  $J$  = 7.6, 6.0, 3.9 Hz, 2H), 2.88 (dd,  $J$  = 13.9, 2.5 Hz, 1H), 2.74 (dd,  $J$  = 13.3, 6.5 Hz, 1H), 2.47 – 2.33 (m, 2H), 1.28 (s, 9H), 1.04 (s, 9H); <sup>13</sup>C NMR (126 MHz, CDCl<sub>3</sub>)  $\delta$  176.83, 171.33, 169.92, 138.32, 136.48, 135.82, 128.54, 128.37, 128.18, 127.54, 127.21, 126.56, 123.56, 81.67, 81.41, 78.12, 77.28, 77.02, 76.77, 66.20, 65.71, 53.40, 51.37, 38.80, 38.53, 27.99, 27.42; FTIR (NaCl, thin film) 2977, 2928, 1725, 1495, 1454, 1367, 1250, 1151, 1030, 970, 845, 744 cm<sup>-1</sup>; HRMS (MM) calc'd for [M+H]<sup>+</sup> 534.2832, found 534.285.

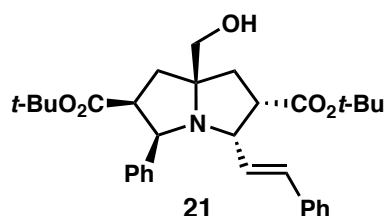

**(2*R*,3*S*,5*R*,6*R*,7*aR*)-di-*tert*-butyl 7*a*-(hydroxymethyl)-3-phenyl-5-((*E*)-styryl)hexahydro-1*H*-pyrrolizine-2,6-dicarboxylate (**21**)**

20 mg of pyrrolizidine **18a** was dissolved in 0.73 ml THF and put to 0 °C.

0.11 ml of 1 M LiEt<sub>3</sub>BH in THF was added drop-wise. The reaction was then

quenched with 1 ml of saturated aqueous NH<sub>4</sub>Cl and extracted with 1 ml DCM 3 times. The organic solution was then dried with MgSO<sub>4</sub>, filtered, and concentrated. The crude mixture was then purified (5→20% ethyl acetate in hexanes) to afford 14 mg of **21** in 74% yield. <sup>1</sup>H NMR (500 MHz, CDCl<sub>3</sub>) δ 7.26 (dd, *J* = 8.1, 1.0 Hz, 2H), 7.15 – 7.06 (m, 4H), 7.06 – 6.99 (m, 2H), 6.94 – 6.91 (m, 2H), 6.29 (d, *J* = 15.6 Hz, 1H), 5.90 (dd, *J* = 15.6, 9.8 Hz, 1H), 4.89 (d, *J* = 9.4 Hz, 1H), 4.15 – 4.05 (m, 1H), 3.48 (s, 2H), 3.47 – 3.42 (m, 1H), 3.18 (dd, *J* = 17.4, 8.7 Hz, 1H), 2.62 (dd, *J* = 13.5, 6.5 Hz, 1H), 2.17 (dd, *J* = 13.4, 9.1 Hz, 1H), 2.03 (dd, *J* = 13.5, 8.9 Hz, 1H), 1.95 (dd, *J* = 13.4, 8.4 Hz, 1H), 1.22 (s, 9H), 0.90 (s, 9H); <sup>13</sup>C NMR (126 MHz, CDCl<sub>3</sub>) δ 173.15, 172.26, 141.97, 136.59, 134.14, 128.32, 128.23, 127.92, 127.51, 126.87, 126.31, 126.09, 80.87, 80.41, 77.28, 77.02, 76.77, 75.48, 66.18, 65.77, 65.54, 51.63, 50.12, 38.22, 36.07, 29.72, 28.01, 27.40; FTIR (NaCl, thin film) 2975, 2928, 1722, 1493, 1452, 1367, 1249, 1151, 1030, 970, 846, 743 cm<sup>-1</sup>; HRMS (MM) calc'd for [M+H]<sup>+</sup> 520.3012, found 520.3012.

**(2*S*,3*R*,5*S*,6*S*,7*aS*)-2,6-dicarboxy-7*a*-(methoxycarbonyl)-3-phenyl-5-((*E*)-styryl)octahydropyrrolizin-4-ium 2,2,2-trifluoroacetate (**22**)**

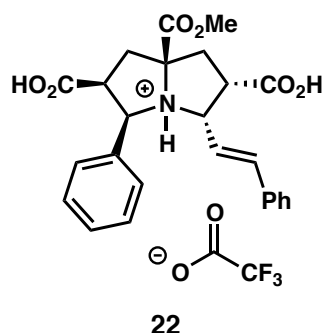

To a stirring solution of triester *ent*-**18a** (204 mg, 0.372 mmol) in 2.6 mL of CH<sub>2</sub>Cl<sub>2</sub> was added triethylsilane (0.29 mL, 1.8 mmol), followed by 1.0 mL of trifluoroacetic acid. The resulting solution was stirred for 20 h, and subsequently concentrated *in vacuo*. The crude residue was dissolved in 4 mL of Et<sub>2</sub>O, and added dropwise to 30 mL of vigorously stirring hexanes, resulting in precipitation of a white solid (the reaction vessel was rinsed twice with 2 mL of Et<sub>2</sub>O, and the rinsates added to the

hexanes mixture). The solids were isolated by filtration to afford 180 mg (88% yield) of trifluoroacetate salt **22** as a white amorphous solid. [α]<sub>D</sub><sup>25</sup> = +171.4° (c = 1.04, MeOH); <sup>1</sup>H NMR (CDCl<sub>3</sub>, 500 MHz) δ 9.89 (s, 3H), 7.36 –

7.26 (m, 10H), 6.52 (d,  $J = 15.5$  Hz, 1H), 6.23 (dd,  $J = 15.5, 10.5$  Hz, 1H), 5.16 (d,  $J = 7.4$  Hz, 1H), 4.68 (dd,  $J = 10.5, 7.6$  Hz, 1H), 3.84 (s, 3H), 3.67 – 3.60 (m, 1H), 2.97 (dd,  $J = 13.9, 3.4$  Hz, 1H), 2.69 – 2.55 (m, 3H);  $^{13}\text{C}$  NMR ( $\text{CDCl}_3$ , 126 MHz)  $\delta$  173.8, 173.6, 171.5, 160.7 (q,  $J_{\text{C-F}} = 36.5$  Hz), 140.9, 136.1, 134.8, 129.9, 129.7, 129.6, 129.5, 128.4, 127.9, 120.0, 117.2 (q,  $J_{\text{C-F}} = 290.8$  Hz), 81.1, 69.5, 68.8, 54.5, 52.3, 50.3, 38.8, 38.1; FTIR (NaCl, thin film) 2960, 2530, 1955, 1907, 1732, 1652, 1495, 1454, 1439, 1409, 1318, 1263, 1193, 1141, 976, 797, 750  $\text{cm}^{-1}$ ; HRMS (MM) calc'd for  $[\text{M}-\text{C}_2\text{F}_3\text{O}_2]^+$  436.1760, found 436.1779.

**(3a*R*,5*R*,6*S*,7a*R*,8a*S*)-7a-(methoxycarbonyl)-1-oxo-5-phenyloctahydro-1*H*-furo[3,4-*b*]pyrrolizine-6-carboxylic acid (23)**

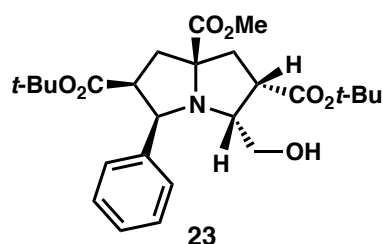

A solution of styrene *ent*-**18a** (150 mg, 0.274 mmol) and *p*-toluenesulfonic acid hydrate (261 mg, 1.37 mmol) in 2.8 mL of EtOAc was cooled to  $-78^\circ\text{C}$  with stirring. Ozone was bubbled through the solution until it became a pale blue suspension. The suspension was then sparged with oxygen (until the blue

color no longer persisted), warmed to  $0^\circ\text{C}$  in an ice bath, and diluted with 2.8 mL of saturated aqueous  $\text{NaHCO}_3$ . Sodium borohydride (104 mg, 2.75 mmol) was added portionwise, and the resulting mixture was stirred vigorously at  $0^\circ\text{C}$  for 1 h. An additional portion of sodium borohydride (104 mg, 2.75 mmol) was added, and vigorous stirring continued at  $0^\circ\text{C}$  for 1 h. A final portion of sodium borohydride (52 mg, 1.37 mmol) was added, and vigorous stirring continued at  $0^\circ\text{C}$  for 1 h. The reaction mixture was then further diluted with saturated aqueous  $\text{NaHCO}_3$  and extracted with EtOAc (5 x 5 mL) (**NOTE:** effervescence was allowed to subside prior to extraction), and the combined organic layers were dried over  $\text{Na}_2\text{SO}_4$ , filtered, and concentrated *in vacuo*. The resulting residue was subjected to silica gel column chromatography (50:1  $\rightarrow$  10:1  $\text{CH}_2\text{Cl}_2$ -Et $_2\text{O}$ ), to afford 83 mg (64% yield) of a white foam.  $[\alpha]_{\text{D}}^{25} = +346.27$  ( $c = 0.98$ ,  $\text{CHCl}_3$ );  $^1\text{H}$  NMR ( $\text{CDCl}_3$ , 500 MHz)  $\delta$  7.48 – 7.42 (m, 2H), 7.29 – 7.24 (m, 2H), 7.21 – 7.17 (m, 1H), 4.83 (d,  $J = 8.9$  Hz, 1H), 3.79 (s, 3H), 3.68 – 3.60 (m, 2H), 3.57 – 3.48 (m, 2H), 3.28 (dd,  $J = 16.7, 8.2$  Hz, 1H), 2.95 (dd,  $J = 13.0, 5.8$  Hz, 1H), 2.41 (dd,  $J = 13.1, 7.9$  Hz, 1H), 2.32 – 2.23 (m, 2H), 2.20 (dd,  $J = 8.7, 5.0$  Hz, 1H), 1.49 (s, 9H), 0.96 (s, 9H);  $^{13}\text{C}$  NMR ( $\text{CDCl}_3$ , 126 MHz)  $\delta$

176.56, 174.21, 170.85, 141.72, 128.11, 127.91, 127.17, 81.90, 80.16, 77.26, 77.00, 76.75, 64.83, 64.01, 60.67, 52.25, 51.25, 49.13, 39.75, 37.40, 27.98, 27.38; FTIR (NaCl, thin film) 3502, 2977, 2929, 1729, 1478, 1456, 1392, 1367, 1303, 1252, 1209, 1152, 1094, 1042, 919, 845, 735  $\text{cm}^{-1}$ ; HRMS (MM) calc'd for  $[\text{M}+\text{H}]^+$  476.2643, found 476.2644.

**(2*R*,3*R*,5*R*,6*R*)-2,6-dicarboxy-7a-(ethoxycarbonyl)-3,5-di((*E*)-styryl)octahydropyrrolizin-4-ium** **2,2,2-trifluoroacetate (S-2)**

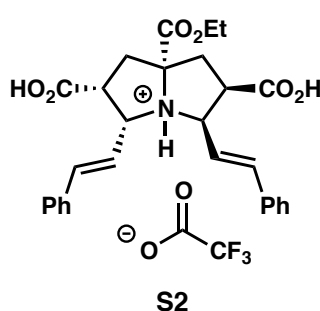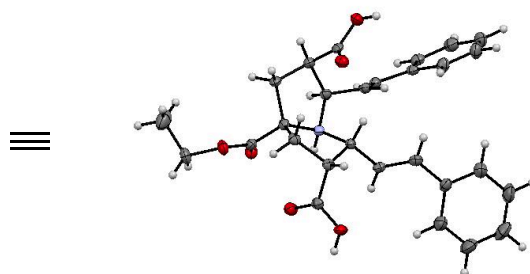

**(trifluoroacetate counterion omitted for clarity)**

To a stirring solution of triester **12** (racemic, 191 mg, 0.325 mmol) in 2.3 mL of  $\text{CH}_2\text{Cl}_2$  was added triethylsilane (0.26 mL, 1.6 mmol), followed by 0.93 mL of trifluoroacetic acid. The resulting solution was stirred for 24 h, and subsequently concentrated *in vacuo*. The crude residue was suspended in 3 mL of EtOAc, and added dropwise to 35 mL of vigorously stirring hexanes, resulting in precipitation of a white solid (the reaction vessel was rinsed twice with 2 mL of EtOAc, and the rinsates added to the hexanes mixture). The solids were isolated by filtration to afford 153 mg (80% yield) of trifluoroacetate salt **S-2** as a white amorphous solid. Crystals suitable for X-ray diffraction analysis (XRD) were obtained by vapor diffusion of pentane into a saturated solution of **S-2** in acetone.  $^1\text{H}$  NMR (acetone- $d_6$ , 500 MHz)  $\delta$  9.88 (s, 3H), 7.54 – 7.50 (m, 2H), 7.38 – 7.26 (m, 7H), 7.25 – 7.20 (m, 1H), 6.85 (d,  $J$  = 15.5 Hz, 1H), 6.74 (dd,  $J$  = 15.7, 1.1 Hz, 1H), 6.50 (dd,  $J$  = 15.5, 10.6 Hz, 1H), 6.34 (dd,  $J$  = 15.7, 7.6 Hz, 1H), 4.72 (dd,  $J$  = 10.6, 7.5 Hz, 1H), 4.63 (td,  $J$  = 7.4, 1.3 Hz, 1H), 4.27 (q,  $J$  = 7.1 Hz, 2H), 3.69 (ddd,  $J$  = 11.7, 7.6, 6.8 Hz, 1H), 3.57 (dt,  $J$  = 9.0, 7.6 Hz, 1H), 2.93 (dd,  $J$  = 13.7, 9.0 Hz, 1H), 2.65 – 2.54 (m, 1H), 2.49 (dd,  $J$  = 13.7, 7.7 Hz, 1H), 1.32 (t,  $J$  = 7.1 Hz, 3H);  $^{13}\text{C}$  NMR (DMSO- $d_6$ , 126 MHz)  $\delta$  173.8 (br), 171.8, 171.2, 158.5 (q,  $J_{\text{C-F}}$  = 36.1 Hz), 137.5 (br), 136.4, 135.9, 132.5 (br), 128.7, 128.4, 127.9, 127.1, 126.4,

125.7 (br), 122.6 (br), 115.8 (q,  $J_{C-F}$  = 291.8 Hz), 76.5, 68.0, 64.8, 61.7, 49.3, 48.5, 36.8, 35.4, 14.0; FTIR (NaCl, thin film) 3029, 2528, 1718, 1653, 1452, 1405, 1375, 1263, 1191, 1139, 971, 797, 749, 720  $\text{cm}^{-1}$ ; HRMS (MM) calc'd for  $[\text{M}-\text{C}_2\text{F}_3\text{O}_2]^+$  476.2068, found 476.2068.

**(2*R*,3*S*,5*R*,6*R*,7*aS*)-2,6-di-*tert*-butyl 7*a*-ethyl 3-phenyl-5-((*E*)-styryl)hexahydro-1*H*-pyrrolizine-2,6,7*a*-tricarboxylate (**S3**)**

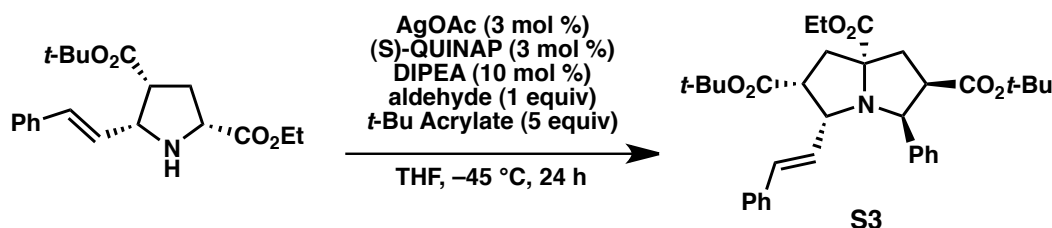

3 mol % catalyst solution in THF was pre-stirred for 30 minutes and then added to 52 mg of pyrrolidine **S2**. 15  $\mu\text{l}$  of benzaldehyde was added followed by 11  $\mu\text{l}$  of *t*-Bu Acrylate and 3  $\mu\text{l}$  of DIPEA. After 24 h the reaction mixture was concentrated and purified by silica gel column chromatography (5 $\rightarrow$ 20% ethyl acetate in hexanes) to afford **S3** in 14% yield. The enantiomeric excess was determined by chiral SFC analysis (OD, 2.5 mL/min, 7% IPA in  $\text{CO}_2$ ,  $\lambda$  = 254 nm):  $t_R$  (major) = 10.6 min,  $t_R$  (minor) = 11.5 min.  $[\alpha]_D^{25}$  =  $-66.858$  ( $c$  = 0.95,  $\text{CHCl}_3$ );  $^1\text{H}$  NMR (500 MHz,  $\text{CDCl}_3$ )  $\delta$  7.36 – 7.23 (m, 5H), 7.23 – 7.13 (m, 5H), 6.33 (dd,  $J$  = 15.7, 0.8 Hz, 1H), 6.07 (dd,  $J$  = 15.7, 7.1 Hz, 1H), 4.79 (d,  $J$  = 9.0 Hz, 1H), 4.25 (tdd,  $J$  = 10.7, 7.1, 3.6 Hz, 2H), 3.84 – 3.73 (m, 1H), 3.69 (t,  $J$  = 7.2 Hz, 1H), 3.11 (dd,  $J$  = 14.9, 8.0 Hz, 1H), 2.88 (dd,  $J$  = 13.4, 6.9 Hz, 1H), 2.51 (dd,  $J$  = 13.1, 6.8 Hz, 1H), 2.37 (t,  $J$  = 13.2 Hz, 1H), 2.20 (dd,  $J$  = 13.4, 8.1 Hz, 1H), 1.33 (dd,  $J$  = 23.0, 12.8 Hz, 1H), 1.26 (s, 9H), 0.98 (s, 9H);  $^{13}\text{C}$  NMR (126 MHz,  $\text{CDCl}_3$ )  $\delta$  176.81, 170.86, 170.59, 138.21, 137.26, 130.50, 129.44, 128.97, 128.32, 128.24, 127.95, 127.00, 126.37, 80.56, 80.38, 76.04, 67.07, 63.22, 61.05, 51.89, 50.88, 39.01, 37.18, 28.07, 27.98, 27.35, 14.35; FTIR (NaCl, thin film) 2977, 2930, 1728, 1599, 1494, 1477, 1458, 1367, 1247, 1152, 1096, 1029, 969, 848, 744  $\text{cm}^{-1}$ ; HRMS (MM) calc'd for  $[\text{M}+\text{H}]^+$  562.3169, found 562.3148.

(2*R*,3*R*,5*R*,6*R*,7*aR*)-2,6-di-*tert*-butyl 7*a*-methyl 3-(pentan-3-yl)-5-((*E*)-styryl)hexahydro-1*H*-pyrrolizine-2,6,7*a*-tricarboxylate (**S4**)

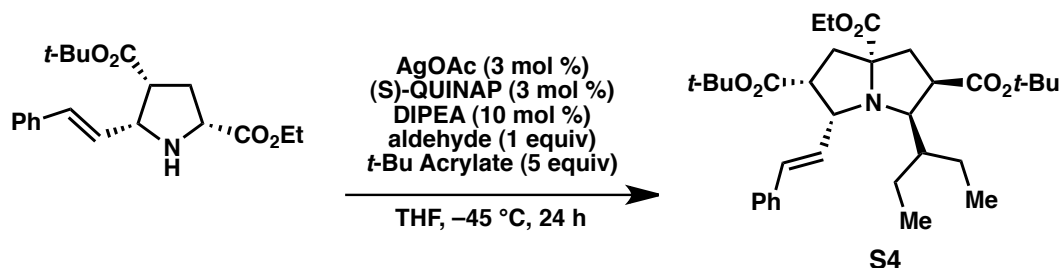

3 mol % catalyst solution in THF was pre-stirred for 30 minutes and then added to 52 mg of pyrrolidine **S2**. 18  $\mu$ l of 2-ethyl butyraldehyde was added followed by 11  $\mu$ l of *t*-Bu Acrylate and 3  $\mu$ l of DIPEA. After 24 h the reaction mixture was concentrated and purified by silica gel column chromatography (5 $\rightarrow$ 20% ethyl acetate in hexanes) to afford **S4** in 12% yield and 96% ee. The enantiomeric excess was determined by chiral SFC analysis (AD, 2.5 mL/min, 5% IPA in CO<sub>2</sub>,  $\lambda$  = 254 nm):  $t_R$  (minor) = 3.4 min,  $t_R$  (major) = 5.3 min.  $[\alpha]_D^{25} = -70.072$  ( $c$  = 0.89, CHCl<sub>3</sub>); <sup>1</sup>H NMR (500 MHz, CDCl<sub>3</sub>)  $\delta$  7.38 (s, 1H), 7.35 – 7.26 (m, 2H), 7.23 – 7.17 (m, 2H), 6.74 (d,  $J$  = 15.6 Hz, 1H), 6.16 (dd,  $J$  = 15.7, 6.7 Hz, 1H), 4.46 – 4.38 (m, 1H), 4.26 – 4.14 (m, 2H), 3.60 (ddd,  $J$  = 13.0, 8.8, 6.3 Hz, 1H), 3.35 (dd,  $J$  = 11.7, 6.7 Hz, 1H), 2.91 (ddd,  $J$  = 10.3, 6.8, 3.7 Hz, 1H), 2.74 (dd,  $J$  = 14.3, 10.2 Hz, 1H), 2.66 (t,  $J$  = 13.0 Hz, 1H), 2.09 (dd,  $J$  = 12.8, 6.2 Hz, 1H), 1.89 (dd,  $J$  = 14.3, 3.7 Hz, 1H), 1.54 (s, 9H), 1.38 (s, 9H), 1.32 (t,  $J$  = 7.1 Hz, 1H), 0.87 (t,  $J$  = 7.4 Hz, 3H), 0.76 (t,  $J$  = 7.4 Hz, 3H); <sup>13</sup>C NMR (126 MHz, CDCl<sub>3</sub>)  $\delta$  175.57, 174.77, 170.79, 137.62, 131.09, 130.48, 128.37, 126.91, 126.46, 80.95, 80.55, 75.83, 69.39, 60.89, 60.41, 48.34, 47.21, 41.04, 38.19, 35.98, 28.15, 28.15, 21.78, 20.75, 14.31, 10.48, 7.55; FTIR (NaCl, thin film) 2974, 1718, 1559, 1457, 1366, 1247, 1146, 847 cm<sup>-1</sup>; HRMS (MM) calc'd for [M+H]<sup>+</sup> 556.3638, found 556.3625.

### 7. Endo stereochemical assignment for pyrrolizidines in Table 3.

The relative stereochemistry of the pyrrolizidines in Table 3 was assigned using a combination of <sup>1</sup>H NOESY and <sup>1</sup>H NMR coupling constant data. The relative stereochemistry of compound **12** was confirmed by single crystal X-ray diffraction. For pyrrolizidine **12**, the H<sub>A</sub>-H<sub>B</sub>  $J$ -value of 7.6 Hz is diagnostic of the *cis*-relationship between the styrene substituent and the *t*-butyl ester. The related compounds **18a** and **S5** show similar  $J$  values, between 7.5 and 7.8 Hz, for H<sub>A</sub> and H<sub>B</sub>. Alternatively, the  $J$ -values for *trans*-disposed protons, for example H<sub>B</sub> and H<sub>C</sub> (see compound 19a), were found to be ~11–12 Hz. Based on this coupling constant analysis, and the NOESY data, the relative stereochemistry was assigned as that resulting from an *endo*-selective (1,3)-



DCA for compounds **19a–19f**. The key *J*-values and observed NOESY data are tabulated below. The NOESY spectra are included with the rest of the NMR characterization data in the Supporting Information Part II.

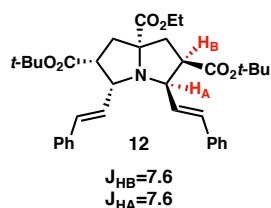

(confirmed by X-ray diffraction)

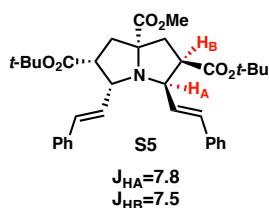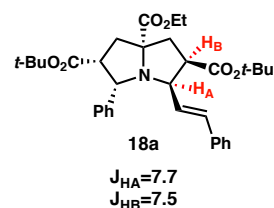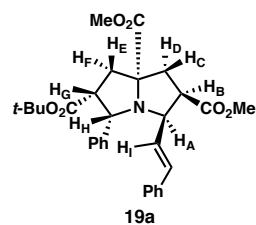

| J (Hz) |      |
|--------|------|
| $H_A$  | 7.8  |
| $H_B$  | 7.8  |
| $H_B$  | 11.8 |
| $H_C$  | 11.8 |
| $H_B$  | 6.6  |
| $H_D$  | 6.6  |

| NOEs      |              |
|-----------|--------------|
| $H_A H_B$ | $H_B H_D$    |
| $H_C H_E$ | $H_I H_H$    |
| $H_E H_G$ | $H_I H_C$    |
| $H_G H_H$ | no $H_I H_B$ |

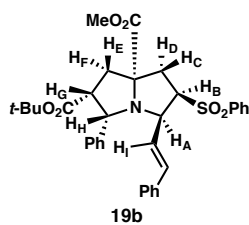

| J (Hz) |      |
|--------|------|
| $H_A$  | 7.0  |
| $H_B$  | 6.6  |
| $H_B$  | 12.1 |
| $H_C$  | 12.0 |
| $H_B$  | 6.6  |
| $H_D$  | 6.4  |

| NOEs      |              |
|-----------|--------------|
| $H_A H_B$ | $H_B H_D$    |
| $H_C H_E$ | $H_I H_H$    |
| $H_E H_G$ | $H_I H_C$    |
| $H_G H_H$ | no $H_I H_B$ |

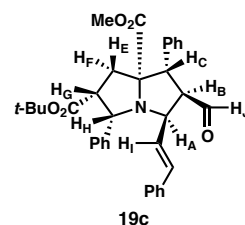

| J (Hz) |      |
|--------|------|
| $H_A$  | 8.1  |
| $H_B$  | 8.1  |
| $H_B$  | 12.0 |
| $H_C$  | 12.0 |
| $H_B$  | 1.8  |
| $H_D$  | 1.8  |

| NOEs      |              |
|-----------|--------------|
| $H_A H_B$ | $H_I H_H$    |
| $H_C H_E$ | $H_I H_C$    |
| $H_E H_G$ | no $H_I H_B$ |
| $H_G H_H$ |              |

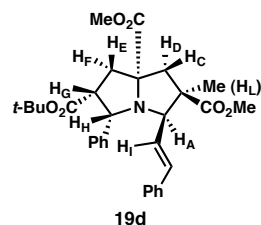

| NOEs      |           |
|-----------|-----------|
| $H_A H_L$ | $H_G H_H$ |
| $H_D H_L$ | $H_I H_H$ |
| $H_E H_C$ |           |
| $H_E H_G$ |           |

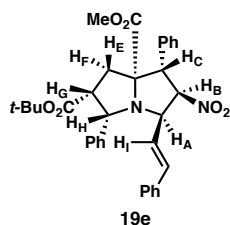

| J (Hz) |      |
|--------|------|
| $H_A$  | 8.0  |
| $H_B$  | 8.0  |
| $H_B$  | 11.1 |
| $H_C$  | 11.1 |

| NOEs      |           |
|-----------|-----------|
| $H_A H_B$ | $H_I H_H$ |
| $H_C H_E$ | $H_I H_C$ |
| $H_E H_G$ | $H_H H_C$ |
| $H_G H_H$ | $H_H H_E$ |

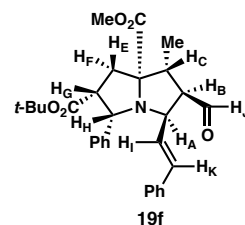

| J (Hz) |      |
|--------|------|
| $H_A$  | 8.2  |
| $H_B$  | 8.2  |
| $H_B$  | 11.7 |
| $H_C$  | 11.8 |
| $H_B$  | 1.6  |
| $H_J$  | 1.6  |

| NOEs      |              |
|-----------|--------------|
| $H_A H_B$ | $H_I H_H$    |
| $H_C H_E$ | $H_K H_C$    |
| $H_E H_G$ | $H_I H_C$    |
| $H_G H_H$ | no $H_I H_B$ |

## 8. SFC/HPLC traces of racemic and enantioenriched products.

Methyl carbamate **S1**: racemic

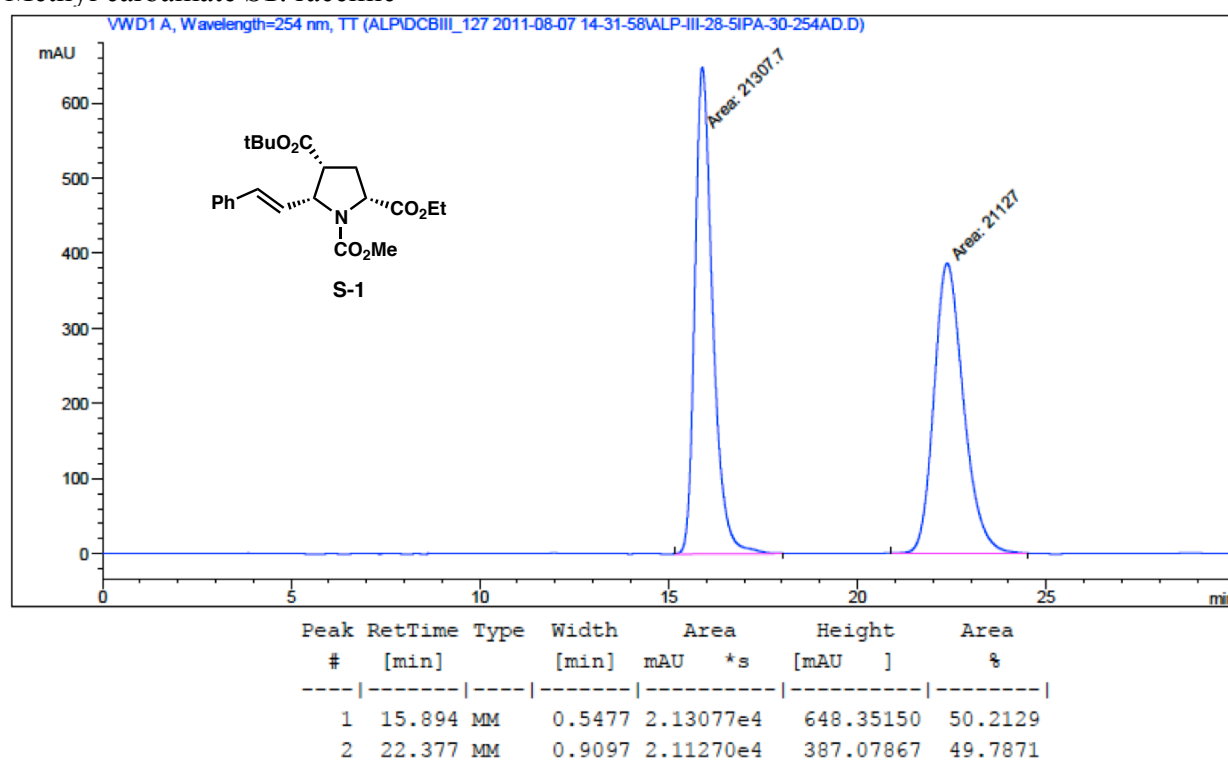

Table S1, entry 1: enantioenriched, 96% ee

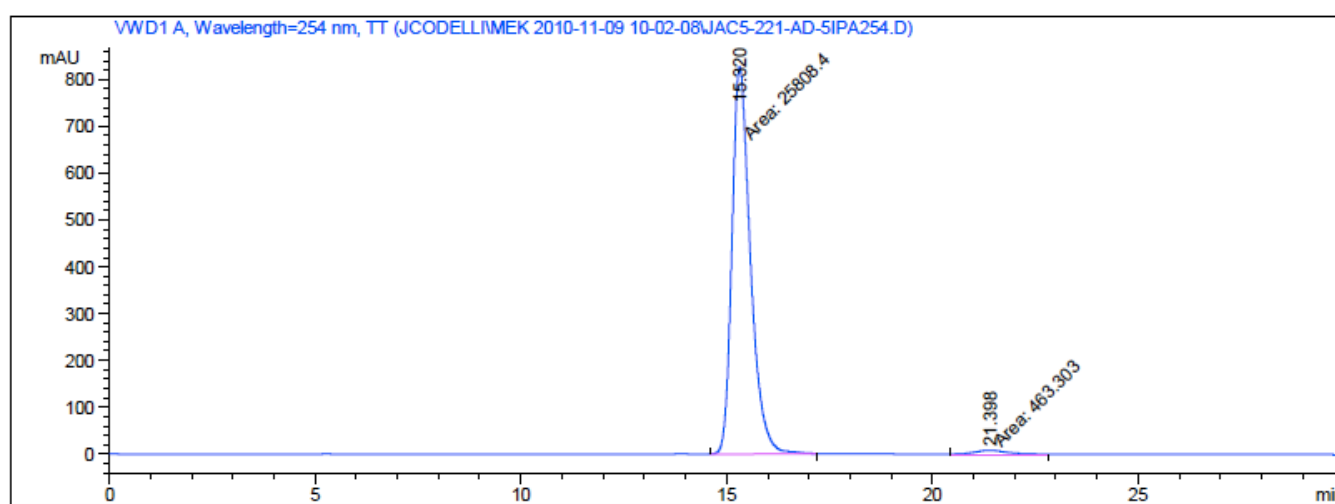

| Peak # | RetTime [min] | Type | Width [min] | Area mAU *s | Height [mAU] | Area %  |
|--------|---------------|------|-------------|-------------|--------------|---------|
| 1      | 15.320        | MM   | 0.5202      | 2.58084e4   | 826.91376    | 98.2365 |
| 2      | 21.398        | MM   | 0.9279      | 463.30341   | 8.32209      | 1.7635  |

**Table S1, entry 2:** enantioenriched, 63% ee

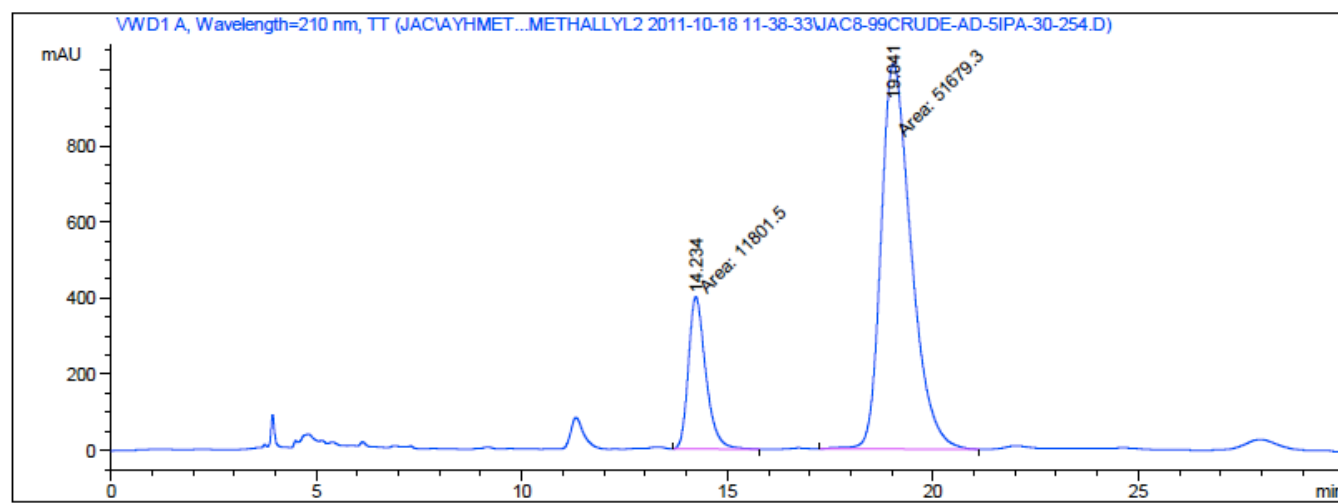

| Peak # | RetTime [min] | Type | Width [min] | Area mAU *s | Height [mAU] | Area %  |
|--------|---------------|------|-------------|-------------|--------------|---------|
| 1      | 14.234        | MM   | 0.4913      | 1.18015e4   | 400.33957    | 18.5907 |
| 2      | 19.041        | MM   | 0.8507      | 5.16792e4   | 1012.46924   | 81.4093 |

**Table S1, entry 3:** enantioenriched, 46% ee

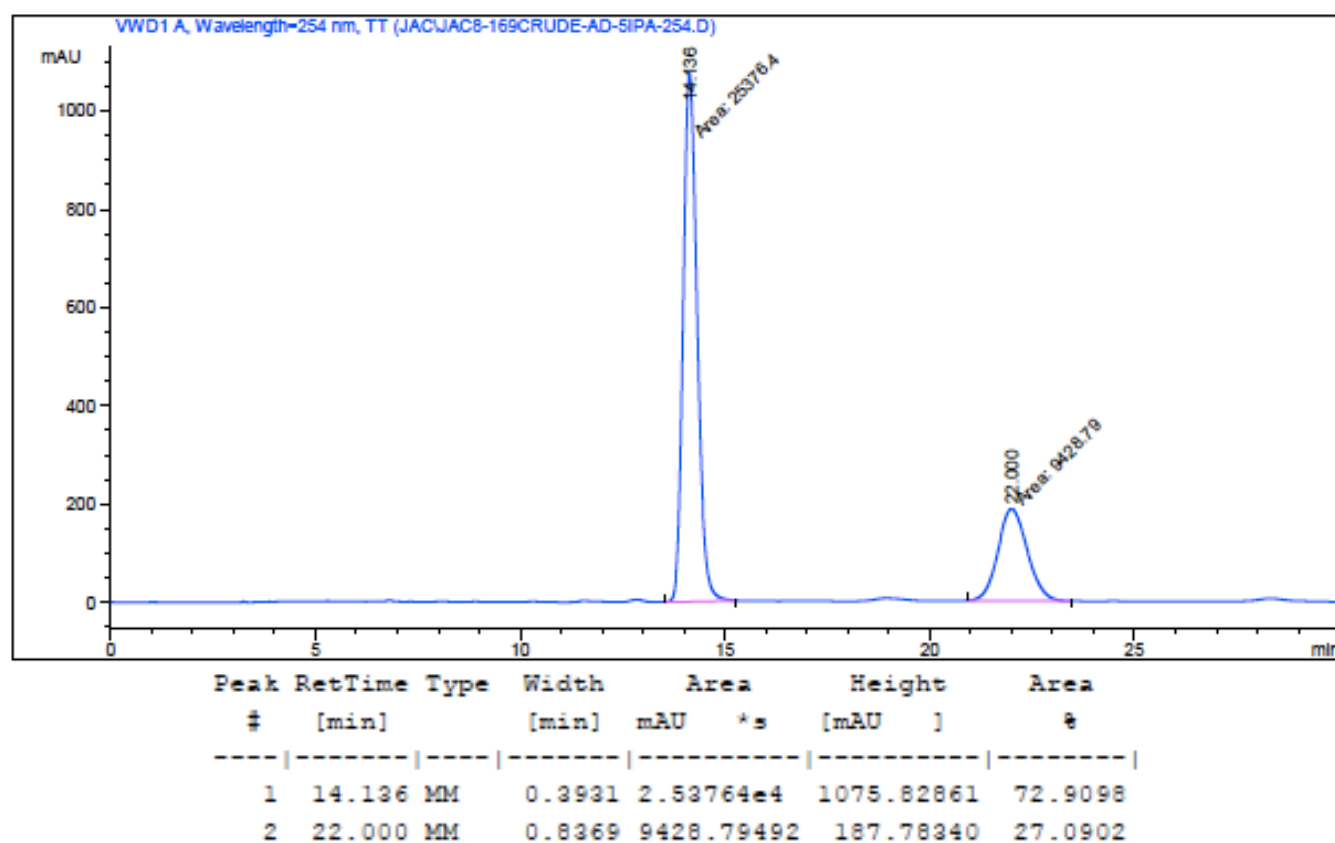

**Table S1, entry 4:** enantioenriched, 90% ee

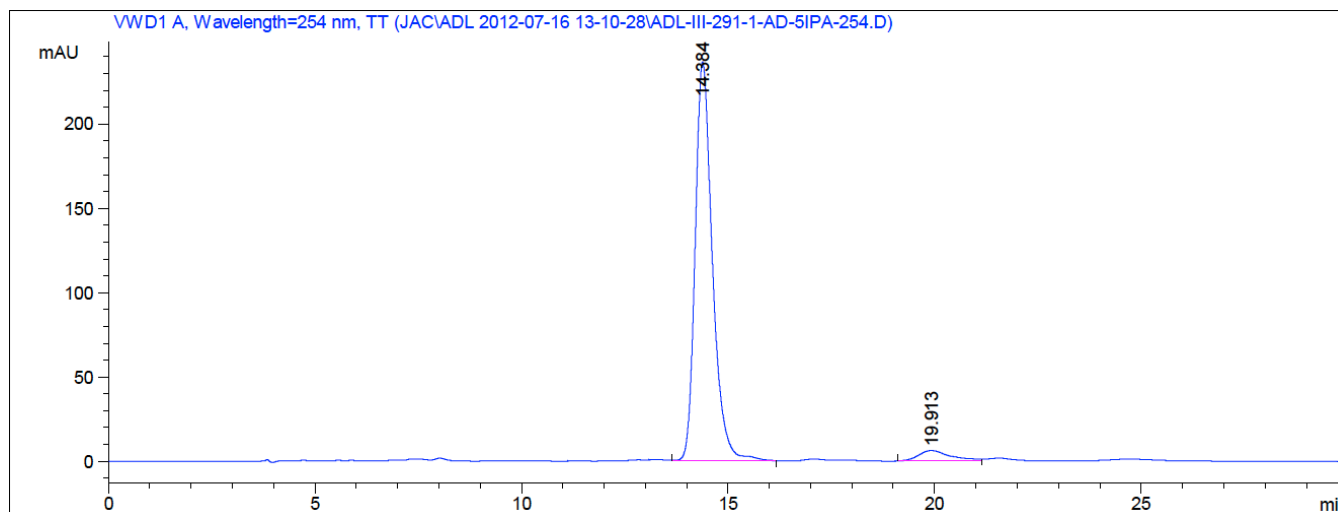

| Peak # | RetTime [min] | Type | Width [min] | Area mAU *s | Height [mAU] | Area %  |
|--------|---------------|------|-------------|-------------|--------------|---------|
| 1      | 14.384        | VB   | 0.4361      | 6863.74121  | 236.53506    | 95.3206 |
| 2      | 19.913        | BV   | 0.6398      | 336.95078   | 6.23651      | 4.6794  |

**Table S1, entry 5:** enantioenriched, 78% ee

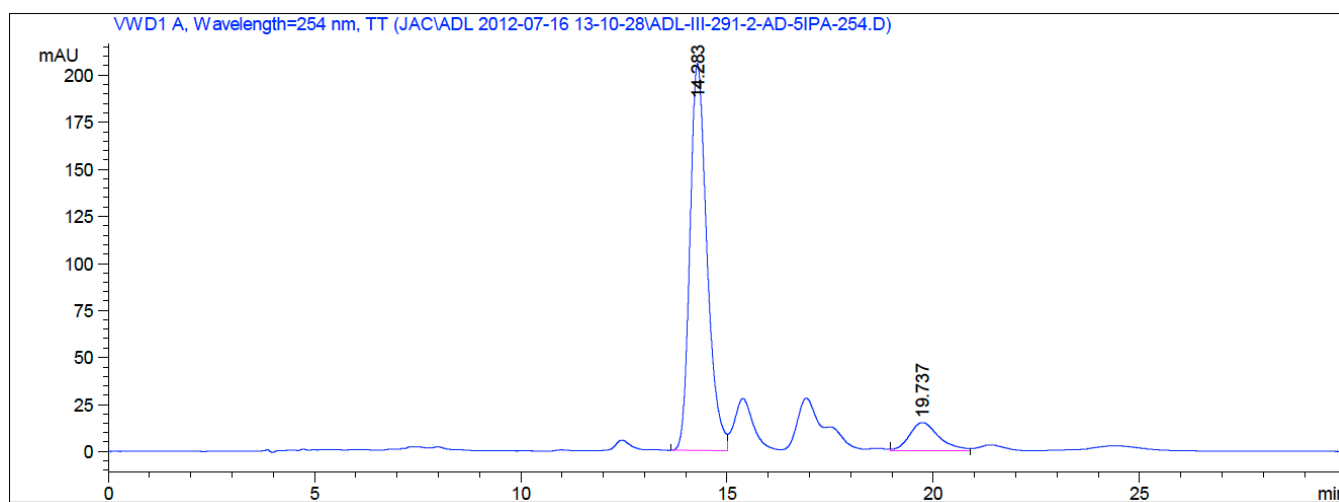

| Peak # | RetTime [min] | Type | Width [min] | Area mAU *s | Height [mAU] | Area %  |
|--------|---------------|------|-------------|-------------|--------------|---------|
| 1      | 14.283        | BV   | 0.4353      | 5902.47510  | 205.65765    | 88.6961 |
| 2      | 19.737        | VV   | 0.6069      | 752.24481   | 14.98246     | 11.3039 |

**Table S1, entry 7:** enantioenriched, 90% ee

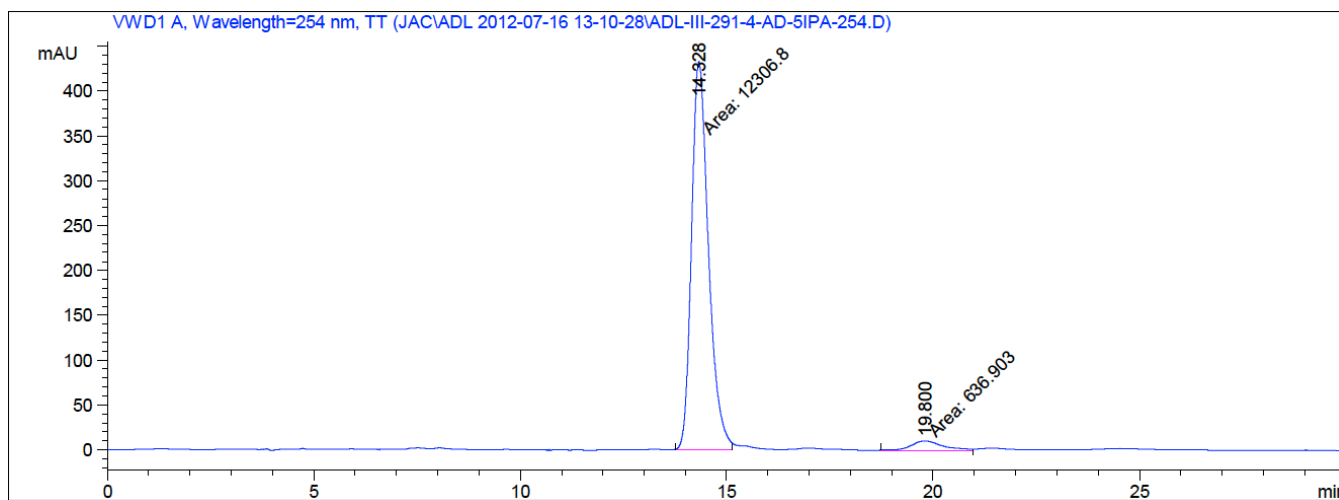

| Peak # | RetTime [min] | Type | Width [min] | Area mAU *s | Height [mAU] | Area %  |
|--------|---------------|------|-------------|-------------|--------------|---------|
| 1      | 14.328        | MM   | 0.4745      | 1.23068e4   | 432.23904    | 95.0795 |
| 2      | 19.800        | MM   | 0.9596      | 636.90289   | 11.06230     | 4.9205  |

**Table S1, entry 8:** enantioenriched, 90% ee

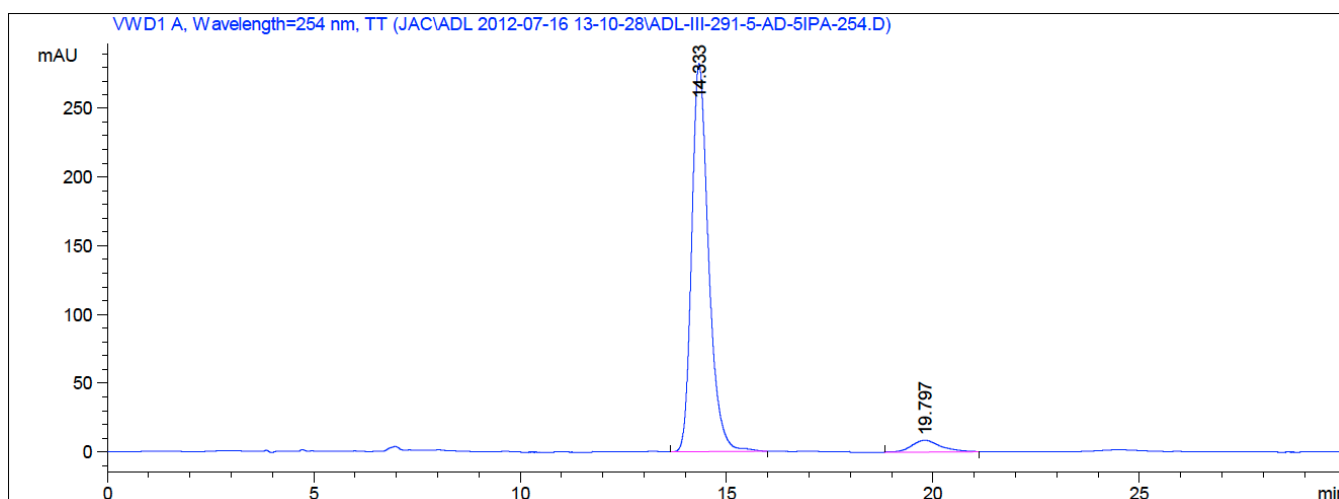

| Peak # | RetTime [min] | Type | Width [min] | Area mAU *s | Height [mAU] | Area %  |
|--------|---------------|------|-------------|-------------|--------------|---------|
| 1      | 14.333        | VB   | 0.4292      | 8036.22461  | 282.65863    | 95.1434 |
| 2      | 19.797        | BB   | 0.5753      | 410.20886   | 8.45801      | 4.8566  |

**Table S1, entry 9:** enantioenriched, 91% ee

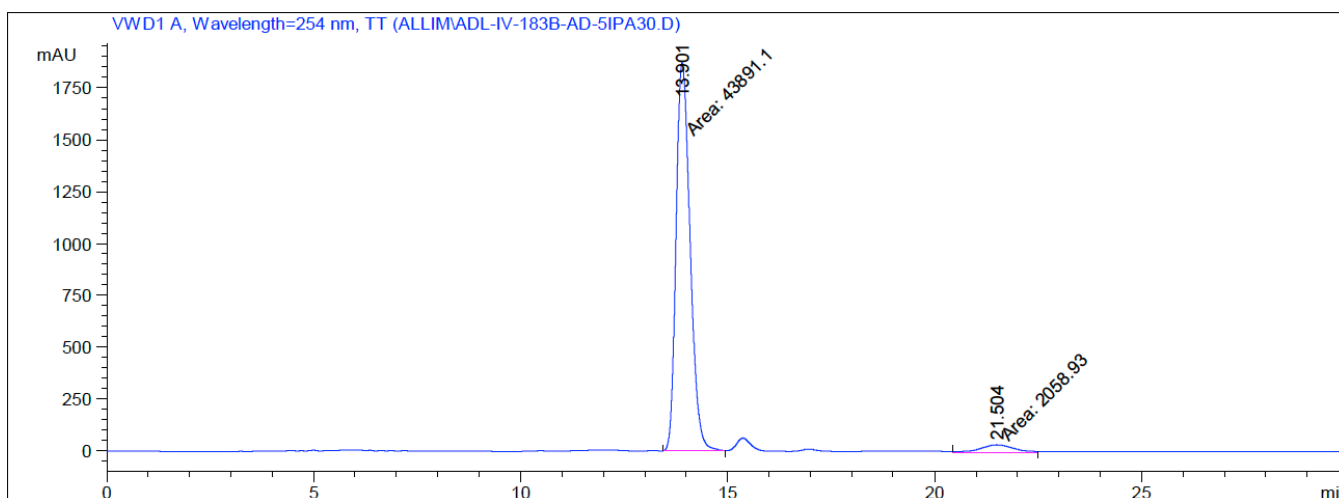

| Peak # | RetTime [min] | Type | Width [min] | Area mAU *s | Height [mAU] | Area %  |
|--------|---------------|------|-------------|-------------|--------------|---------|
| 1      | 13.901        | MM   | 0.3918      | 4.38911e4   | 1867.15771   | 95.5192 |
| 2      | 21.504        | MM   | 0.9339      | 2058.93115  | 36.74272     | 4.4808  |

**Pyrrolizidine 12: racemic**

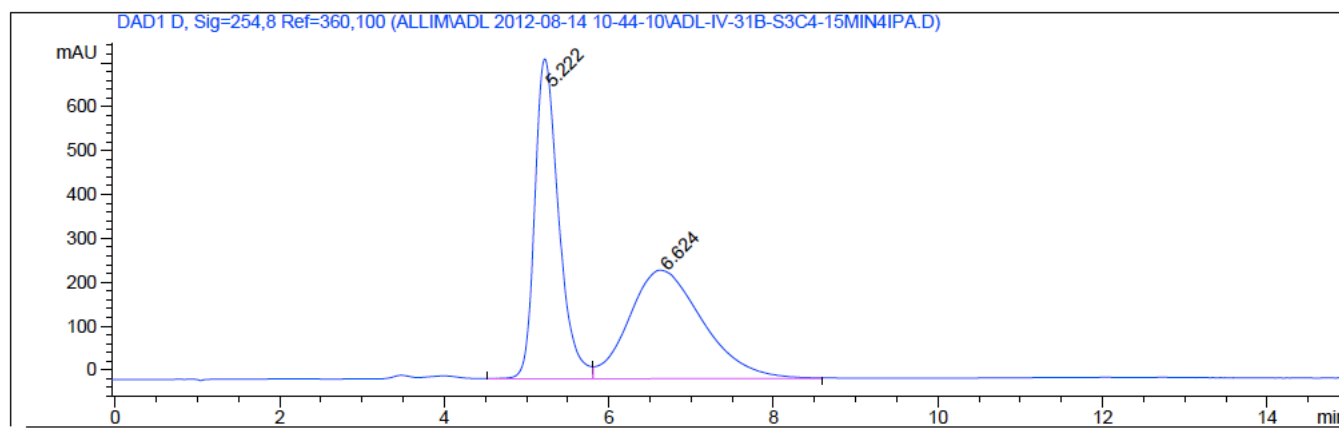

| Peak # | RetTime [min] | Type | Width [min] | Area [mAU*s] | Height [mAU] | Area %  |
|--------|---------------|------|-------------|--------------|--------------|---------|
| 1      | 5.222         | VV   | 0.3078      | 1.47293e4    | 728.71198    | 48.9407 |
| 2      | 6.624         | VB   | 0.9374      | 1.53668e4    | 247.16225    | 51.0593 |

**Pyrrolizidine 12: enantioenriched, 90% ee**

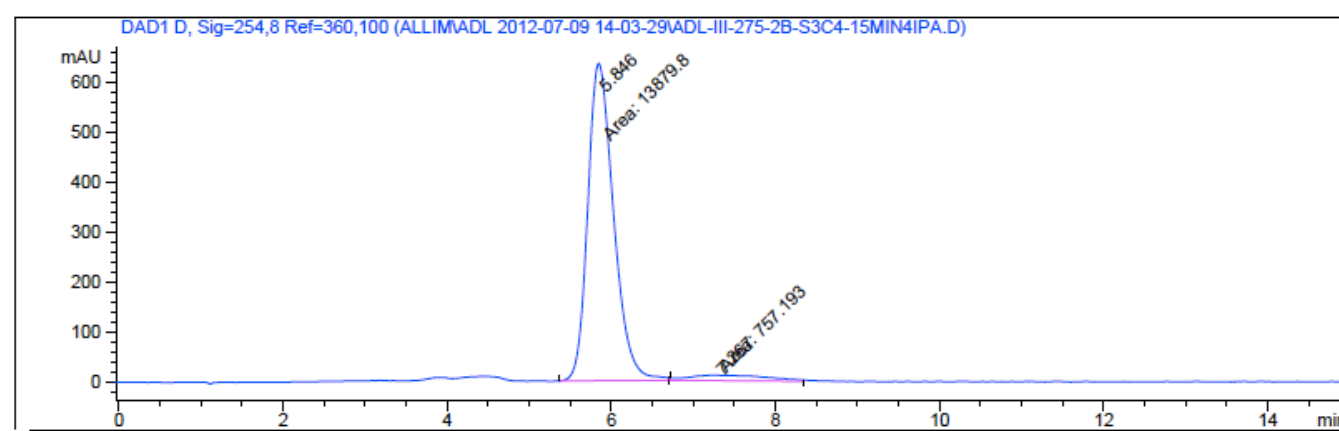

| Peak # | RetTime [min] | Type | Width [min] | Area [mAU*s] | Height [mAU] | Area %  |
|--------|---------------|------|-------------|--------------|--------------|---------|
| 1      | 5.846         | MM   | 0.3649      | 1.38798e4    | 633.94122    | 94.8269 |
| 2      | 7.267         | MM   | 1.1258      | 757.19305    | 11.20974     | 5.1731  |

**18a (Table 2, entry 1): racemic**

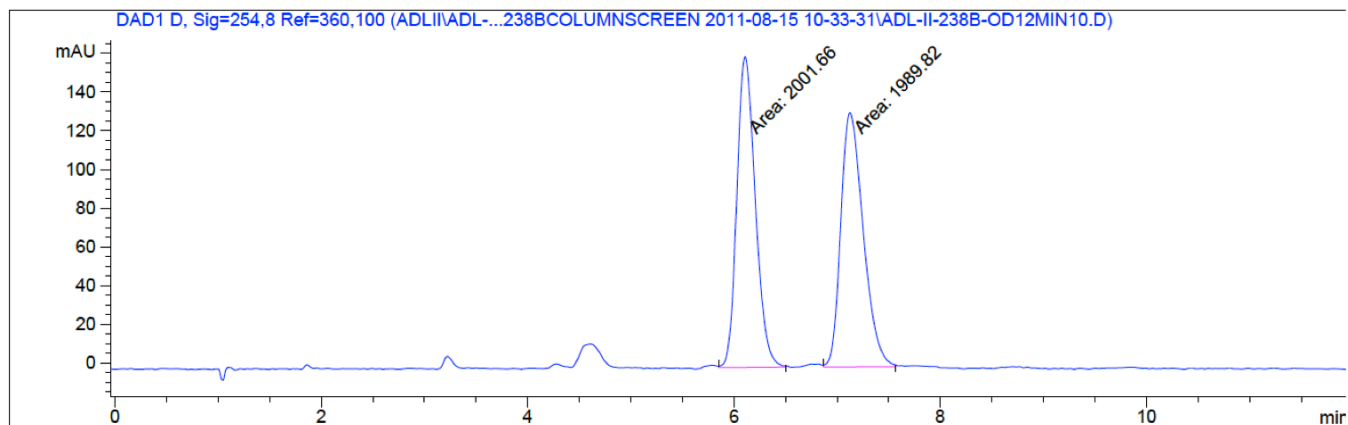

| Peak # | RetTime [min] | Type | Width [min] | Area [mAU*s] | Height [mAU] | Area %  |
|--------|---------------|------|-------------|--------------|--------------|---------|
| 1      | 6.108         | MM   | 0.2078      | 2001.65894   | 160.51328    | 50.1483 |
| 2      | 7.126         | MM   | 0.2525      | 1989.82288   | 131.33904    | 49.8517 |

**18a (Table 2, entry 1):** enantioenriched, 91% ee

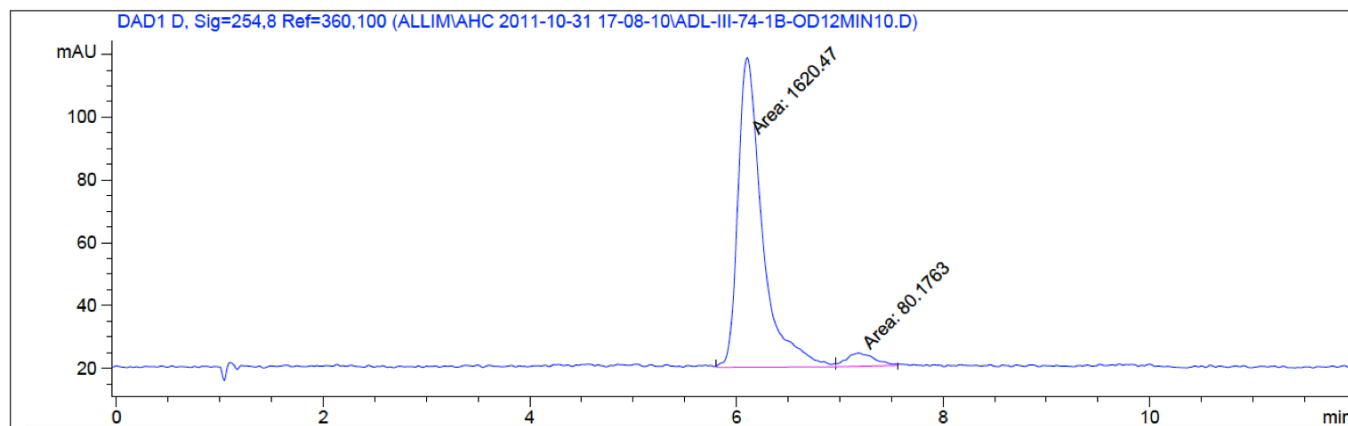



| Peak # | RetTime [min] | Type | Width [min] | Area [mAU*s] | Height [mAU] | Area %  |
|--------|---------------|------|-------------|--------------|--------------|---------|
| 1      | 6.105         | MM   | 0.2734      | 1620.47278   | 98.79230     | 95.2855 |
| 2      | 7.181         | MM   | 0.3144      | 80.17634     | 4.25047      | 4.7145  |

**18b (Table 2, entry 2): racemic**

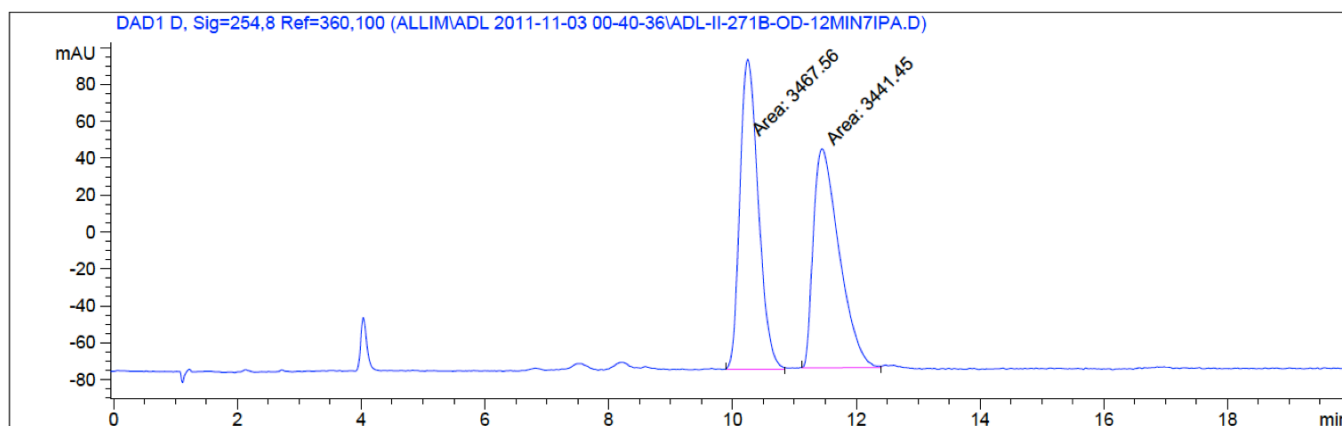

| Peak # | RetTime [min] | Type | Width [min] | Area [mAU*s] | Height [mAU] | Area %  |
|--------|---------------|------|-------------|--------------|--------------|---------|
| 1      | 10.248        | MM   | 0.3441      | 3467.56030   | 167.93707    | 50.1890 |
| 2      | 11.449        | MM   | 0.4829      | 3441.44751   | 118.78632    | 49.8110 |

**18b (Table 2, entry 2): enantioenriched, 91% ee**

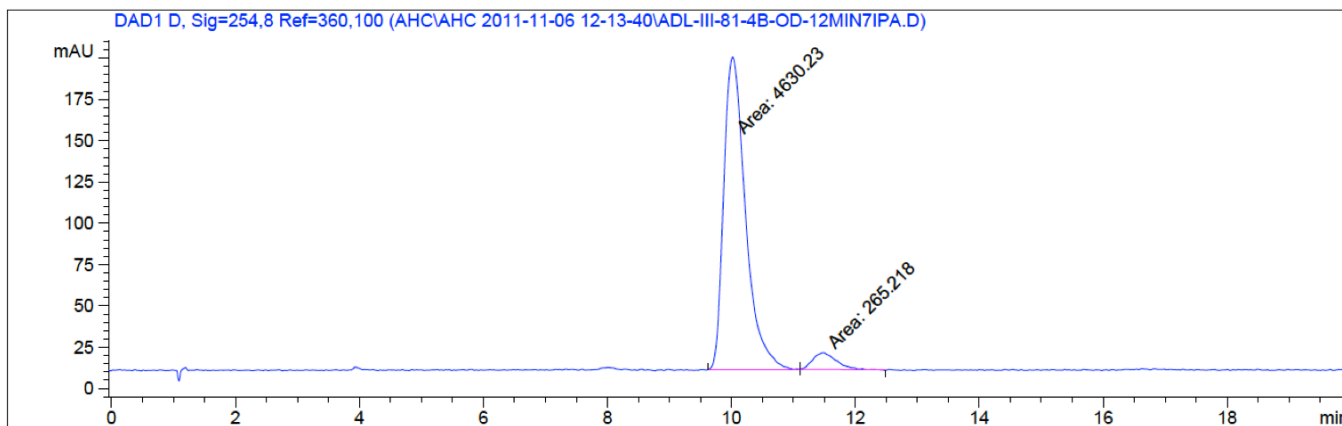

| Peak # | RetTime [min] | Type | Width [min] | Area [mAU*s] | Height [mAU] | Area %  |
|--------|---------------|------|-------------|--------------|--------------|---------|
| 1      | 10.021        | MM   | 0.4076      | 4630.22852   | 189.33492    | 94.5824 |
| 2      | 11.489        | MM   | 0.4401      | 265.21768    | 10.04365     | 5.4176  |

**18c (Table 2, entry 3): racemic**

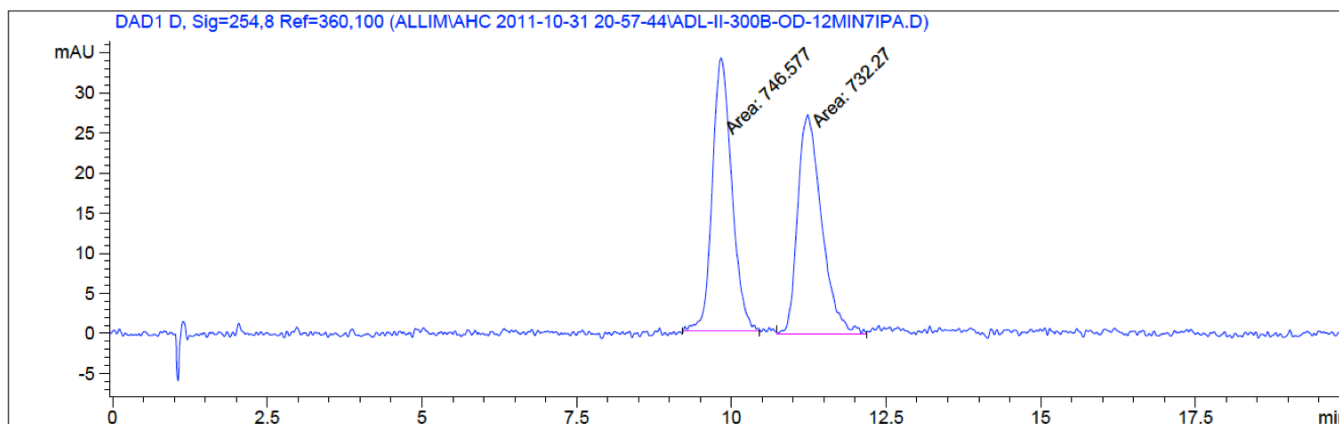

| Peak # | RetTime [min] | Type | Width [min] | Area [mAU*s] | Height [mAU] | Area %  |
|--------|---------------|------|-------------|--------------|--------------|---------|
| 1      | 9.834         | MM   | 0.3654      | 746.57739    | 34.05050     | 50.4837 |
| 2      | 11.236        | MM   | 0.4474      | 732.26959    | 27.27870     | 49.5163 |

**18c (Table 2, entry 3): enantioenriched, 88% ee**

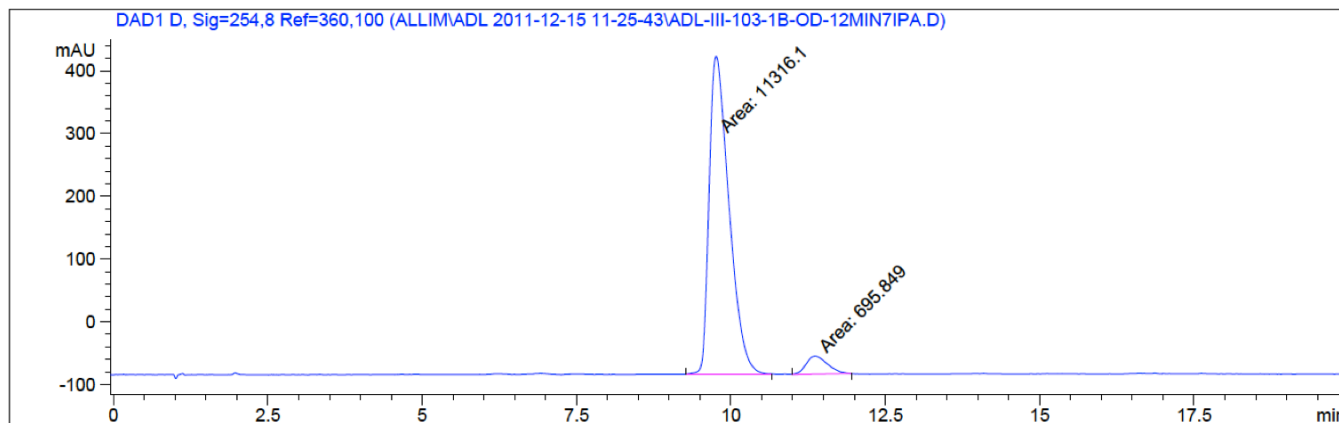

| Peak # | RetTime [min] | Type | Width [min] | Area [mAU*s] | Height [mAU] | Area %  |
|--------|---------------|------|-------------|--------------|--------------|---------|
| 1      | 9.762         | MM   | 0.3720      | 1.13161e4    | 507.00854    | 94.2070 |
| 2      | 11.367        | MM   | 0.4038      | 695.84937    | 28.72410     | 5.7930  |

**18d (Table 2, entry 4): racemic**

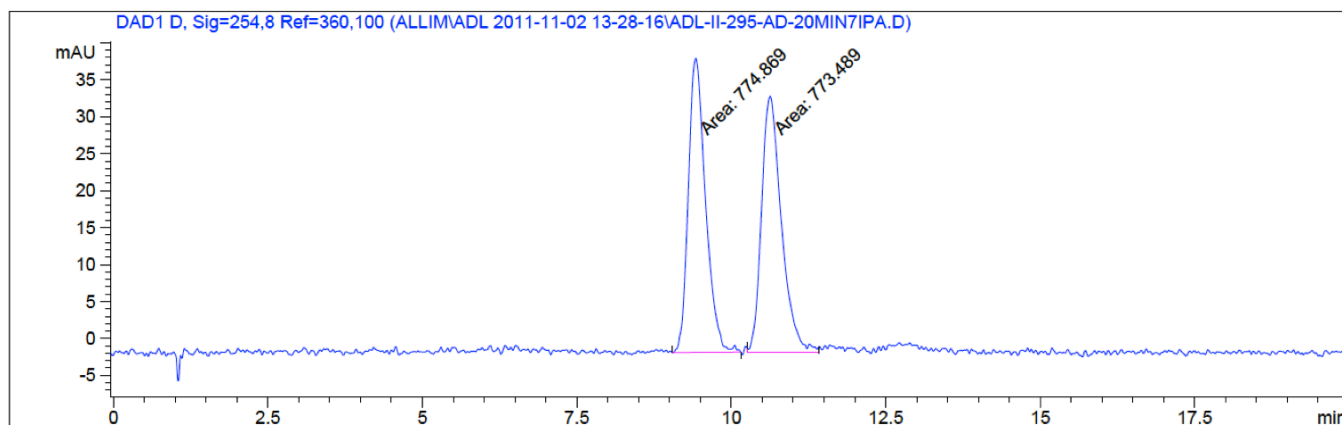

| Peak # | RetTime [min] | Type | Width [min] | Area [mAU*s] | Height [mAU] | Area %  |
|--------|---------------|------|-------------|--------------|--------------|---------|
| 1      | 9.424         | MM   | 0.3245      | 774.86896    | 39.79745     | 50.0446 |
| 2      | 10.628        | MM   | 0.3721      | 773.48914    | 34.64676     | 49.9554 |

**18d (Table 2, entry 4):** enantioenriched, 92% ee

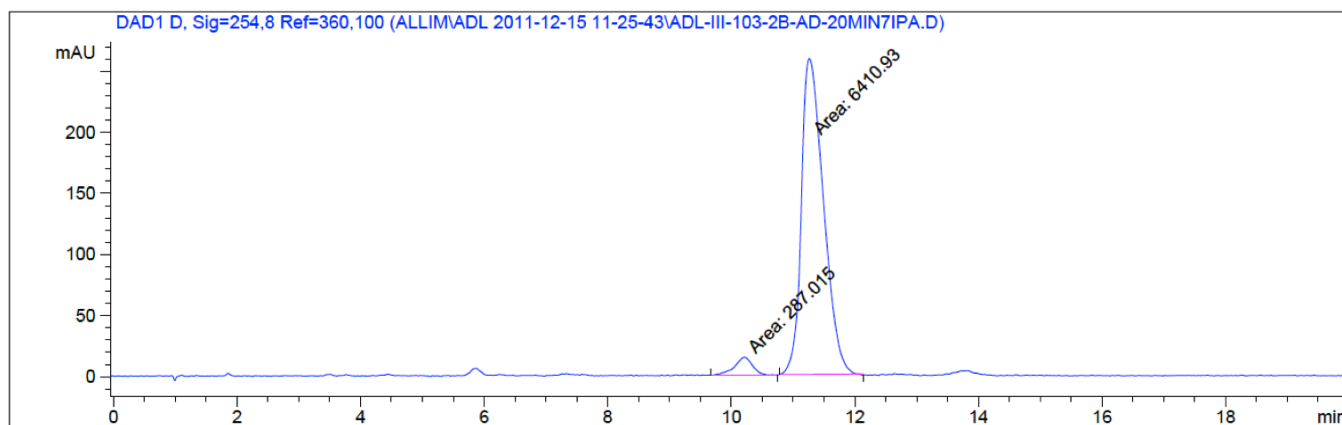

| Peak # | RetTime [min] | Type | Width [min] | Area [mAU*s] | Height [mAU] | Area %  |
|--------|---------------|------|-------------|--------------|--------------|---------|
| 1      | 10.212        | MM   | 0.3282      | 287.01508    | 14.57303     | 4.2851  |
| 2      | 11.264        | MM   | 0.4134      | 6410.92969   | 258.47113    | 95.7149 |

**18e (Table 2, entry 5):** racemic

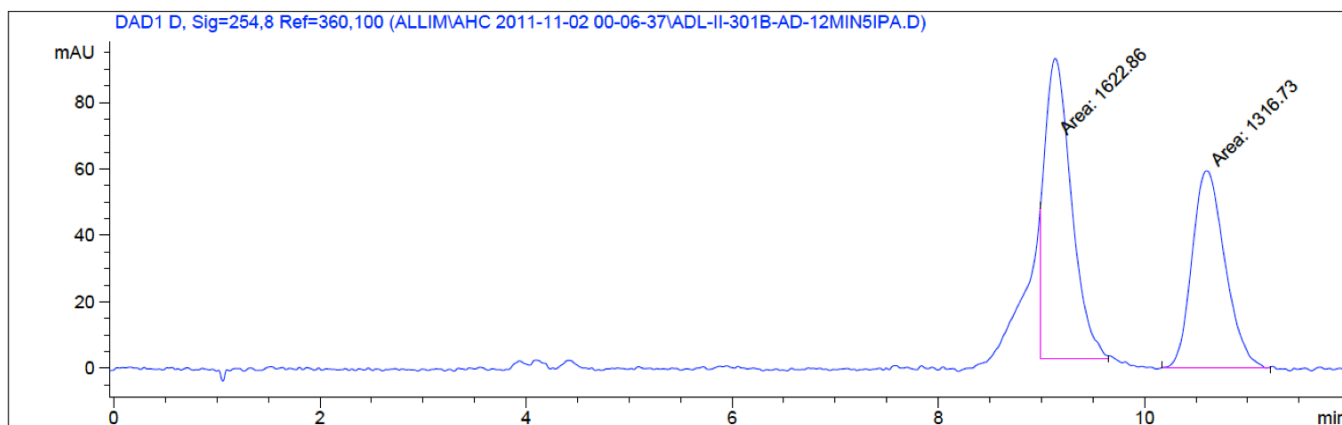

| Peak # | RetTime [min] | Type | Width [min] | Area [mAU*s] | Height [mAU] | Area %  |
|--------|---------------|------|-------------|--------------|--------------|---------|
| 1      | 9.136         | MM   | 0.2995      | 1622.86243   | 90.31247     | 55.2070 |
| 2      | 10.604        | MM   | 0.3699      | 1316.73352   | 59.32040     | 44.7930 |

**18e (Table 2, entry 5):** enantioenriched, 88% ee

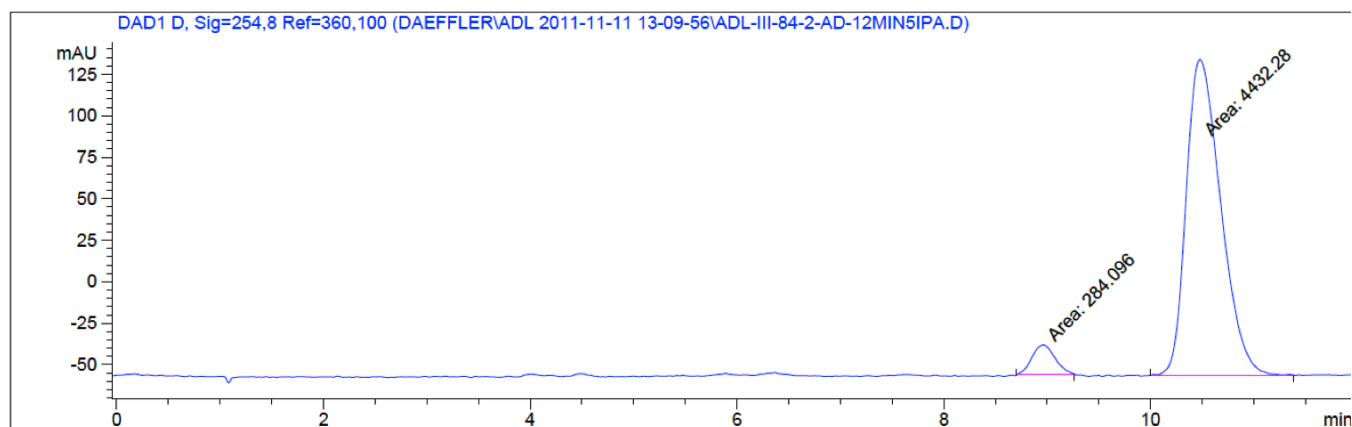

| Peak # | RetTime [min] | Type | Width [min] | Area [mAU*s] | Height [mAU] | Area %  |
|--------|---------------|------|-------------|--------------|--------------|---------|
| 1      | 8.965         | MM   | 0.2622      | 284.09586    | 18.05857     | 6.0236  |
| 2      | 10.478        | MM   | 0.3875      | 4432.28174   | 190.62163    | 93.9764 |

**18f (Table 2, entry 6):** racemic

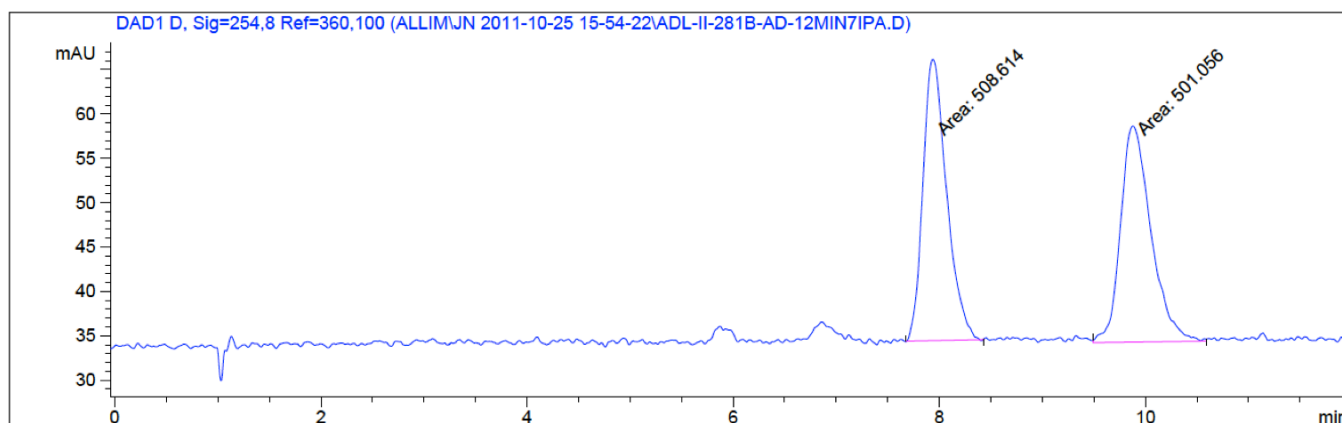

| Peak # | RetTime [min] | Type | Width [min] | Area [mAU*s] | Height [mAU] | Area %  |
|--------|---------------|------|-------------|--------------|--------------|---------|
| 1      | 7.939         | MM   | 0.2672      | 508.61426    | 31.72702     | 50.3743 |
| 2      | 9.879         | MM   | 0.3428      | 501.05600    | 24.35941     | 49.6257 |

**18f (Table 2, entry 6):** enantioenriched, 93% ee

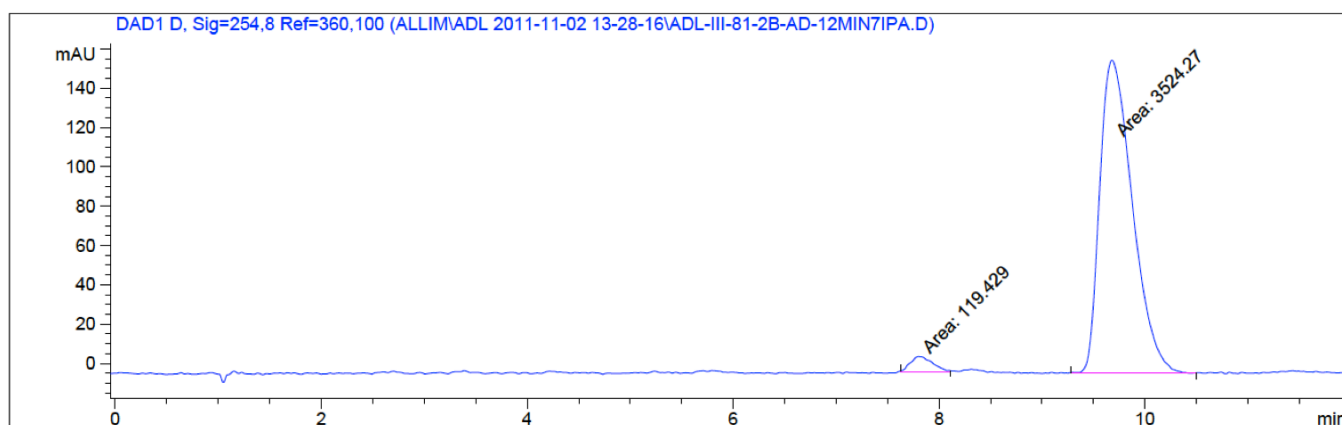

| Peak # | RetTime [min] | Type | Width [min] | Area [mAU*s] | Height [mAU] | Area %  |
|--------|---------------|------|-------------|--------------|--------------|---------|
| 1      | 7.801         | MM   | 0.2545      | 119.42921    | 7.82248      | 3.2777  |
| 2      | 9.680         | MM   | 0.3688      | 3524.26855   | 159.27747    | 96.7223 |

**18g (Table 2, entry 7):** racemic

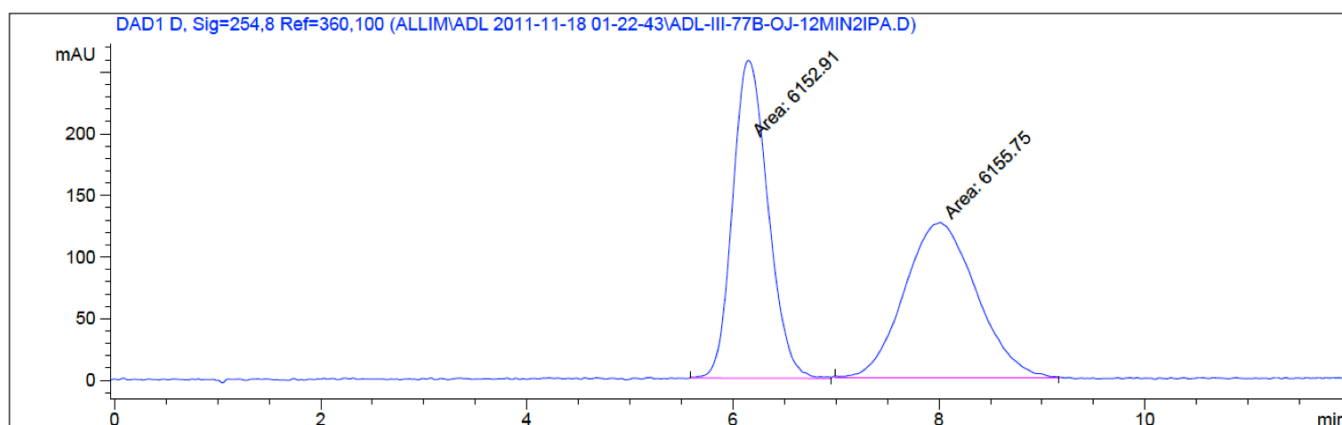

| Peak # | RetTime [min] | Type | Width [min] | Area [mAU*s] | Height [mAU] | Area %  |
|--------|---------------|------|-------------|--------------|--------------|---------|
| 1      | 6.153         | MM   | 0.3977      | 6152.91113   | 257.88422    | 49.9885 |
| 2      | 8.012         | MM   | 0.8130      | 6155.75195   | 126.18888    | 50.0115 |

**18g (Table 2, entry 7):** enantioenriched, 95% ee

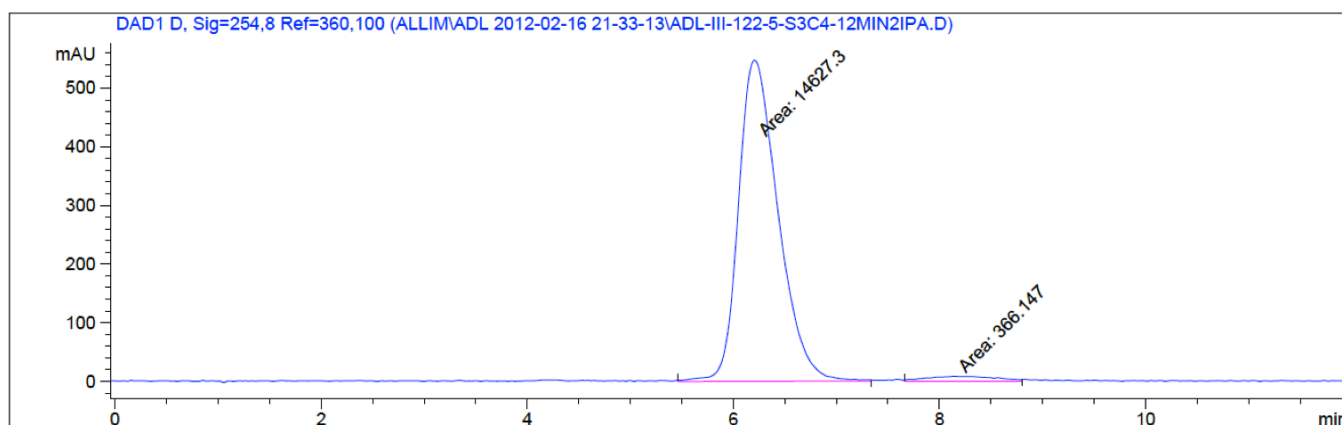

| Peak # | RetTime [min] | Type | Width [min] | Area [mAU*s] | Height [mAU] | Area %  |
|--------|---------------|------|-------------|--------------|--------------|---------|
| 1      | 6.205         | MM   | 0.4450      | 1.46273e4    | 547.89642    | 97.5580 |
| 2      | 8.144         | MM   | 0.7646      | 366.14673    | 7.98159      | 2.4420  |

**18h (Table 2, entry 8):** racemic

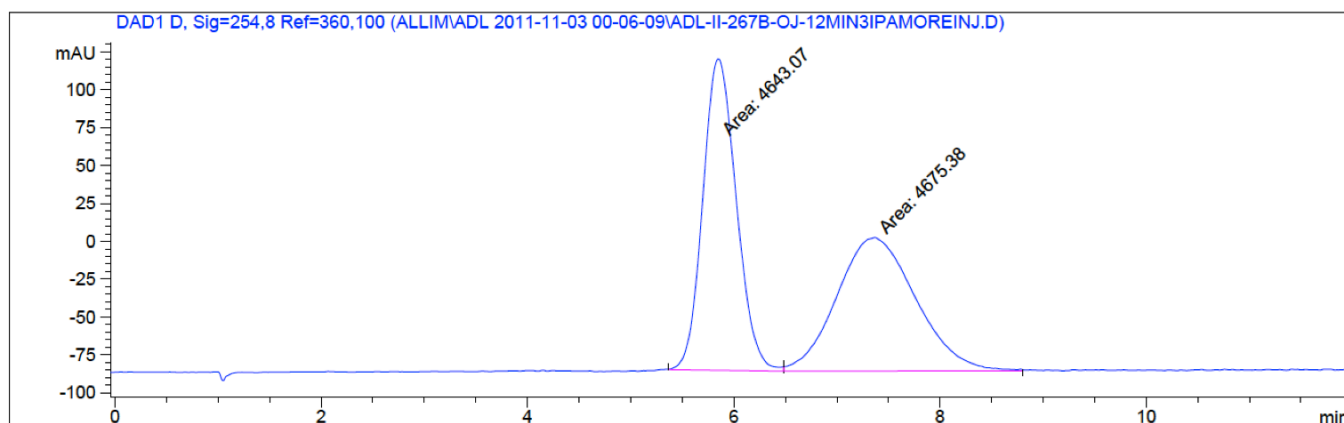

| Peak # | RetTime [min] | Type | Width [min] | Area [mAU*s] | Height [mAU] | Area %  |
|--------|---------------|------|-------------|--------------|--------------|---------|
| 1      | 5.851         | MM   | 0.3763      | 4643.07080   | 205.62646    | 49.8266 |
| 2      | 7.368         | MM   | 0.8845      | 4675.37891   | 88.09424     | 50.1734 |

**18h (Table 2, entry 8):** enantioenriched, 92% ee

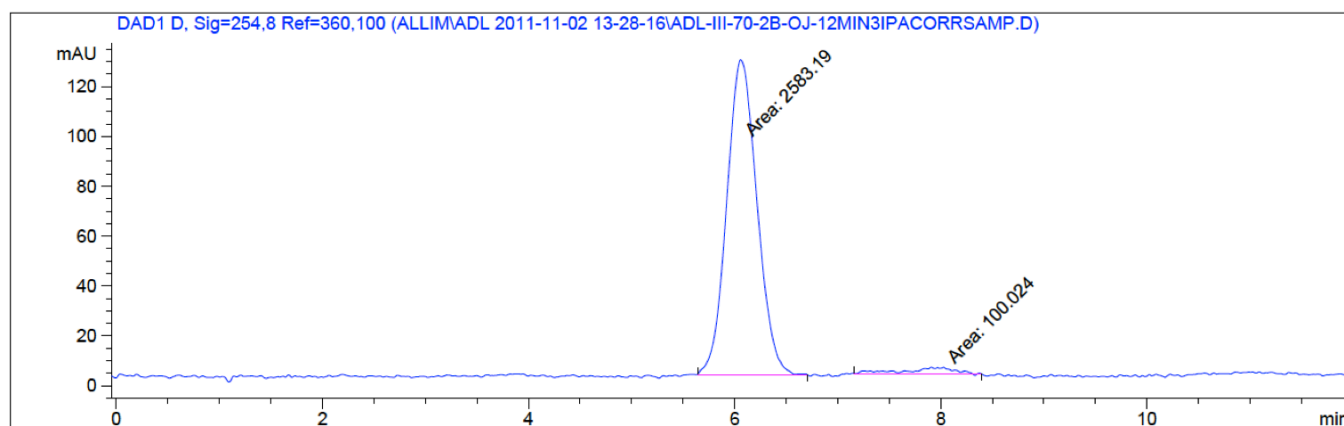

| Peak # | RetTime [min] | Type | Width [min] | Area [mAU*s] | Height [mAU] | Area %  |
|--------|---------------|------|-------------|--------------|--------------|---------|
| 1      | 6.060         | MM   | 0.3404      | 2583.18530   | 126.47279    | 96.2722 |
| 2      | 8.025         | MM   | 0.5850      | 100.02399    | 2.84972      | 3.7278  |

**18i (Table 2, entry 9):** racemic

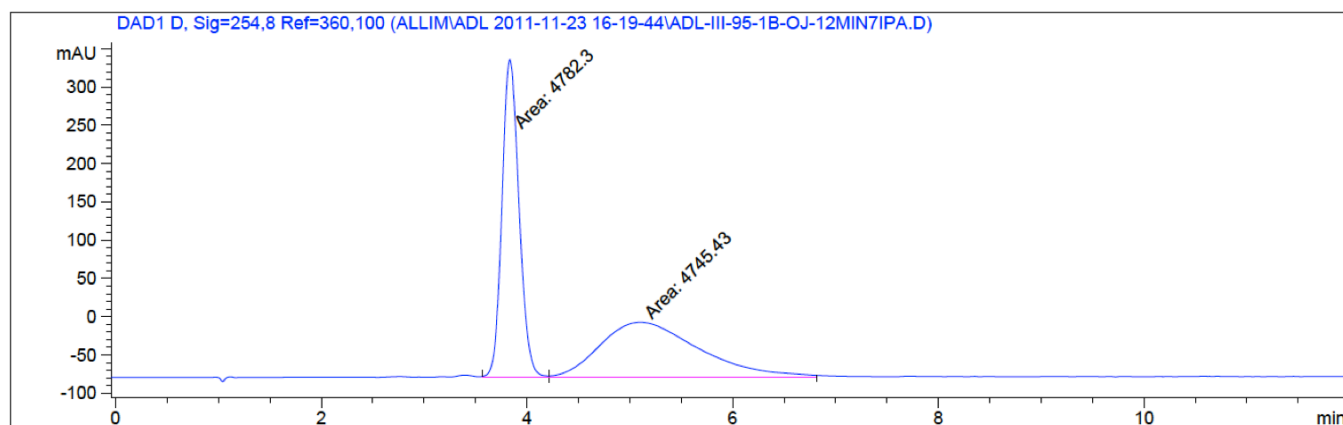

| Peak # | RetTime [min] | Type | Width [min] | Area [mAU*s] | Height [mAU] | Area %  |
|--------|---------------|------|-------------|--------------|--------------|---------|
| 1      | 3.834         | MM   | 0.1917      | 4782.29639   | 415.74722    | 50.1935 |
| 2      | 5.104         | MM   | 1.1066      | 4745.43164   | 71.46948     | 49.8065 |

**18i (Table 2, entry 9):** enantioenriched, 96% ee

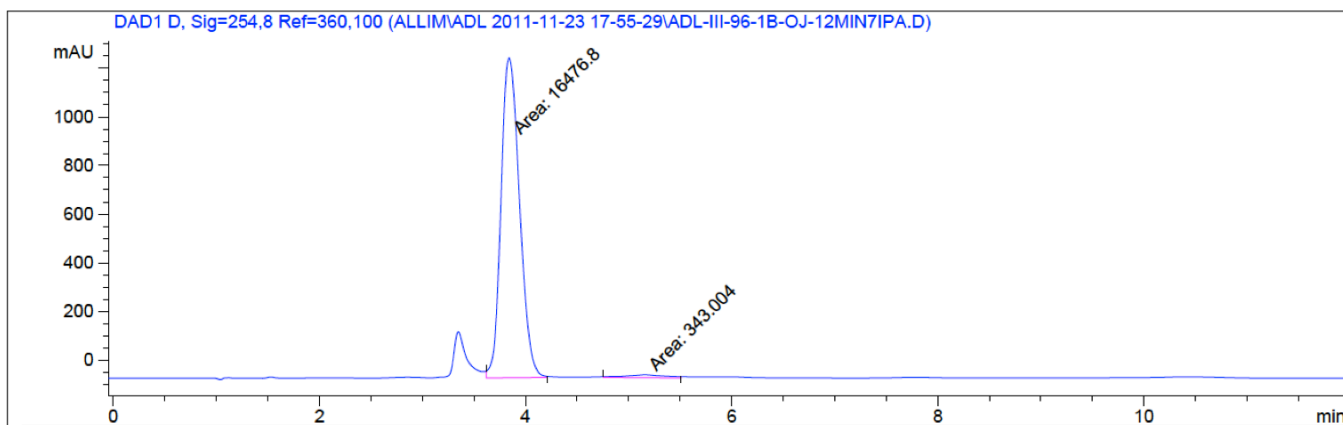

| Peak # | RetTime [min] | Type | Width [min] | Area [mAU*s] | Height [mAU] | Area %  |
|--------|---------------|------|-------------|--------------|--------------|---------|
| 1      | 3.840         | MM   | 0.2084      | 1.64768e4    | 1317.58875   | 97.9607 |
| 2      | 5.158         | MM   | 0.4531      | 343.00388    | 12.61787     | 2.0393  |

**18j (Table 2, entry 10):** racemic



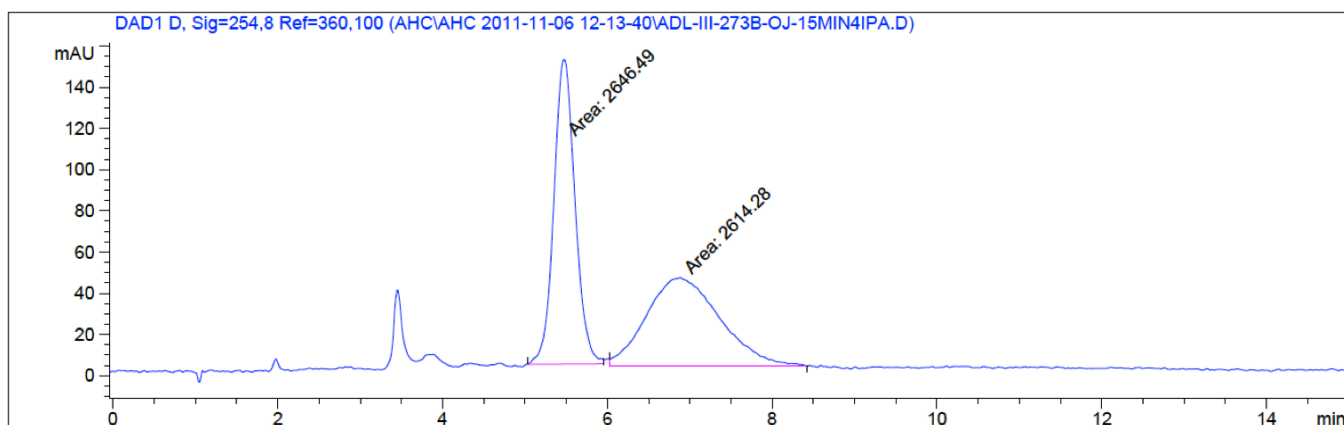

**18j (Table 2, entry 10):** enantioenriched, 96% ee

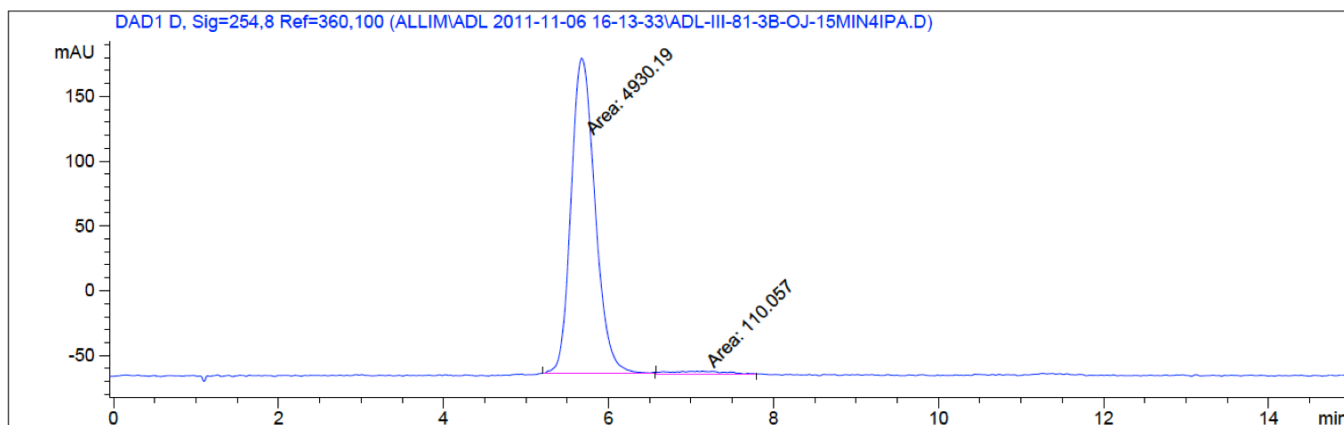

**18k (Table 2, entry 11):** racemic

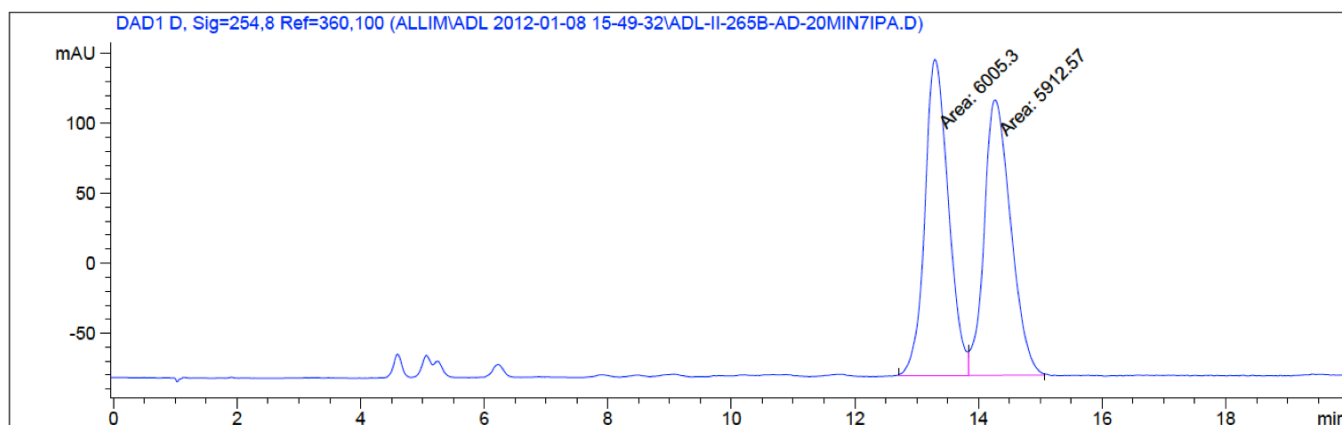

| Peak # | RetTime [min] | Type | Width [min] | Area [mAU*s] | Height [mAU] | Area %  |
|--------|---------------|------|-------------|--------------|--------------|---------|
| 1      | 13.296        | MM   | 0.4428      | 6005.30225   | 226.05704    | 50.3891 |
| 2      | 14.269        | MM   | 0.5006      | 5912.56543   | 196.85155    | 49.6109 |

**18k (Table 2, entry 11):** enantioenriched, 90% ee

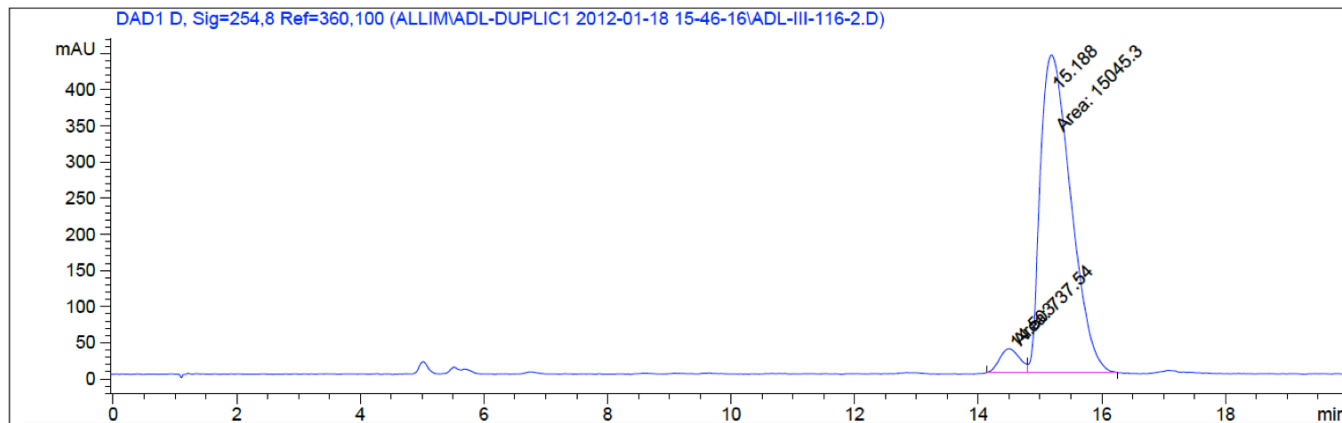

| Peak # | RetTime [min] | Type | Width [min] | Area [mAU*s] | Height [mAU] | Area %  |
|--------|---------------|------|-------------|--------------|--------------|---------|
| 1      | 14.503        | MM   | 0.3753      | 737.53986    | 32.75238     | 4.6730  |
| 2      | 15.188        | MM   | 0.5713      | 1.50453e4    | 438.93250    | 95.3270 |

**18l (Table 2, entry 12):** racemic

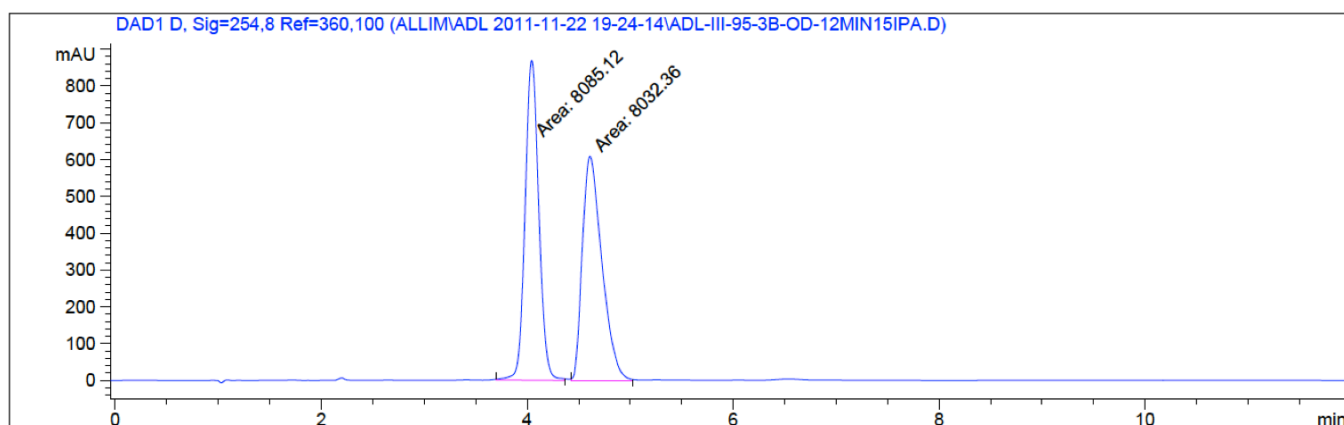

| Peak # | RetTime [min] | Type | Width [min] | Area [mAU*s] | Height [mAU] | Area %  |
|--------|---------------|------|-------------|--------------|--------------|---------|
| 1      | 4.043         | MM   | 0.1548      | 8085.12256   | 870.35547    | 50.1637 |
| 2      | 4.610         | MM   | 0.2194      | 8032.36475   | 610.30841    | 49.8363 |

**18l (Table 2, entry 12):** enantioenriched, 90% ee

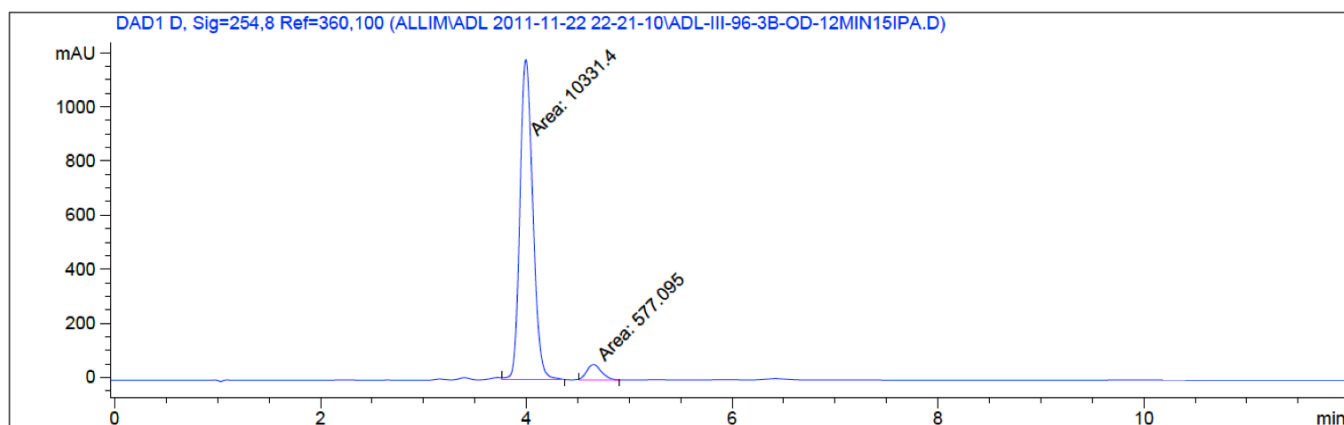

| Peak # | RetTime [min] | Type | Width [min] | Area [mAU*s] | Height [mAU] | Area %  |
|--------|---------------|------|-------------|--------------|--------------|---------|
| 1      | 3.996         | MM   | 0.1450      | 1.03314e4    | 1187.44409   | 94.7097 |
| 2      | 4.652         | MM   | 0.1678      | 577.09467    | 57.32602     | 5.2903  |

**18m (Table 2, entry 13):** racemic

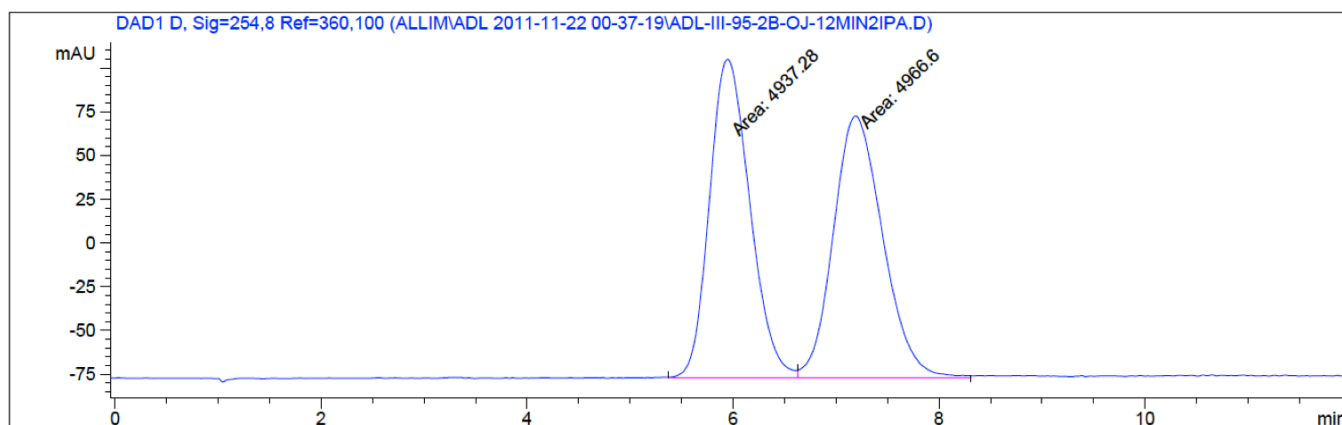

**18m (Table 2, entry 13):** enantioenriched, 94% ee

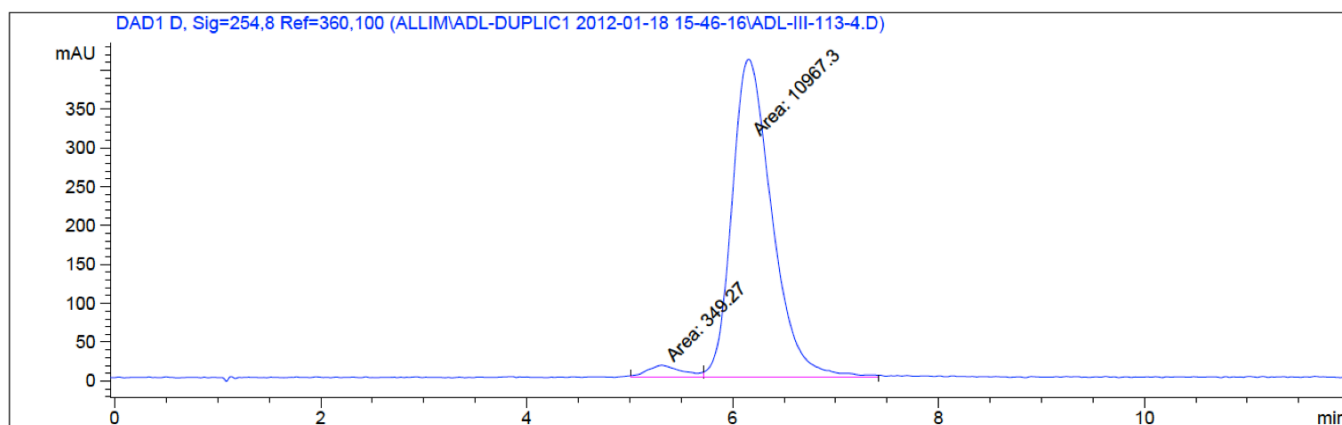

**18n (Table 2, entry 14):** racemic

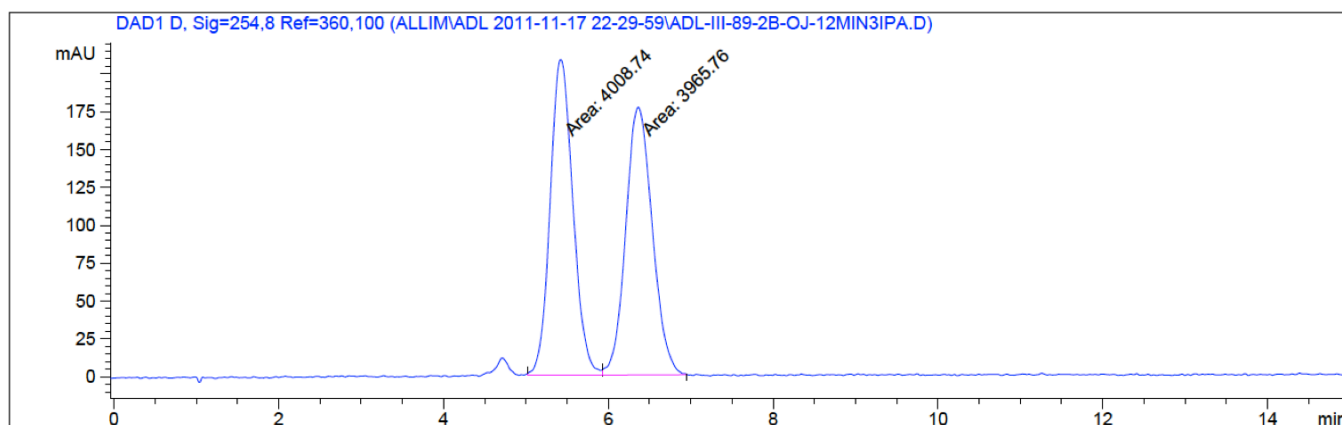

| Peak # | RetTime [min] | Type | Width [min] | Area [mAU*s] | Height [mAU] | Area %  |
|--------|---------------|------|-------------|--------------|--------------|---------|
| 1      | 5.422         | MM   | 0.3205      | 4008.73901   | 208.46022    | 50.2695 |
| 2      | 6.362         | MM   | 0.3737      | 3965.76196   | 176.85144    | 49.7305 |

**18n (Table 2, entry 14):** enantioenriched, 93% ee

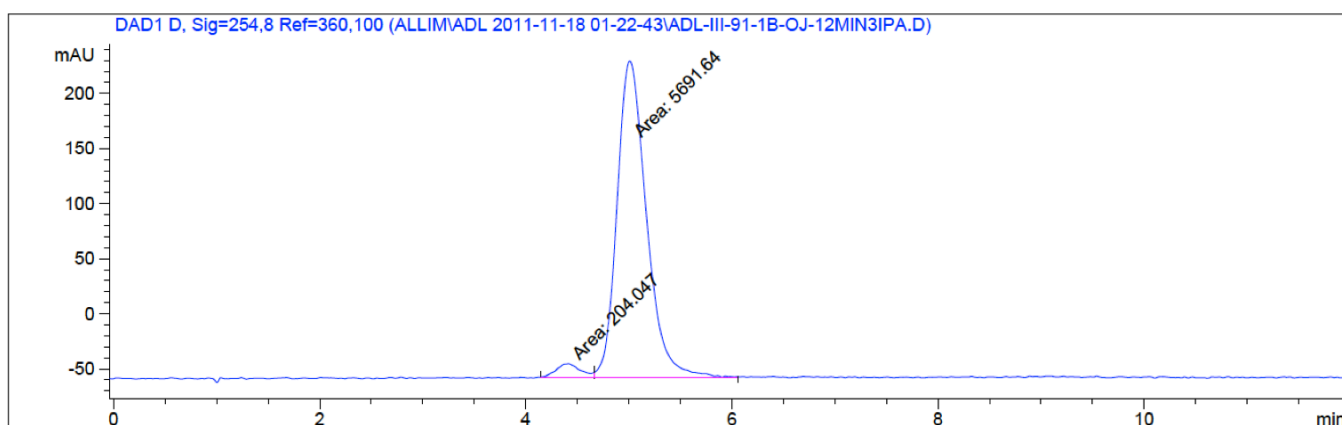

| Peak # | RetTime [min] | Type | Width [min] | Area [mAU*s] | Height [mAU] | Area %  |
|--------|---------------|------|-------------|--------------|--------------|---------|
| 1      | 4.412         | MM   | 0.2714      | 204.04715    | 12.53074     | 3.4610  |
| 2      | 5.009         | MM   | 0.3301      | 5691.64258   | 287.34784    | 96.5390 |

**18o (Table 2, entry 15):** racemic

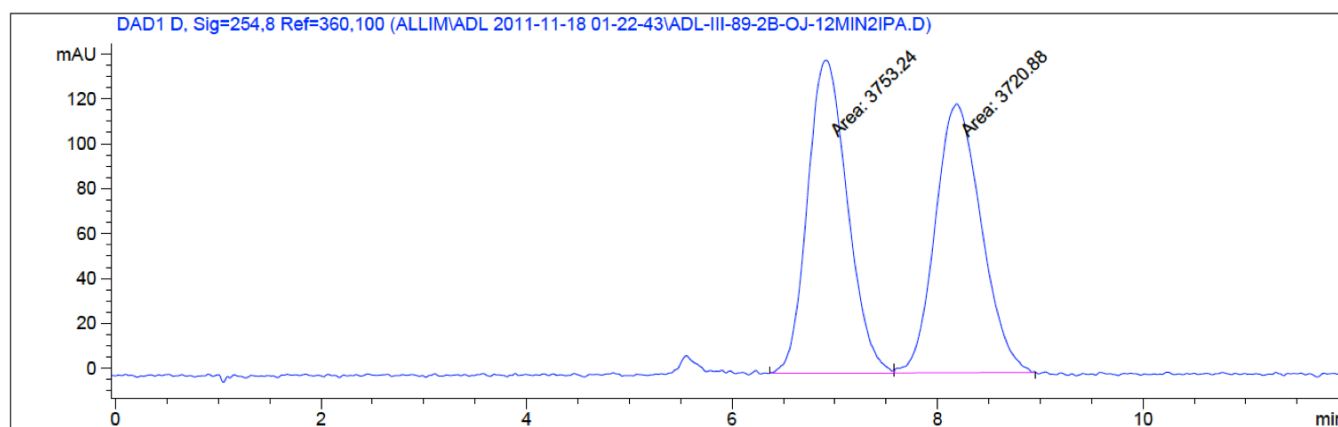

| Peak # | RetTime [min] | Type | Width [min] | Area [mAU*s] | Height [mAU] | Area %  |
|--------|---------------|------|-------------|--------------|--------------|---------|
| 1      | 6.916         | MM   | 0.4495      | 3753.23584   | 139.15379    | 50.2164 |
| 2      | 8.186         | MM   | 0.5183      | 3720.88330   | 119.64903    | 49.7836 |

**18o (Table 2, entry 15):** enantioenriched, 92% ee

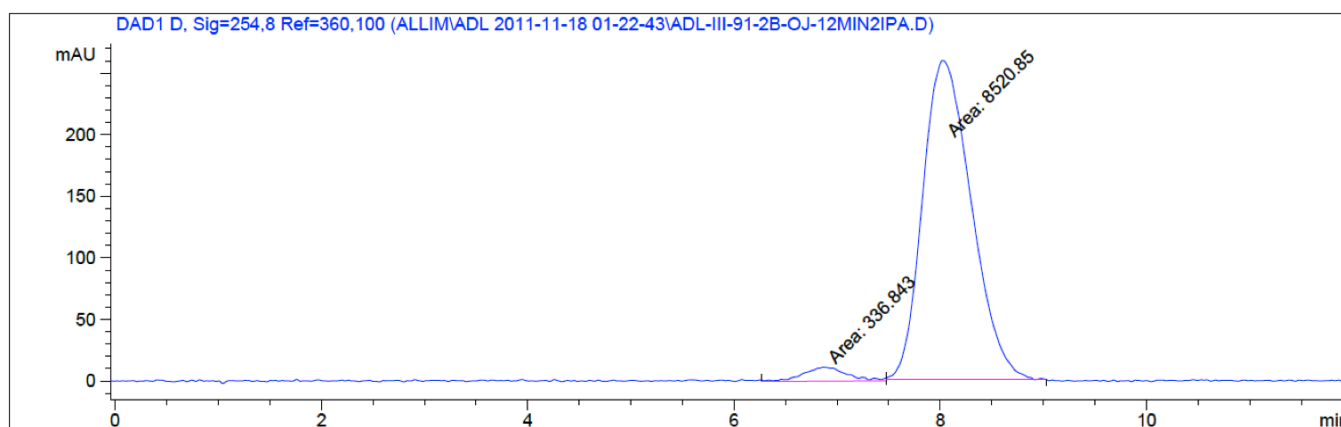

| Peak # | RetTime [min] | Type | Width [min] | Area [mAU*s] | Height [mAU] | Area %  |
|--------|---------------|------|-------------|--------------|--------------|---------|
| 1      | 6.875         | MM   | 0.4951      | 336.84314    | 11.33872     | 3.8028  |
| 2      | 8.028         | MM   | 0.5478      | 8520.84766   | 259.25595    | 96.1972 |

**18p (Table 2, entry 16):** racemic

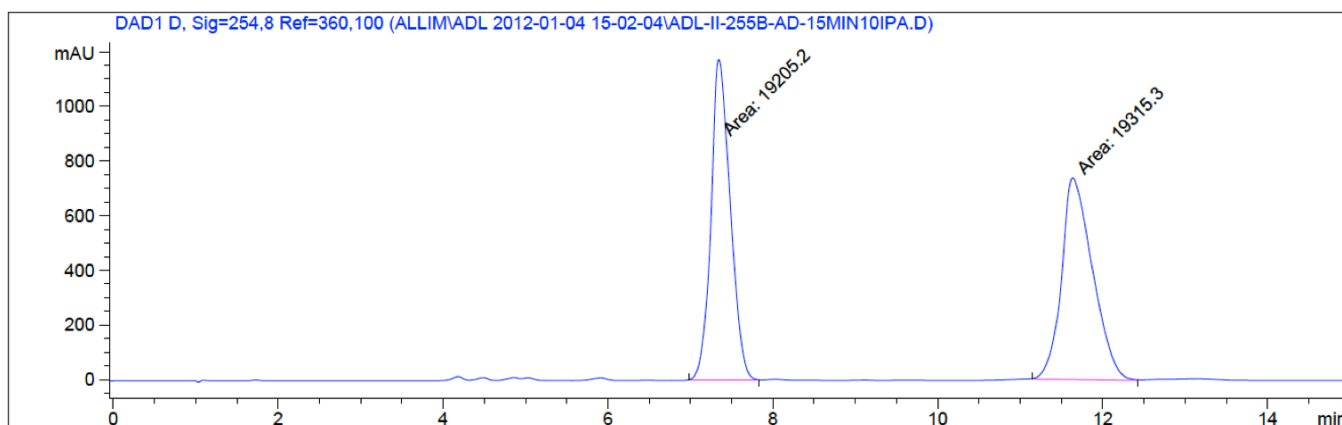

| Peak # | RetTime [min] | Type | Width [min] | Area [mAU*s] | Height [mAU] | Area %  |
|--------|---------------|------|-------------|--------------|--------------|---------|
| 1      | 7.344         | MM   | 0.2724      | 1.92052e4    | 1174.87732   | 49.8570 |
| 2      | 11.638        | MM   | 0.4363      | 1.93153e4    | 737.87109    | 50.1430 |

**18p (Table 2, entry 16):** enantioenriched, 92% ee

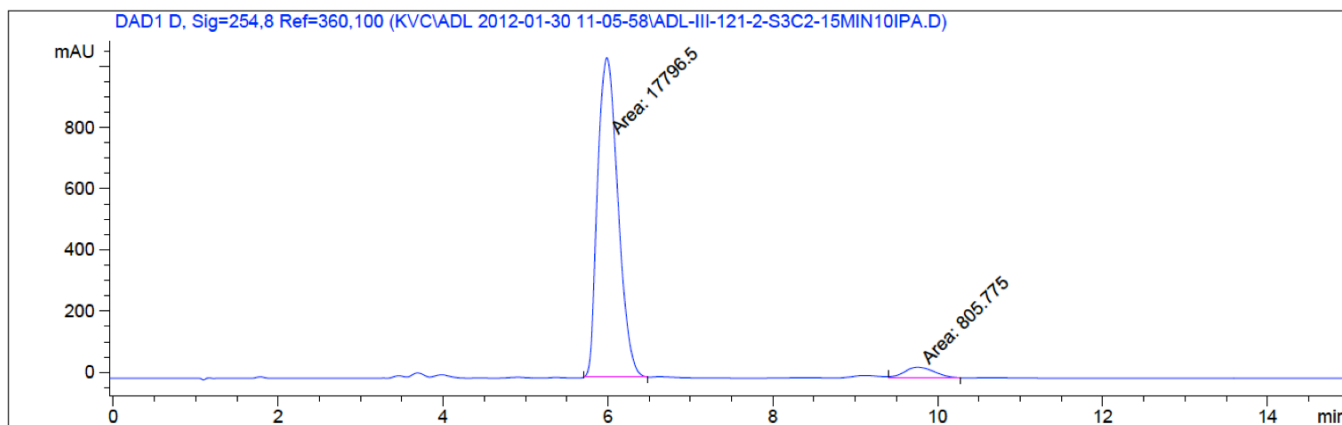

| Peak # | RetTime [min] | Type | Width [min] | Area [mAU*s] | Height [mAU] | Area %  |
|--------|---------------|------|-------------|--------------|--------------|---------|
| 1      | 5.986         | MM   | 0.2845      | 1.77965e4    | 1042.43127   | 95.6684 |
| 2      | 9.756         | MM   | 0.4056      | 805.77496    | 33.10773     | 4.3316  |

**18q (Table 2, entry 17):** racemic

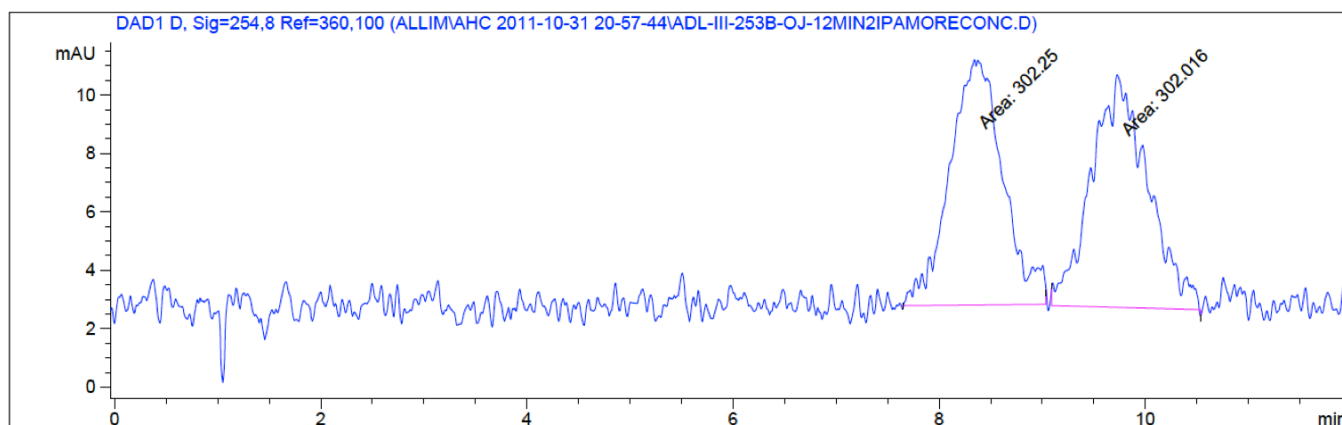

| Peak # | RetTime [min] | Type | Width [min] | Area [mAU*s] | Height [mAU] | Area %  |
|--------|---------------|------|-------------|--------------|--------------|---------|
| 1      | 8.342         | MM   | 0.5983      | 302.25012    | 8.41932      | 50.0193 |
| 2      | 9.729         | MM   | 0.6295      | 302.01633    | 7.99656      | 49.9807 |

**18q (Table 2, entry 17):** enantioenriched, 93% ee

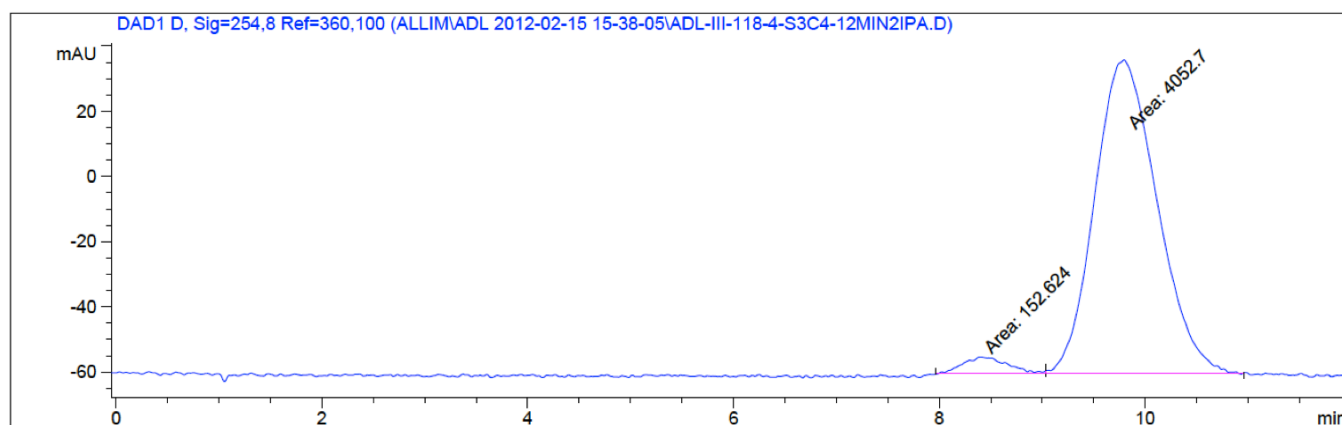

| Peak # | RetTime [min] | Type | Width [min] | Area [mAU*s] | Height [mAU] | Area %  |
|--------|---------------|------|-------------|--------------|--------------|---------|
| 1      | 8.397         | MM   | 0.5067      | 152.62421    | 5.01974      | 3.6293  |
| 2      | 9.795         | MM   | 0.7024      | 4052.70093   | 96.15991     | 96.3707 |

**18r (Table 2, entry 18):** racemic



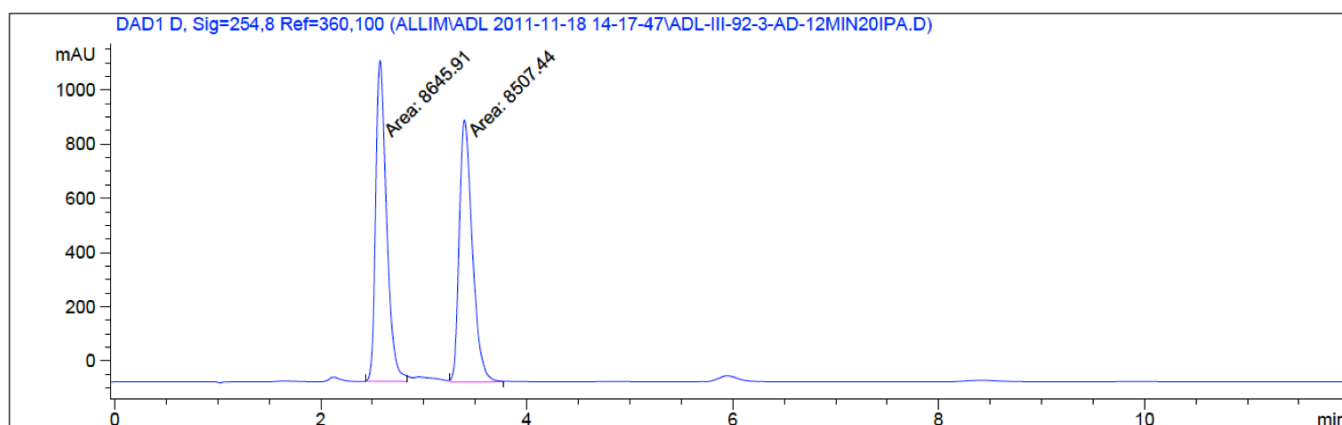

| Peak # | RetTime [min] | Type | Width [min] | Area [mAU*s] | Height [mAU] | Area %  |
|--------|---------------|------|-------------|--------------|--------------|---------|
| 1      | 2.576         | MM   | 0.1212      | 8645.91406   | 1189.34485   | 50.4036 |
| 2      | 3.396         | MM   | 0.1461      | 8507.43750   | 970.72430    | 49.5964 |

**18r (Table 2, entry 18):** enantioenriched, 90% ee

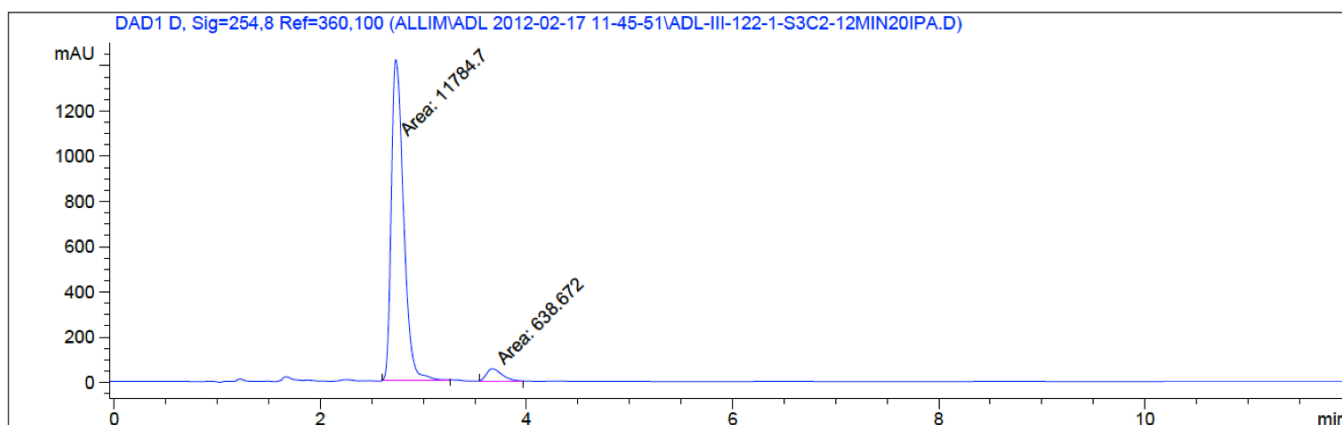

| Peak # | RetTime [min] | Type | Width [min] | Area [mAU*s] | Height [mAU] | Area %  |
|--------|---------------|------|-------------|--------------|--------------|---------|
| 1      | 2.735         | MM   | 0.1378      | 1.17847e4    | 1425.19104   | 94.8591 |
| 2      | 3.671         | MM   | 0.1867      | 638.67236    | 57.00725     | 5.1409  |

**18s (Table 2, entry 19):** racemic

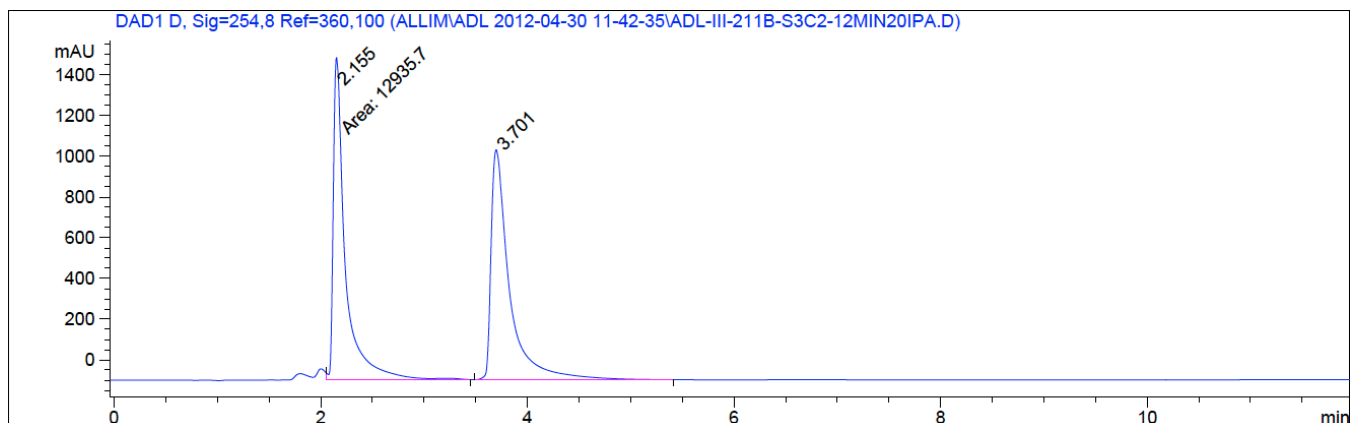

| Peak # | RetTime [min] | Type | Width [min] | Area [mAU*s] | Height [mAU] | Area %  |
|--------|---------------|------|-------------|--------------|--------------|---------|
| 1      | 2.155         | MM   | 0.1354      | 1.29357e4    | 1592.16809   | 48.0838 |
| 2      | 3.701         | VB   | 0.1806      | 1.39667e4    | 1126.56702   | 51.9162 |

**18s (Table 2, entry 19):** enantioenriched, 44% ee

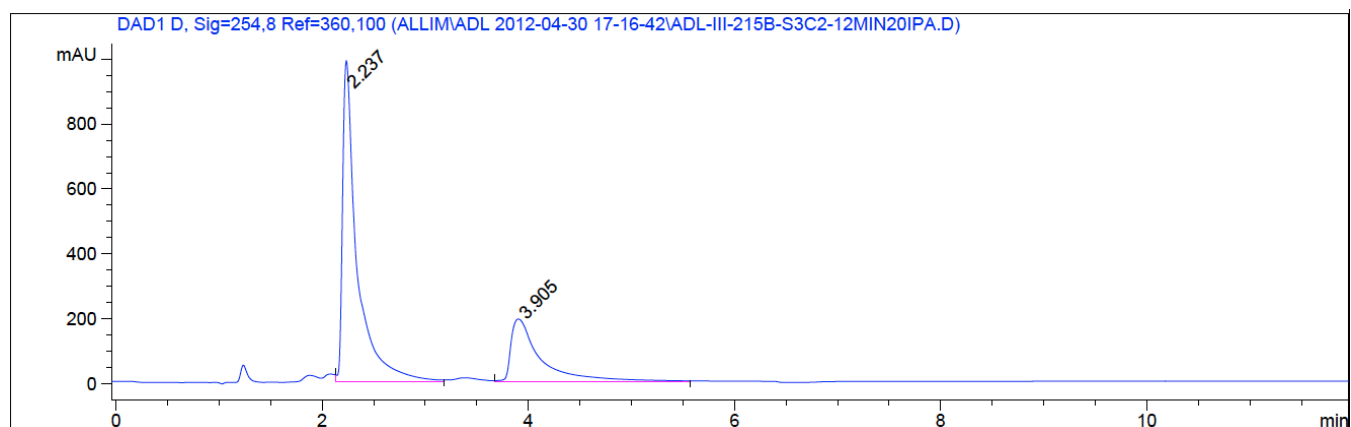

| Peak # | RetTime [min] | Type | Width [min] | Area [mAU*s] | Height [mAU] | Area %  |
|--------|---------------|------|-------------|--------------|--------------|---------|
| 1      | 2.237         | VB   | 0.1419      | 9604.80957   | 983.68304    | 71.8777 |
| 2      | 3.905         | VB   | 0.2807      | 3757.89526   | 191.67908    | 28.1223 |

**19a (Table 3):** racemic

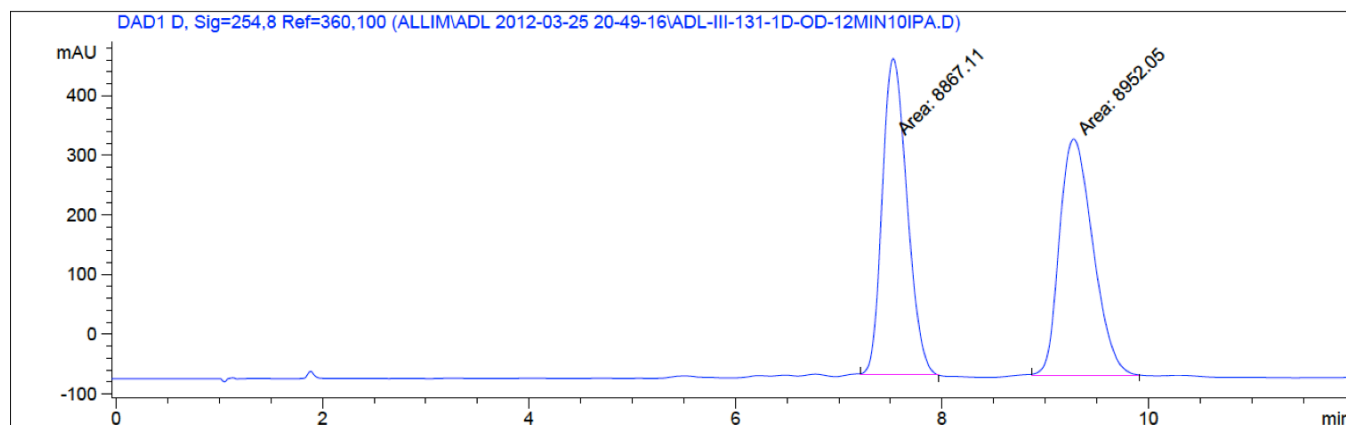

| Peak # | RetTime [min] | Type | Width [min] | Area [mAU*s] | Height [mAU] | Area %  |
|--------|---------------|------|-------------|--------------|--------------|---------|
| 1      | 7.528         | MM   | 0.2786      | 8867.11035   | 530.54260    | 49.7617 |
| 2      | 9.276         | MM   | 0.3763      | 8952.04590   | 396.47534    | 50.2383 |

**19a (Table 3):** enantioenriched, 90% ee

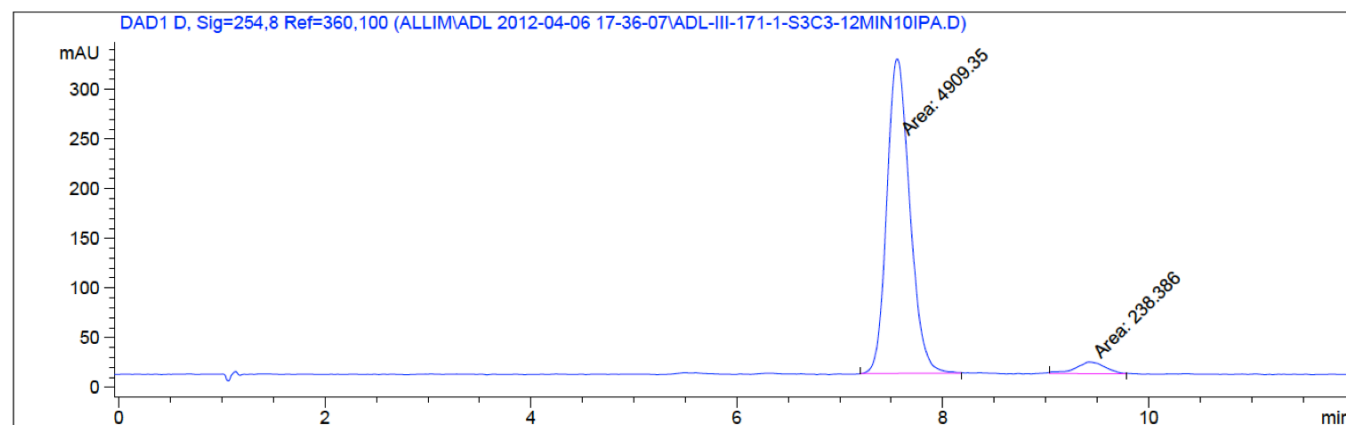

| Peak # | RetTime [min] | Type | Width [min] | Area [mAU*s] | Height [mAU] | Area %  |
|--------|---------------|------|-------------|--------------|--------------|---------|
| 1      | 7.558         | MM   | 0.2580      | 4909.35205   | 317.09402    | 95.3691 |
| 2      | 9.425         | MM   | 0.3346      | 238.38634    | 11.87408     | 4.6309  |

**19b (Table 3):** racemic

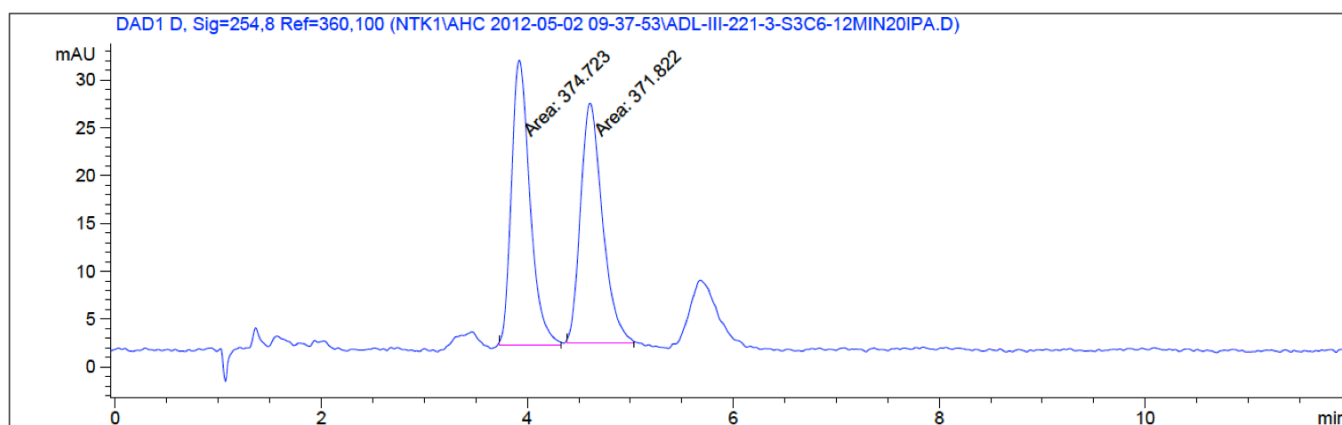

| Peak # | RetTime [min] | Type | Width [min] | Area [mAU*s] | Height [mAU] | Area %  |
|--------|---------------|------|-------------|--------------|--------------|---------|
| 1      | 3.923         | MM   | 0.2092      | 374.72302    | 29.85601     | 50.1943 |
| 2      | 4.609         | MM   | 0.2470      | 371.82239    | 25.08781     | 49.8057 |

**19b (Table 3):** enantioenriched, 90% ee

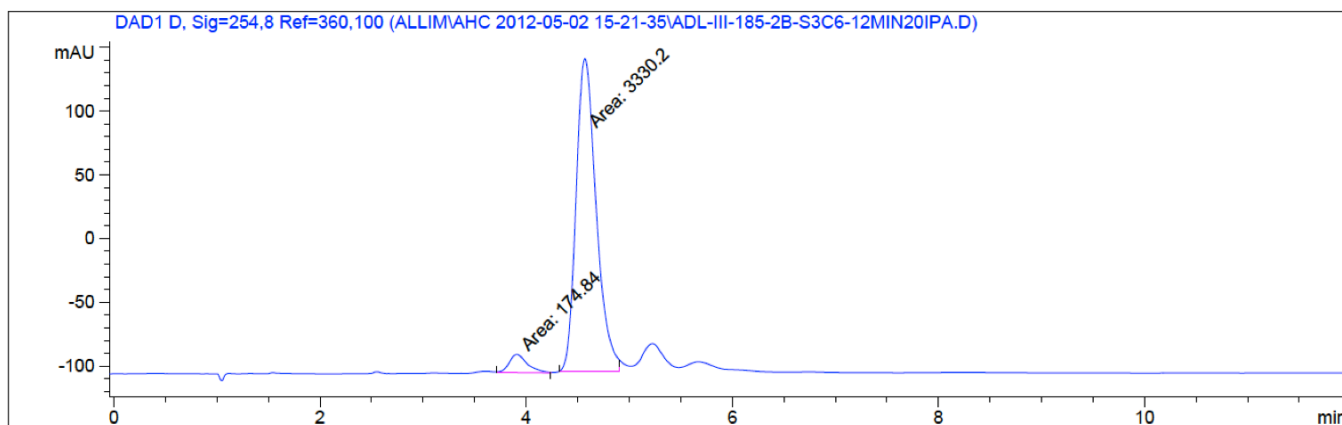

| Peak # | RetTime [min] | Type | Width [min] | Area [mAU*s] | Height [mAU] | Area %  |
|--------|---------------|------|-------------|--------------|--------------|---------|
| 1      | 3.909         | MM   | 0.2045      | 174.84013    | 14.24727     | 4.9882  |
| 2      | 4.570         | MM   | 0.2260      | 3330.20483   | 245.55070    | 95.0118 |

**19c (Table 3):** racemic

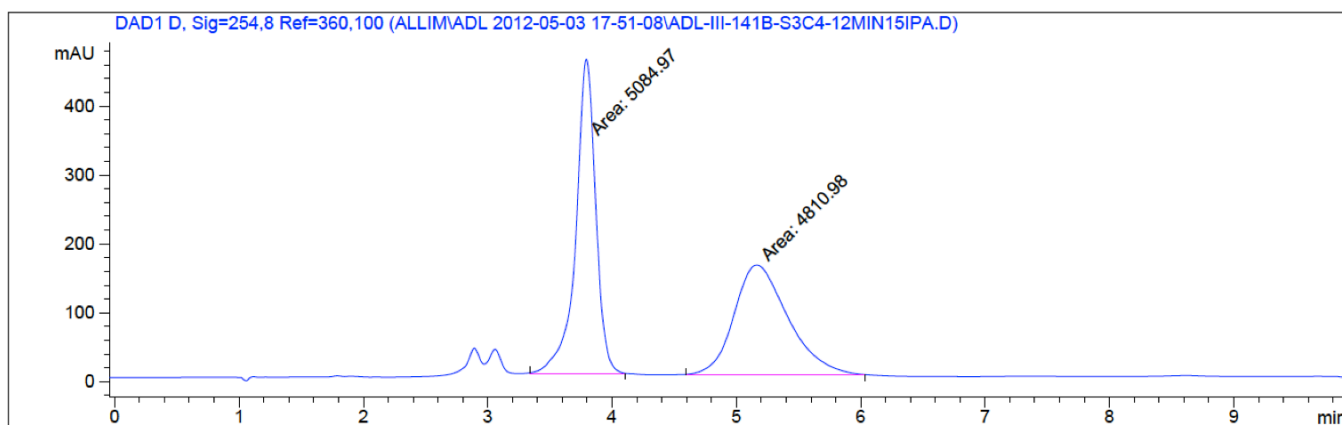

| Peak # | RetTime [min] | Type | Width [min] | Area [mAU*s] | Height [mAU] | Area %  |
|--------|---------------|------|-------------|--------------|--------------|---------|
| 1      | 3.794         | MM   | 0.1854      | 5084.96924   | 457.11218    | 51.3844 |
| 2      | 5.165         | MM   | 0.5036      | 4810.97998   | 159.20520    | 48.6156 |

**19c (Table 3):** enantioenriched, 90% ee

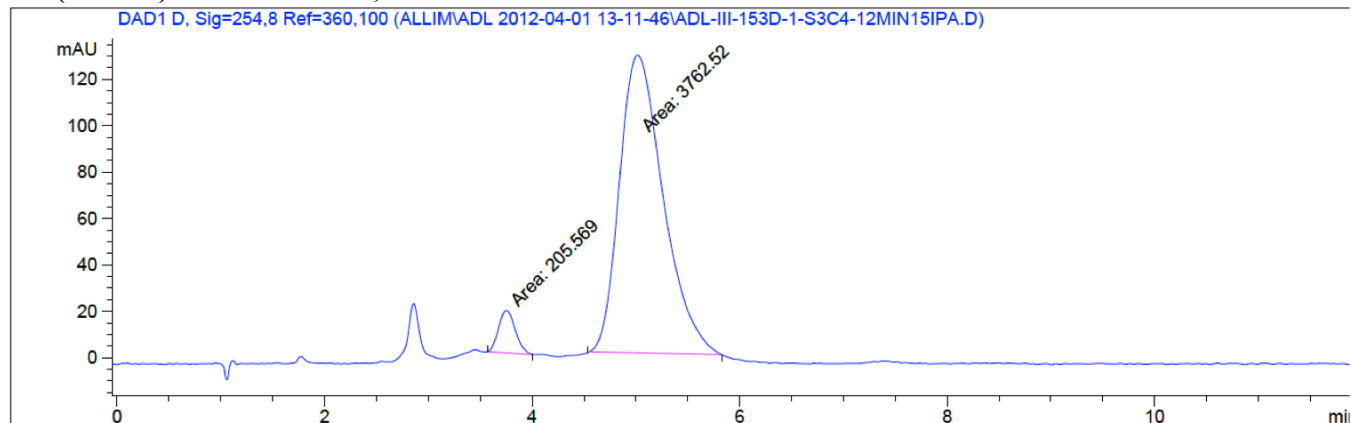

| Peak # | RetTime [min] | Type | Width [min] | Area [mAU*s] | Height [mAU] | Area %  |
|--------|---------------|------|-------------|--------------|--------------|---------|
| 1      | 3.752         | MM   | 0.1869      | 205.56940    | 18.33098     | 5.1806  |
| 2      | 5.016         | MM   | 0.4891      | 3762.51758   | 128.21497    | 94.8194 |

**19d (Table 3):** racemic

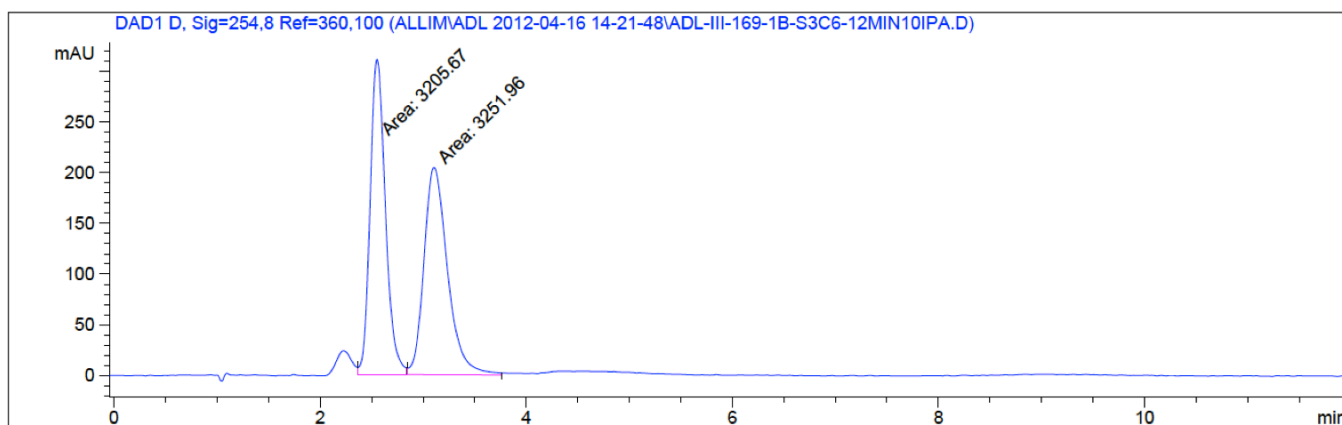

| Peak # | RetTime [min] | Type | Width [min] | Area [mAU*s] | Height [mAU] | Area %  |
|--------|---------------|------|-------------|--------------|--------------|---------|
| 1      | 2.552         | MM   | 0.1717      | 3205.67017   | 311.25909    | 49.6416 |
| 2      | 3.106         | MM   | 0.2652      | 3251.96484   | 204.37744    | 50.3584 |

**19d (Table 3):** enantioenriched, 90% ee

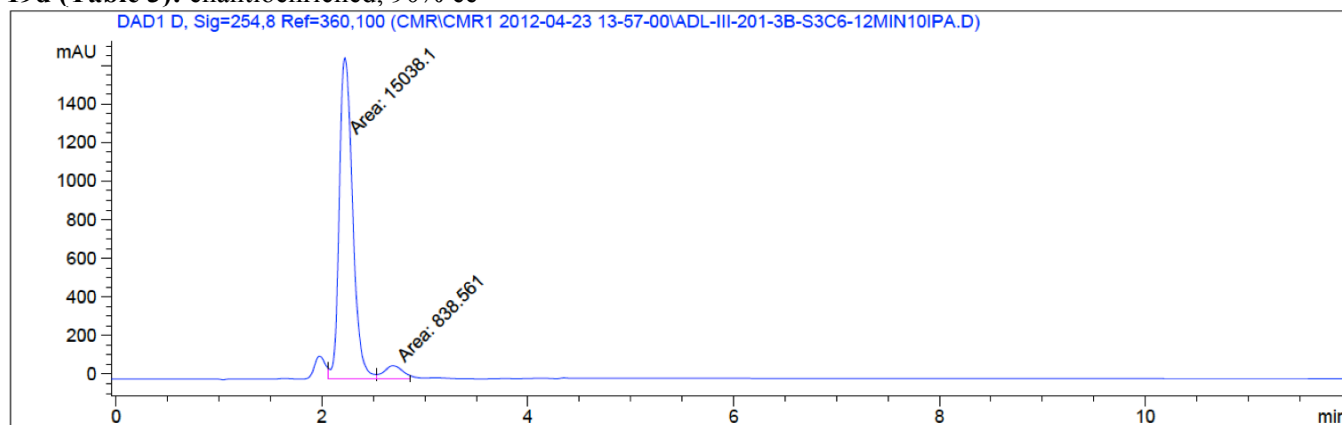

| Peak # | RetTime [min] | Type | Width [min] | Area [mAU*s] | Height [mAU] | Area %  |
|--------|---------------|------|-------------|--------------|--------------|---------|
| 1      | 2.224         | MM   | 0.1504      | 1.50381e4    | 1666.51477   | 94.7183 |
| 2      | 2.693         | MM   | 0.2084      | 838.56067    | 67.05596     | 5.2817  |

**19e (Table 3):** racemic

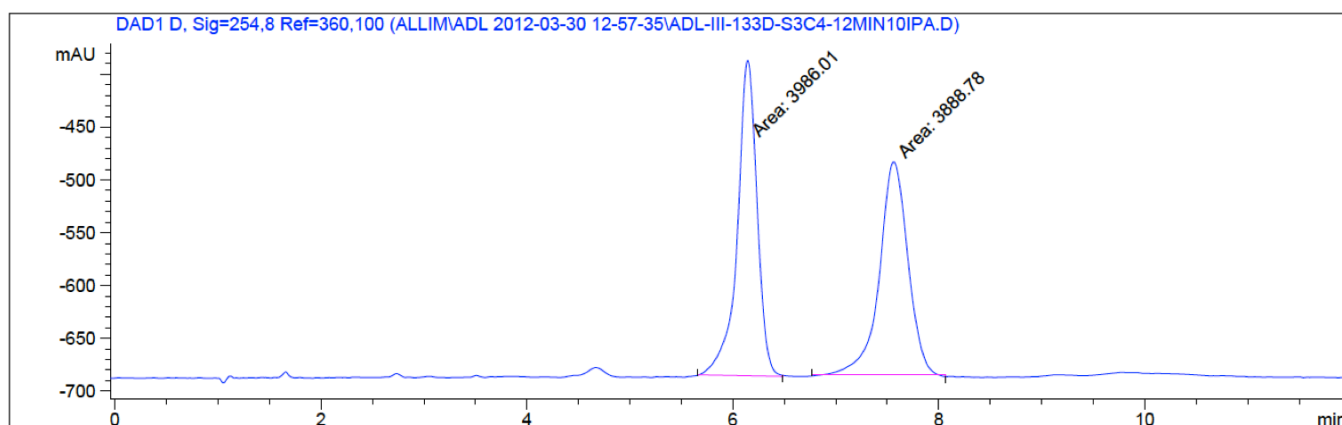

| Peak # | RetTime [min] | Type | Width [min] | Area [mAU*s] | Height [mAU] | Area %  |
|--------|---------------|------|-------------|--------------|--------------|---------|
| 1      | 6.144         | MM   | 0.2222      | 3986.00659   | 298.95831    | 50.6173 |
| 2      | 7.563         | MM   | 0.3216      | 3888.78369   | 201.55779    | 49.3827 |

**19e (Table 3):** enantioenriched, 90% ee

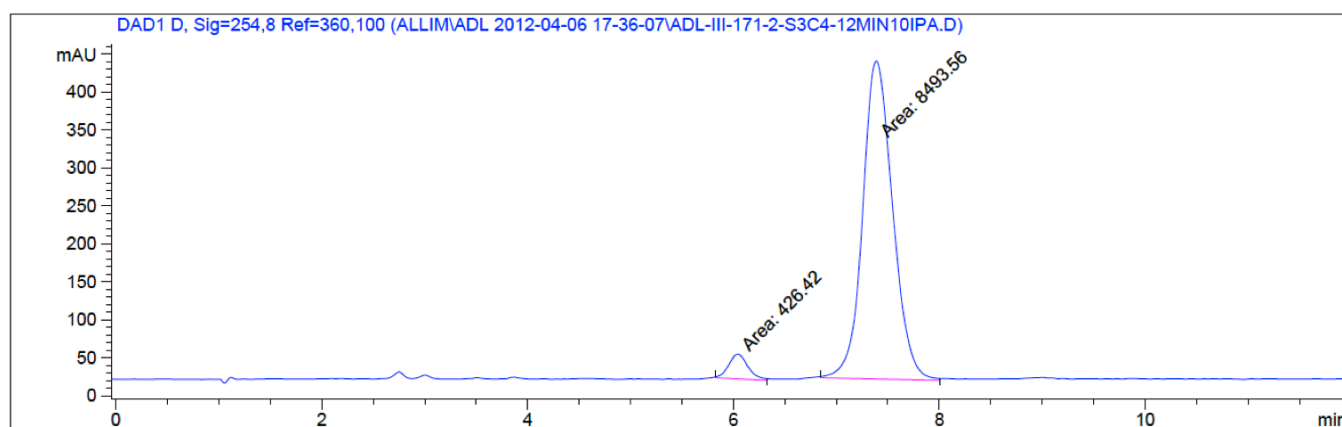

| Peak # | RetTime [min] | Type | Width [min] | Area [mAU*s] | Height [mAU] | Area %  |
|--------|---------------|------|-------------|--------------|--------------|---------|
| 1      | 6.042         | MM   | 0.2176      | 426.42010    | 32.65453     | 4.7805  |
| 2      | 7.388         | MM   | 0.3377      | 8493.55664   | 419.18365    | 95.2195 |

**19f (Table 3):** racemic

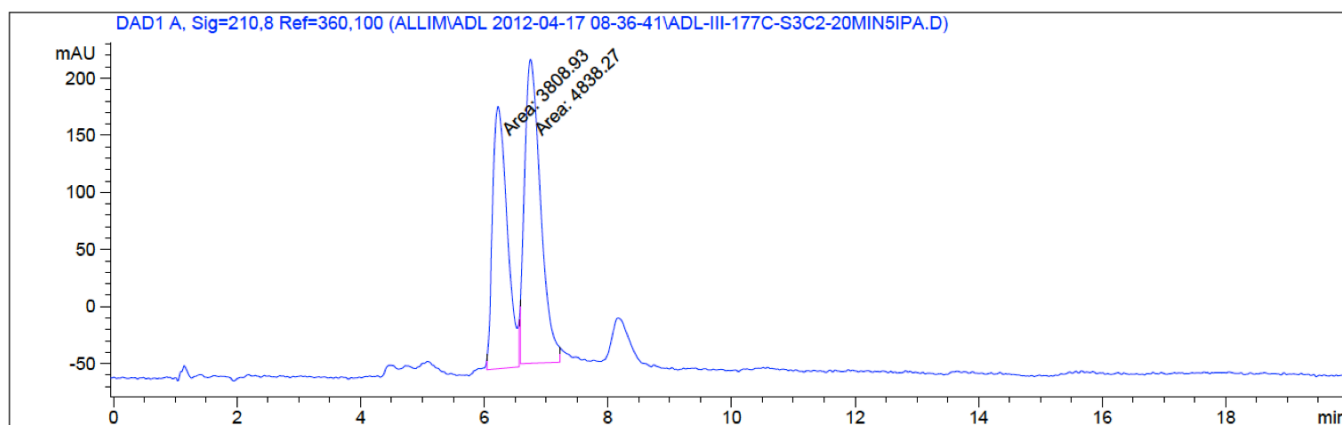

| Peak # | RetTime [min] | Type | Width [min] | Area [mAU*s] | Height [mAU] | Area %  |
|--------|---------------|------|-------------|--------------|--------------|---------|
| 1      | 6.222         | MM   | 0.2762      | 3808.92651   | 229.80165    | 44.0481 |
| 2      | 6.749         | MM   | 0.3024      | 4838.27002   | 266.61557    | 55.9519 |

**19f (Table 3):** enantioenriched, 90% ee

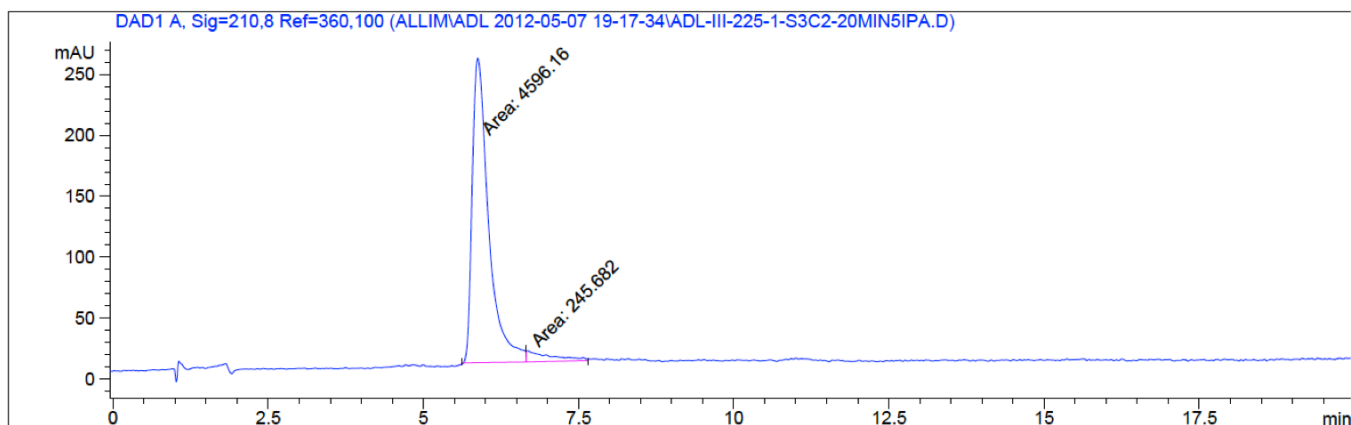

| Peak # | RetTime [min] | Type | Width [min] | Area [mAU*s] | Height [mAU] | Area %  |
|--------|---------------|------|-------------|--------------|--------------|---------|
| 1      | 5.878         | MM   | 0.3065      | 4596.16162   | 249.90791    | 94.9258 |
| 2      | 6.674         | MM   | 0.4528      | 245.68248    | 9.04279      | 5.0742  |

## References



---

<sup>1</sup> Still, W. C., Kahn, M. & Mitra, A. Rapid chromatographic technique for preparative separations with moderate resolution. *J. Org. Chem.* **43**, 2923-2925 (1978).

<sup>2</sup> Codelli, J. A., Puchlopek, A. L. A. & Reisman, S. E. Enantioselective Total Synthesis of (–)-Acetylaranotin, a Dihydrooxepine Epidithiodiketopiperazine. *J. Am. Chem. Soc.* **134**, 1930-1933 (2012).
